# Supplementary material for: Quantitative analysis of fucosylated glycoproteins by immobilized lectin-affinity fluorescent labeling
Source: Royal Society of Chemistry journal article supplement (doi:10.1039/d3ra00072a), 2023-01-01
Supplement: d3ra00072a2.xlsx [file d3ra00072a2.xlsx]

## Sheet: Description
Table S1: Proteomic characteristics of 103 LUAD samples. Related to Figure 1, 3, 4 and 5.
Sheet	Description
Table S1A	A list of proteins identified from human whole saliva.
Table S1B	A list of proteins identified from human lung tissue.

## Sheet: Saliva
Gene	Accession ID	Entrezgene	Protein Name	Glycosylated (Y/N?)
AASDHPPT	NP_056238	60496	aminoadipate-semialdehyde dehydrogenase-phosphopantetheinyl transferase	Y*
ABCE1	NP_001035809	6059	ATP binding cassette subfamily E member 1	Y*
ABR	NP_068781	29	ABR activator of RhoGEF and GTPase	Y*
ACAA1	NP_001598	30	acetyl-CoA acyltransferase 1	Y*
ACAA2	NP_006102	10449	acetyl-CoA acyltransferase 2	Y*
ACADVL	NP_000009	37	acyl-CoA dehydrogenase very long chain	Y*
ACAP2	NP_036419	23527	ArfGAP with coiled-coil, ankyrin repeat and PH domains 2	Y*
ACAT1	NP_000010	38	acetyl-CoA acetyltransferase 1	Y*
ACAT2	NP_005882	39	acetyl-CoA acetyltransferase 2	Y*
ACBD3	NP_073572	64746	acyl-CoA binding domain containing 3	Y*
ACLY	NP_942127	47	ATP citrate lyase	Y*
ACO1	NP_002188	48	aconitase 1	Y*
ACO2	NP_001089	50	aconitase 2	Y*
ACOT7	NP_863656	11332	acyl-CoA thioesterase 7	Y*
ACP1	NP_001035739	52	acid phosphatase 1	Y*
ACSS2	NP_001070020	55902	acyl-CoA synthetase short chain family member 2	Y*
ACTC1	NP_005150	70	actin alpha cardiac muscle 1	Y*
ACTL6A	NP_829888	86	actin like 6A	Y*
ACTN1	NP_001093	87	actinin alpha 1	Y*
ACTN2	NP_001094	88	actinin alpha 2	Y*
ACTN3	NP_001095	89	actinin alpha 3	Y*
ACTN4	NP_004915	81	actinin alpha 4	Y*
ACTR2	NP_001005386	10097	actin related protein 2	Y*
ANKRD13A	NP_149112	88455	ankyrin repeat domain 13A	Y*
ANXA3	NP_005130	306	annexin A3	Y*
APAF1	NP_863658	317	apoptotic peptidase activating factor 1	Y*
API5	NP_006586	8539	apoptosis inhibitor 5	Y*
APOBR	NP_061160	55911	apolipoprotein B receptor	Y*
GABARAPL1	NP_113600	23710	GABA type A receptor associated protein like 1	Y*
IL36A	NP_055255	27179	interleukin 36 alpha	Y*
INSYN2A	NP_001034851	642938	inhibitory synaptic factor 2A	Y*
IQCG	NP_115639	84223	IQ motif containing G	Y*
KATNAL1	NP_001014402	84056	katanin catalytic subunit A1 like 1	Y*
KHDRBS1	NP_006550	10657	KH RNA binding domain containing, signal transduction associated 1	Y*
KHDRBS2	NP_689901	202559	KH RNA binding domain containing, signal transduction associated 2	Y*
KIAA0513	NP_055547	9764	KIAA0513	Y*
KIAA0930	NP_001009880	23313	KIAA0930	Y*
LAD1	NP_005549	3898	ladinin 1	Y*
LGALS7	NP_002298	3963	galectin 7	Y*
LGALSL	NP_054900	29094	galectin like	Y*
LHPP	NP_071409	64077	phospholysine phosphohistidine inorganic pyrophosphate phosphatase	Y*
LRSAM1	NP_001005374	90678	leucine rich repeat and sterile alpha motif containing 1	Y*
LYN	NP_001104567	4067	LYN proto-oncogene, Src family tyrosine kinase	Y*
LYPLA2	NP_009191	11313	lysophospholipase 2	Y*
MAP2K3	NP_659731	5606	mitogen-activated protein kinase kinase 3	Y*
MAPK1	NP_002736	5594	mitogen-activated protein kinase 1	Y*
MAPK14	NP_620581	1432	mitogen-activated protein kinase 14	Y*
MAPKAP1	NP_001006618	79109	MAPK associated protein 1	Y*
STK10	NP_005981	6793	serine/threonine kinase 10	Y*
STK4	NP_006273	6789	serine/threonine kinase 4	Y*
SULT1A1	NP_803878	6817	sulfotransferase family 1A member 1	Y*
SUOX	NP_001027559	6821	sulfite oxidase	Y*
SWAP70	NP_055870	23075	switching B cell complex subunit SWAP70	Y*
TADA2A	NP_001479	6871	transcriptional adaptor 2A	Y*
TALDO1	NP_006746	6888	transaldolase 1	Y*
TAOK3	NP_057365	51347	TAO kinase 3	Y*
TARS1	NP_689508	6897	threonyl-tRNA synthetase 1	Y*
USP15	NP_006304	9958	ubiquitin specific peptidase 15	Y*
VARS1	NP_006286	7407	valyl-tRNA synthetase 1	Y*
ARFIP1	NP_001020766	27236	ADP ribosylation factor interacting protein 1	Y*
ARMCX3	NP_808817	51566	armadillo repeat containing X-linked 3	Y*
ASL	NP_001020114	435	argininosuccinate lyase	Y*
ATP6V1C1	NP_001686	528	ATPase H+ transporting V1 subunit C1	Y*
ATXN3	NP_001121169	4287	ataxin 3	Y*
BICD2	NP_001003800	23299	BICD cargo adaptor 2	Y*
BIN2	NP_057377	51411	bridging integrator 2	Y*
BRAF	NP_004324	673	B-Raf proto-oncogene, serine/threonine kinase	Y*
C1GALT1C1	NP_001011551	29071	C1GALT1 specific chaperone 1	Y*
C6orf58	NP_001010905	352999	chromosome 6 open reading frame 58	Y*
CA13	NP_940986	377677	carbonic anhydrase 13	Y*
CARD8	NP_055774	22900	caspase recruitment domain family member 8	Y*
CBR3	NP_001227	874	carbonyl reductase 3	Y*
CCT6A	NP_001009186	908	chaperonin containing TCP1 subunit 6A	Y*
CCT8	NP_006576	10694	chaperonin containing TCP1 subunit 8	Y*
CERT1	NP_112729	10087	ceramide transporter 1	Y*
CHMP2A	NP_940818	27243	charged multivesicular body protein 2A	Y*
CIAPIN1	NP_064709	57019	cytokine induced apoptosis inhibitor 1	Y*
CKMT2	NP_001093206	1160	creatine kinase, mitochondrial 2	Y*
CNBD1	NP_775809	168975	cyclic nucleotide binding domain containing 1	Y*
COPS3	NP_003644	8533	COP9 signalosome subunit 3	Y*
COPS4	NP_057213	51138	COP9 signalosome subunit 4	Y*
COPS7B	NP_073567	64708	COP9 signalosome subunit 7B	Y*
CORO6	NP_116243	84940	coronin 6	Y*
CPPED1	NP_001092925	55313	calcineurin like phosphoesterase domain containing 1	Y*
CRABP2	NP_001869	1382	cellular retinoic acid binding protein 2	Y*
CSE1L	NP_001307	1434	chromosome segregation 1 like	Y*
CTNNBIP1	NP_001012329	56998	catenin beta interacting protein 1	Y*
CYB5R4	NP_057314	51167	cytochrome b5 reductase 4	Y*
CYRIA	NP_110424	81553	CYFIP related Rac1 interactor A	Y*
DEF6	NP_071330	50619	DEF6 guanine nucleotide exchange factor	Y*
DNAJC5	NP_079495	80331	DnaJ heat shock protein family (Hsp40) member C5	Y*
DOK1	NP_001372	1796	docking protein 1	Y*
DYNLRB1	NP_054902	83658	dynein light chain roadblock-type 1	Y*
DYNLT1	NP_006510	6993	dynein light chain Tctex-type 1	Y*
EIF1AX	NP_001403	1964	eukaryotic translation initiation factor 1A X-linked	Y*
EIF3CL	NP_001093131	728689	eukaryotic translation initiation factor 3 subunit C like	Y*
EIF4E3	NP_775495	317649	eukaryotic translation initiation factor 4E family member 3	Y*
EIF5B	NP_056988	9669	eukaryotic translation initiation factor 5B	Y*
EPHX2	NP_001970	2053	epoxide hydrolase 2	Y*
EPS15L1	NP_067058	58513	epidermal growth factor receptor pathway substrate 15 like 1	Y*
FAM114A2	NP_061161	10827	family with sequence similarity 114 member A2	Y*
FAM53B	NP_055476	9679	family with sequence similarity 53 member B	Y*
FARSB	NP_005678	10056	phenylalanyl-tRNA synthetase subunit beta	Y*
FBXO10	NP_036298	26267	F-box protein 10	Y*
FERMT3	NP_848537	83706	FERM domain containing kindlin 3	Y*
FGD3	NP_149077	89846	FYVE, RhoGEF and PH domain containing 3	Y*
FGD4	NP_640334	121512	FYVE, RhoGEF and PH domain containing 4	Y*
FNBP1	NP_055848	23048	formin binding protein 1	Y*
GAS7	NP_958836	8522	growth arrest specific 7	Y*
GATD3	NP_937798	8209	glutamine amidotransferase class 1 domain containing 3	Y*
GBE1	NP_000149	2632	1,4-alpha-glucan branching enzyme 1	Y*
GBP2	NP_004111	2634	guanylate binding protein 2	Y*
GBP6	NP_940862	163351	guanylate binding protein family member 6	Y*
GMIP	NP_057657	51291	GEM interacting protein	Y*
GNA12	NP_031379	2768	G protein subunit alpha 12	Y*
GNAO1	NP_620073	2775	G protein subunit alpha o1	Y*
GORASP1	NP_114105	64689	golgi reassembly stacking protein 1	Y*
GPCPD1	NP_062539	56261	glycerophosphocholine phosphodiesterase 1	Y*
GRK6	NP_001004105	2870	G protein-coupled receptor kinase 6	Y*
GSDMD	NP_079012	79792	gasdermin D	Y*
GSR	NP_000628	2936	glutathione-disulfide reductase	Y*
GSS	NP_000169	2937	glutathione synthetase	Y*
HIBADH	NP_689953	11112	3-hydroxyisobutyrate dehydrogenase	Y*
HSD17B10	NP_001032900	3028	hydroxysteroid 17-beta dehydrogenase 10	Y*
HTATIP2	NP_001091992	10553	HIV-1 Tat interactive protein 2	Y*
HYPK	NP_057484	25764	huntingtin interacting protein K	Y*
IDH1	NP_005887	3417	isocitrate dehydrogenase (NADP(+)) 1	Y*
ME1	NP_002386	4199	malic enzyme 1	Y*
MOSPD2	NP_689794	158747	motile sperm domain containing 2	Y*
MPP1	NP_002427	4354	MAGUK p55 scaffold protein 1	Y*
MRI1	NP_001026897	84245	methylthioribose-1-phosphate isomerase 1	Y*
MROH5	NP_997297	389690	maestro heat like repeat family member 5 (gene/pseudogene)	Y*
MSRA	NP_036463	4482	methionine sulfoxide reductase A	Y*
MSRB1	NP_057416	51734	methionine sulfoxide reductase B1	Y*
MYL11	NP_037424	29895	myosin light chain 11	Y*
NADK	NP_075394	65220	NAD kinase	Y*
NAP1L4	NP_005960	4676	nucleosome assembly protein 1 like 4	Y*
NARS1	NP_004530	4677	asparaginyl-tRNA synthetase 1	Y*
NCCRP1	NP_001001414	342897	NCCRP1, F-box associated domain containing	Y*
NCF1	NP_000256	653361	neutrophil cytosolic factor 1	Y*
NCF2	NP_001121123	4688	neutrophil cytosolic factor 2	Y*
NCK1	NP_006144	4690	NCK adaptor protein 1	Y*
NCKAP1	NP_995314	10787	NCK associated protein 1	Y*
NEK2	NP_002488	4751	NIMA related kinase 2	Y*
NEU2	NP_005374	4759	neuraminidase 2	Y*
NHLRC2	NP_940916	374354	NHL repeat containing 2	Y*
NIF3L1	NP_068596	60491	NGG1 interacting factor 3 like 1	Y*
NLRC4	NP_067032	58484	NLR family CARD domain containing 4	Y*
NPLOC4	NP_060391	55666	NPL4 homolog, ubiquitin recognition factor	Y*
NQO2	NP_000895	4835	N-ribosyldihydronicotinamide:quinone reductase 2	Y*
NT5C2	NP_036361	22978	5'-nucleotidase, cytosolic II	Y*
NUB1	NP_057202	51667	negative regulator of ubiquitin like proteins 1	Y*
NUDT4	NP_061967	11163	nudix hydrolase 4	Y*
NUDT9	NP_932155	53343	nudix hydrolase 9	Y*
OSBPL11	NP_073613	114885	oxysterol binding protein like 11	Y*
OSBPL2	NP_653081	9885	oxysterol binding protein like 2	Y*
OTUD6B	NP_057107	51633	OTU deubiquitinase 6B	Y*
OXCT1	NP_000427	5019	3-oxoacid CoA-transferase 1	Y*
PACSIN2	NP_009160	11252	protein kinase C and casein kinase substrate in neurons 2	Y*
PADI2	NP_031391	11240	peptidyl arginine deiminase 2	Y*
PAICS	NP_006443	10606	phosphoribosylaminoimidazole carboxylase and phosphoribosylaminoimidazolesuccinocarboxamide synthase	Y*
PAPSS1	NP_005434	9061	3'-phosphoadenosine 5'-phosphosulfate synthase 1	Y*
PARPBP	NP_060385	55010	PARP1 binding protein	Y*
PCYT1A	NP_005008	5130	phosphate cytidylyltransferase 1A, choline	Y*
PCYT2	NP_002852	5833	phosphate cytidylyltransferase 2, ethanolamine	Y*
PFDN4	NP_002614	5203	prefoldin subunit 4	Y*
PFKFB2	NP_001018063	5208	6-phosphofructo-2-kinase/fructose-2,6-biphosphatase 2	Y*
PFKFB4	NP_004558	5210	6-phosphofructo-2-kinase/fructose-2,6-biphosphatase 4	Y*
PHGDH	NP_006614	26227	phosphoglycerate dehydrogenase	Y*
PI3	NP_002629	5266	peptidase inhibitor 3	Y*
PIK3AP1	NP_689522	118788	phosphoinositide-3-kinase adaptor protein 1	Y*
PIK3C3	NP_002638	5289	phosphatidylinositol 3-kinase catalytic subunit type 3	Y*
PIP4K2C	NP_079055	79837	phosphatidylinositol-5-phosphate 4-kinase type 2 gamma	Y*
PLPBP	NP_009129	11212	pyridoxal phosphate binding protein	Y*
PPL	NP_002696	5493	periplakin	Y*
PPP1CC	NP_002701	5501	protein phosphatase 1 catalytic subunit gamma	Y*
PPP1R2	NP_006232	5504	protein phosphatase 1 regulatory inhibitor subunit 2	Y*
PPP1R7	NP_002703	5510	protein phosphatase 1 regulatory subunit 7	Y*
PPP2R1B	NP_002707	5519	protein phosphatase 2 scaffold subunit Abeta	Y*
PPP2R2C	NP_870991	5522	protein phosphatase 2 regulatory subunit Bgamma	Y*
PPP5C	NP_006238	5536	protein phosphatase 5 catalytic subunit	Y*
PRKCB	NP_997700	5579	protein kinase C beta	Y*
PRKCD	NP_997704	5580	protein kinase C delta	Y*
PSMB7	NP_002790	5695	proteasome 20S subunit beta 7	Y*
PSMC3	NP_002795	5702	proteasome 26S subunit, ATPase 3	Y*
PSMC6	NP_002797	5706	proteasome 26S subunit, ATPase 6	Y*
PSMD11	NP_002806	5717	proteasome 26S subunit, non-ATPase 11	Y*
PTGR1	NP_036344	22949	prostaglandin reductase 1	Y*
PTK2B	NP_775268	2185	protein tyrosine kinase 2 beta	Y*
QARS1	NP_005042	5859	glutaminyl-tRNA synthetase 1	Y*
RAB11B	NP_004209	9230	RAB11B, member RAS oncogene family	Y*
RAB15	NP_941959	376267	RAB15, member RAS oncogene family	Y*
RAB4B	NP_057238	53916	RAB4B, member RAS oncogene family	Y*
RAB9A	NP_004242	9367	RAB9A, member RAS oncogene family	Y*
RABGGTA	NP_004572	5875	Rab geranylgeranyltransferase subunit alpha	Y*
RALB	NP_002872	5899	RAS like proto-oncogene B	Y*
RALBP1	NP_006779	10928	ralA binding protein 1	Y*
RASSF2	NP_739580	9770	Ras association domain family member 2	Y*
RBCK1	NP_112506	10616	RANBP2-type and C3HC4-type zinc finger containing 1	Y*
RBP7	NP_443192	116362	retinol binding protein 7	Y*
RIMKLA	NP_775913	284716	ribosomal modification protein rimK like family member A	Y*
RRAGB	NP_057740	10325	Ras related GTP binding B	Y*
SASH3	NP_061863	54440	SAM and SH3 domain containing 3	Y*
SCIN	NP_001106177	85477	scinderin	Y*
SEPTIN5	NP_002679	5413	septin 5	Y*
SEPTIN6	NP_665801	23157	septin 6	Y*
SEPTIN8	NP_001092281	23176	septin 8	Y*
SERPINB10	NP_005015	5273	serpin family B member 10	Y*
SH3BGRL	NP_003013	6451	SH3 domain binding glutamate rich protein like	Y*
SHPK	NP_037408	23729	sedoheptulokinase	Y*
SIRT5	NP_112534	23408	sirtuin 5	Y*
SKAP2	NP_003921	8935	src kinase associated phosphoprotein 2	Y*
SLC13A2	NP_003975	9058	solute carrier family 13 member 2	Y*
SLC25A5	NP_001143	292	solute carrier family 25 member 5	Y*
SNAPIN	NP_036569	23557	SNAP associated protein	Y*
SPAG17	NP_996879	200162	sperm associated antigen 17	Y*
SPATA31A7	NP_056482	26165	SPATA31 subfamily A member 7	Y*
SPR	NP_003115	6697	sepiapterin reductase	Y*
STAM	NP_003464	8027	signal transducing adaptor molecule	Y*
STBD1	NP_003934	8987	starch binding domain 1	Y*
TNFAIP1	NP_066960	7126	TNF alpha induced protein 1	Y*
TNFAIP2	NP_006282	7127	TNF alpha induced protein 2	Y*
TPD52L1	NP_001003395	7164	TPD52 like 1	Y*
TRAPPC3	NP_055223	27095	trafficking protein particle complex subunit 3	Y*
TRIOBP	NP_008963	11078	TRIO and F-actin binding protein	Y*
TRIP10	NP_004231	9322	thyroid hormone receptor interactor 10	Y*
TTLL12	NP_055955	23170	tubulin tyrosine ligase like 12	Y*
TYMP	NP_001107228	1890	thymidine phosphorylase	Y*
UBA7	NP_003326	7318	ubiquitin like modifier activating enzyme 7	Y*
VAV1	NP_005419	7409	vav guanine nucleotide exchange factor 1	Y*
VBP1	NP_003363	7411	VHL binding protein 1	Y*
VPS26A	NP_001030337	9559	VPS26 retromer complex component A	Y*
VPS36	NP_057159	51028	vacuolar protein sorting 36 homolog	Y*
VPS37B	NP_078943	79720	VPS37B subunit of ESCRT-I	Y*
WARS1	NP_776049	7453	tryptophanyl-tRNA synthetase 1	Y*
WDFY1	NP_065881	57590	WD repeat and FYVE domain containing 1	Y*
YARS1	NP_003671	8565	tyrosyl-tRNA synthetase 1	Y*
ZBTB8OS	NP_848642	339487	zinc finger and BTB domain containing 8 opposite strand	Y*
ZNF185	NP_009081	7739	zinc finger protein 185 with LIM domain	Y*
A1BG	NP_570602	1	alpha-1-B glycoprotein	Y
A2M	NP_000005	2	alpha-2-macroglobulin	Y
A2ML1	NP_653271	144568	alpha-2-macroglobulin like 1	Y
ABHD14A	NP_056222	25864	abhydrolase domain containing 14A	Y
ACP3	NP_001090	55	acid phosphatase 3	Y
ACP5	NP_001104506	54	acid phosphatase 5, tartrate resistant	Y
ACSL1	NP_001986	2180	acyl-CoA synthetase long chain family member 1	Y
ACTB	NP_001092	60	actin beta	Y
ACTBL2	NP_001017992	345651	actin beta like 2	Y
ACTR3B	NP_001035225	57180	actin related protein 3B	Y
ADA2	NP_803124	51816	adenosine deaminase 2	Y
ADAM10	NP_001101	102	ADAM metallopeptidase domain 10	Y
ADAM15	NP_997080	8751	ADAM metallopeptidase domain 15	Y
ADAMTS3	NP_055058	9508	ADAM metallopeptidase with thrombospondin type 1 motif 3	Y
ADD1	NP_789771	118	adducin 1	Y
ADD3	NP_001112	120	adducin 3	Y
ADGRG1	NP_958932	9289	adhesion G protein-coupled receptor G1	Y
ADH5	NP_000662	128	alcohol dehydrogenase 5 (class III), chi polypeptide	Y
ADIRF	NP_006820	10974	adipogenesis regulatory factor	Y
ADK	NP_001114	132	adenosine kinase	Y
ADPRS	NP_060295	54936	ADP-ribosylserine hydrolase	Y
ADRM1	NP_783163	11047	ADRM1 26S proteasome ubiquitin receptor	Y
ADSL	NP_000017	158	adenylosuccinate lyase	Y
ADSS2	NP_001117	159	adenylosuccinate synthase 2	Y
AEBP1	NP_001120	165	AE binding protein 1	Y
AFM	NP_001124	173	afamin	Y
AGA	NP_000018	175	aspartylglucosaminidase	Y
AGFG1	NP_004495	3267	ArfGAP with FG repeats 1	Y
AGL	NP_000019	178	amylo-alpha-1, 6-glucosidase, 4-alpha-glucanotransferase	Y
AGO1	NP_036331	26523	argonaute RISC component 1	Y
AGR3	NP_789783	155465	anterior gradient 3, protein disulphide isomerase family member	Y
AGRN	NP_940978	375790	agrin	Y
AGT	NP_000020	183	angiotensinogen	Y
AHCY	NP_000678	191	adenosylhomocysteinase	Y
AHNAK	NP_001611	79026	AHNAK nucleoprotein	Y
AHNAK2	NP_612429	113146	AHNAK nucleoprotein 2	Y
AHSA1	NP_036243	10598	activator of HSP90 ATPase activity 1	Y
AHSG	NP_001613	197	alpha 2-HS glycoprotein	Y
AIP	NP_003968	9049	aryl hydrocarbon receptor interacting protein	Y
AKR1A1	NP_697021	10327	aldo-keto reductase family 1 member A1	Y
AP1M1	NP_115882	8907	adaptor related protein complex 1 subunit mu 1	Y
AQR	NP_055506	9716	aquarius intron-binding spliceosomal factor	Y
ARHGDIA	NP_004300	396	Rho GDP dissociation inhibitor alpha	Y
ARHGDIB	NP_001166	397	Rho GDP dissociation inhibitor beta	Y
BMP3	NP_001192	651	bone morphogenetic protein 3	Y
CTNNB1	NP_001091679	1499	catenin beta 1	Y
CTTN	NP_612632	2017	cortactin	Y
DYNLL1	NP_001032584	8655	dynein light chain LC8-type 1	Y
EIF2S1	NP_004085	1965	eukaryotic translation initiation factor 2 subunit alpha	Y
HGS	NP_004703	9146	hepatocyte growth factor-regulated tyrosine kinase substrate	Y
IGFALS	NP_004961	3483	insulin like growth factor binding protein acid labile subunit	Y
IL1RAP	NP_608273	3556	interleukin 1 receptor accessory protein	Y
KIF5B	NP_004512	3799	kinesin family member 5B	Y
LAMP1	NP_005552	3916	lysosomal associated membrane protein 1	Y
MARK3	NP_002367	4140	microtubule affinity regulating kinase 3	Y
METAP2	NP_006829	10988	methionyl aminopeptidase 2	Y
MSLN	NP_037536	10232	mesothelin	Y
MST1	NP_066278	4485	macrophage stimulating 1	Y
NUMB	NP_001005745	8650	NUMB endocytic adaptor protein	Y
PA2G4	NP_006182	5036	proliferation-associated 2G4	Y
PAK1	NP_001122092	5058	p21 (RAC1) activated kinase 1	Y
PGAM1	NP_002620	5223	phosphoglycerate mutase 1	Y
PKN1	NP_998725	5585	protein kinase N1	Y
PPM1L	NP_640338	151742	protein phosphatase, Mg2+/Mn2+ dependent 1L	Y
PPP1R12A	NP_002471	4659	protein phosphatase 1 regulatory subunit 12A	Y
RAB1A	NP_004152	5861	RAB1A, member RAS oncogene family	Y
RACK1	NP_006089	10399	receptor for activated C kinase 1	Y
RAF1	NP_002871	5894	Raf-1 proto-oncogene, serine/threonine kinase	Y
S100A14	NP_065723	57402	S100 calcium binding protein A14	Y
SCYL2	NP_060458	55681	SCY1 like pseudokinase 2	Y
SEMA3G	NP_064548	56920	semaphorin 3G	Y
SH3GLB1	NP_057093	51100	SH3 domain containing GRB2 like, endophilin B1	Y
ST6GALNAC1	NP_060884	55808	ST6 N-acetylgalactosaminide alpha-2,6-sialyltransferase 1	Y
STAT1	NP_644671	6772	signal transducer and activator of transcription 1	Y
STAT3	NP_998827	6774	signal transducer and activator of transcription 3	Y
STAT5A	NP_003143	6776	signal transducer and activator of transcription 5A	Y
STAT6	NP_003144	6778	signal transducer and activator of transcription 6	Y
STMN1	NP_981946	3925	stathmin 1	Y
TAOK1	NP_065842	57551	TAO kinase 1	Y
TNFRSF19	NP_683760	55504	TNF receptor superfamily member 19	Y
UBE2V1	NP_001027459	7335	ubiquitin conjugating enzyme E2 V1	Y
AKAP12	NP_653080	9590	A-kinase anchoring protein 12	Y
AKT2	NP_001617	208	AKT serine/threonine kinase 2	Y
ALAD	NP_000022	210	aminolevulinate dehydratase	Y
ALB	NP_000468	213	albumin	Y
BUB3	NP_001007794	9184	BUB3 mitotic checkpoint protein	Y
CAMKK2	NP_705720	10645	calcium/calmodulin dependent protein kinase kinase 2	Y
CCDC6	NP_005427	8030	coiled-coil domain containing 6	Y
CDH1	NP_004351	999	cadherin 1	Y
CDK1	NP_001777	983	cyclin dependent kinase 1	Y
CFL1	NP_005498	1072	cofilin 1	Y
CPB2	NP_001863	1361	carboxypeptidase B2	Y
EEF1A1	NP_001393	1915	eukaryotic translation elongation factor 1 alpha 1	Y
EIF4G1	NP_937887	1981	eukaryotic translation initiation factor 4 gamma 1	Y
FOLH1	NP_001014986	2346	folate hydrolase 1	Y
GC	NP_000574	2638	GC vitamin D binding protein	Y
H2AX	NP_002096	3014	H2A.X variant histone	Y
HSP90AA1	NP_005339	3320	heat shock protein 90 alpha family class A member 1	Y
IQGAP1	NP_003861	8826	IQ motif containing GTPase activating protein 1	Y
KRT16	NP_005548	3868	keratin 16	Y
KRT6A	NP_005545	3853	keratin 6A	Y
KRT6B	NP_005546	3854	keratin 6B	Y
LOX	NP_002308	4015	lysyl oxidase	Y
LTBP3	NP_066548	4054	latent transforming growth factor beta binding protein 3	Y
MACROH2A1	NP_004884	9555	macroH2A.1 histone	Y
MAPRE2	NP_055083	10982	microtubule associated protein RP/EB family member 2	Y
MYH7	NP_000248	4625	myosin heavy chain 7	Y
PACS1	NP_060496	55690	phosphofurin acidic cluster sorting protein 1	Y
RAB27A	NP_899059	5873	RAB27A, member RAS oncogene family	Y
SLC25A4	NP_001142	291	solute carrier family 25 member 4	Y
SLC6A14	NP_009162	11254	solute carrier family 6 member 14	Y
SPARCL1	NP_004675	8404	SPARC like 1	Y
TGFB2	NP_003229	7042	transforming growth factor beta 2	Y
TNFSF13	NP_742084	8741	TNF superfamily member 13	Y
VASP	NP_003361	7408	vasodilator stimulated phosphoprotein	Y
ALDH16A1	NP_699160	126133	aldehyde dehydrogenase 16 family member A1	Y
ALDH1A1	NP_000680	216	aldehyde dehydrogenase 1 family member A1	Y
ALDH2	NP_000681	217	aldehyde dehydrogenase 2 family member	Y
ALDH7A1	NP_001173	501	aldehyde dehydrogenase 7 family member A1	Y
ALK	NP_004295	238	ALK receptor tyrosine kinase	Y
AMBP	NP_001624	259	alpha-1-microglobulin/bikunin precursor	Y
AMPD3	NP_001020561	272	adenosine monophosphate deaminase 3	Y
ANGPT1	NP_001137	284	angiopoietin 1	Y
ANPEP	NP_001141	290	alanyl aminopeptidase, membrane	Y
ANXA7	NP_004025	310	annexin A7	Y
APCS	NP_001630	325	amyloid P component, serum	Y
APLP2	NP_001633	334	amyloid beta precursor like protein 2	Y
APOB	NP_000375	338	apolipoprotein B	Y
APOD	NP_001638	347	apolipoprotein D	Y
APOH	NP_000033	350	apolipoprotein H	Y
APOL1	NP_663318	8542	apolipoprotein L1	Y
APP	NP_958817	351	amyloid beta precursor protein	Y
ARPC2	NP_005722	10109	actin related protein 2/3 complex subunit 2	Y
ASAH1	NP_001120977	427	N-acylsphingosine amidohydrolase 1	Y
ASPH	NP_004309	444	aspartate beta-hydroxylase	Y
ATIC	NP_004035	471	5-aminoimidazole-4-carboxamide ribonucleotide formyltransferase/IMP cyclohydrolase	Y
ATP2A1	NP_004311	487	ATPase sarcoplasmic/endoplasmic reticulum Ca2+ transporting 1	Y
ATP2A2	NP_733765	488	ATPase sarcoplasmic/endoplasmic reticulum Ca2+ transporting 2	Y
ATP6AP1	NP_001174	537	ATPase H+ transporting accessory protein 1	Y
ATP6V1A	NP_001681	523	ATPase H+ transporting V1 subunit A	Y
ATP6V1B1	NP_001683	525	ATPase H+ transporting V1 subunit B1	Y
ATP6V1B2	NP_001684	526	ATPase H+ transporting V1 subunit B2	Y
ATRN	NP_647538	8455	attractin	Y
AZGP1	NP_001176	563	alpha-2-glycoprotein 1, zinc-binding	Y
AZU1	NP_001691	566	azurocidin 1	Y
BCAN	NP_068767	63827	brevican	Y
BID	NP_932070	637	BH3 interacting domain death agonist	Y
BPGM	NP_954655	669	bisphosphoglycerate mutase	Y
BTF3	NP_001198	689	basic transcription factor 3	Y
C1QTNF3	NP_112207	114899	C1q and TNF related 3	Y
C1R	NP_001724	715	complement C1r	Y
C1RL	NP_057630	51279	complement C1r subcomponent like	Y
C1S	NP_958850	716	complement C1s	Y
C2	NP_000054	717	complement C2	Y
C3	NP_000055	718	complement C3	Y
C4BPA	NP_000706	722	complement component 4 binding protein alpha	Y
C5	NP_001726	727	complement C5	Y
C6	NP_001108603	729	complement C6	Y
C7	NP_000578	730	complement C7	Y
C8A	NP_000553	731	complement C8 alpha chain	Y
C8B	NP_000057	732	complement C8 beta chain	Y
C9	NP_001728	735	complement C9	Y
CALML3	NP_005176	810	calmodulin like 3	Y
CALR	NP_004334	811	calreticulin	Y
CALU	NP_001210	813	calumenin	Y
CAP1	NP_001099000	10487	cyclase associated actin cytoskeleton regulatory protein 1	Y
CAPG	NP_001738	822	capping actin protein, gelsolin like	Y
CAPN1	NP_005177	823	calpain 1	Y
CAT	NP_001743	847	catalase	Y
CBL	NP_005179	867	Cbl proto-oncogene	Y
CD109	NP_598000	135228	CD109 molecule	Y
CD14	NP_001035110	929	CD14 molecule	Y
CD44	NP_001001391	960	CD44 molecule (Indian blood group)	Y
CD58	NP_001770	965	CD58 molecule	Y
CD59	NP_001120699	966	CD59 molecule (CD59 blood group)	Y
CD74	NP_001020330	972	CD74 molecule	Y
CDCP1	NP_073753	64866	CUB domain containing protein 1	Y
CEACAM1	NP_001020083	634	CEA cell adhesion molecule 1	Y
CEACAM6	NP_002474	4680	CEA cell adhesion molecule 6	Y
CEACAM8	NP_001807	1088	CEA cell adhesion molecule 8	Y
CELSR2	NP_001399	1952	cadherin EGF LAG seven-pass G-type receptor 2	Y
CHD2	NP_001262	1106	chromodomain helicase DNA binding protein 2	Y
CHST8	NP_001121368	64377	carbohydrate sulfotransferase 8	Y
CLCA4	NP_036260	22802	chloride channel accessory 4	Y
CLTC	NP_004850	1213	clathrin heavy chain	Y
COL14A1	NP_066933	7373	collagen type XIV alpha 1 chain	Y
COL18A1	NP_085059	80781	collagen type XVIII alpha 1 chain	Y
COL1A1	NP_000079	1277	collagen type I alpha 1 chain	Y
COL21A1	NP_110447	81578	collagen type XXI alpha 1 chain	Y
COL6A1	NP_001839	1291	collagen type VI alpha 1 chain	Y
COL6A2	NP_001840	1292	collagen type VI alpha 2 chain	Y
CP	NP_000087	1356	ceruloplasmin	Y
CPD	NP_001295	1362	carboxypeptidase D	Y
CPE	NP_001864	1363	carboxypeptidase E	Y
CPM	NP_001005502	1368	carboxypeptidase M	Y
CPNE3	NP_003900	8895	copine 3	Y
CR1	NP_000642	1378	complement C3b/C4b receptor 1 (Knops blood group)	Y
CRISP3	NP_006052	10321	cysteine rich secretory protein 3	Y
CRLF3	NP_057070	51379	cytokine receptor like factor 3	Y
CRYZ	NP_001880	1429	crystallin zeta	Y
CTBS	NP_004379	1486	chitobiase	Y
CTHRC1	NP_612464	115908	collagen triple helix repeat containing 1	Y
CTSC	NP_001805	1075	cathepsin C	Y
CTSD	NP_001900	1509	cathepsin D	Y
CTSF	NP_003784	8722	cathepsin F	Y
CTSL	NP_666023	1514	cathepsin L	Y
CTSZ	NP_001327	1522	cathepsin Z	Y
CUL3	NP_003581	8452	cullin 3	Y
CUL4B	NP_001073341	8450	cullin 4B	Y
DCN	NP_598010	1634	decorin	Y
DCPS	NP_054745	28960	decapping enzyme, scavenger	Y
DDAH2	NP_039268	23564	dimethylarginine dimethylaminohydrolase 2	Y
DDX17	NP_001091974	10521	DEAD-box helicase 17	Y
DKK3	NP_001018067	27122	dickkopf WNT signaling pathway inhibitor 3	Y
DLD	NP_000099	1738	dihydrolipoamide dehydrogenase	Y
DLG1	NP_001091894	1739	discs large MAGUK scaffold protein 1	Y
DNAJA2	NP_005871	10294	DnaJ heat shock protein family (Hsp40) member A2	Y
DNAJB1	NP_006136	3337	DnaJ heat shock protein family (Hsp40) member B1	Y
DNAJB11	NP_057390	51726	DnaJ heat shock protein family (Hsp40) member B11	Y
DNASE2	NP_001366	1777	deoxyribonuclease 2, lysosomal	Y
DNM1L	NP_005681	10059	dynamin 1 like	Y
DNM2	NP_001005362	1785	dynamin 2	Y
DPP4	NP_001926	1803	dipeptidyl peptidase 4	Y
DPP7	NP_037511	29952	dipeptidyl peptidase 7	Y
DPYSL2	NP_001377	1808	dihydropyrimidinase like 2	Y
DSC2	NP_004940	1824	desmocollin 2	Y
DSC3	NP_077741	1825	desmocollin 3	Y
DSG1	NP_001933	1828	desmoglein 1	Y
DSG2	NP_001934	1829	desmoglein 2	Y
ECM1	NP_004416	1893	extracellular matrix protein 1	Y
EEF1G	NP_001395	1937	eukaryotic translation elongation factor 1 gamma	Y
EEF2	NP_001952	1938	eukaryotic translation elongation factor 2	Y
EFNA1	NP_004419	1942	ephrin A1	Y
EGLN1	NP_071334	54583	egl-9 family hypoxia inducible factor 1	Y
EIF4G2	NP_001036024	1982	eukaryotic translation initiation factor 4 gamma 2	Y
ENO2	NP_001966	2026	enolase 2	Y
EVI2B	NP_006486	2124	ecotropic viral integration site 2B	Y
EWSR1	NP_053733	2130	EWS RNA binding protein 1	Y
F11R	NP_058642	50848	F11 receptor	Y
F12	NP_000496	2161	coagulation factor XII	Y
F13A1	NP_000120	2162	coagulation factor XIII A chain	Y
F2	NP_000497	2147	coagulation factor II, thrombin	Y
F5	NP_000121	2153	coagulation factor V	Y
FAM3D	NP_620160	131177	FAM3 metabolism regulating signaling molecule D	Y
FAT2	NP_001438	2196	FAT atypical cadherin 2	Y
FBLN1	NP_001987	2192	fibulin 1	Y
FBLN2	NP_001989	2199	fibulin 2	Y
FBLN5	NP_006320	10516	fibulin 5	Y
FCGBP	NP_003881	8857	Fc gamma binding protein	Y
FCGR3B	NP_000561	2215	Fc gamma receptor IIIb	Y
FETUB	NP_055190	26998	fetuin B	Y
FGA	NP_068657	2243	fibrinogen alpha chain	Y
FGB	NP_005132	2244	fibrinogen beta chain	Y
FGG	NP_068656	2266	fibrinogen gamma chain	Y
FH	NP_000134	2271	fumarate hydratase	Y
FIGNL1	NP_001036227	63979	fidgetin like 1	Y
FLII	NP_002009	2314	FLII actin remodeling protein	Y
FLNA	NP_001104026	2316	filamin A	Y
FLNB	NP_001448	2317	filamin B	Y
FMOD	NP_002014	2331	fibromodulin	Y
FN1	NP_997643	2335	fibronectin 1	Y
FSTL1	NP_009016	11167	follistatin like 1	Y
FUBP1	NP_003893	8880	far upstream element binding protein 1	Y
FUS	NP_004951	2521	FUS RNA binding protein	Y
GAA	NP_001073272	2548	alpha glucosidase	Y
GALNT10	NP_938080	55568	polypeptide N-acetylgalactosaminyltransferase 10	Y
GALNT3	NP_004473	2591	polypeptide N-acetylgalactosaminyltransferase 3	Y
GAS6	NP_000811	2621	growth arrest specific 6	Y
GCA	NP_036330	25801	grancalcin	Y
GGH	NP_003869	8836	gamma-glutamyl hydrolase	Y
GLB1	NP_001073279	2720	galactosidase beta 1	Y
GLG1	NP_036333	2734	golgi glycoprotein 1	Y
GM2A	NP_000396	2760	ganglioside GM2 activator	Y
GMPS	NP_003866	8833	guanine monophosphate synthase	Y
GNS	NP_002067	2799	glucosamine (N-acetyl)-6-sulfatase	Y
GP2	NP_001493	2813	glycoprotein 2	Y
GPC1	NP_002072	2817	glypican 1	Y
GPI	NP_000166	2821	glucose-6-phosphate isomerase	Y
GPLD1	NP_001494	2822	glycosylphosphatidylinositol specific phospholipase D1	Y
GPRC5C	NP_061123	55890	G protein-coupled receptor class C group 5 member C	Y
GRN	NP_002078	2896	granulin precursor	Y
GSPT1	NP_002085	2935	G1 to S phase transition 1	Y
GYS1	NP_002094	2997	glycogen synthase 1	Y
H6PD	NP_004276	9563	hexose-6-phosphate dehydrogenase/glucose 1-dehydrogenase	Y
HADHA	NP_000173	3030	hydroxyacyl-CoA dehydrogenase trifunctional multienzyme complex subunit alpha	Y
HAL	NP_002099	3034	histidine ammonia-lyase	Y
HEXA	NP_000511	3073	hexosaminidase subunit alpha	Y
HEXB	NP_000512	3074	hexosaminidase subunit beta	Y
HK3	NP_002106	3101	hexokinase 3	Y
HLA-A	NP_002107	3105	major histocompatibility complex, class I, A	Y
HLA-B	NP_005505	3106	major histocompatibility complex, class I, B	Y
HLA-C	NP_002108	3107	major histocompatibility complex, class I, C	Y
HLA-E	NP_005507	3133	major histocompatibility complex, class I, E	Y
HLA-F	NP_001091949	3134	major histocompatibility complex, class I, F	Y
HMGCS1	NP_001091742	3157	3-hydroxy-3-methylglutaryl-CoA synthase 1	Y
HP	NP_001119574	3240	haptoglobin	Y
HPR	NP_066275	3250	haptoglobin-related protein	Y
HPX	NP_000604	3263	hemopexin	Y
HRAS	NP_789765	3265	HRas proto-oncogene, GTPase	Y
HRG	NP_000403	3273	histidine rich glycoprotein	Y
HSPA1B	NP_005337	3304	heat shock protein family A (Hsp70) member 1B	Y
HSPA1L	NP_005518	3305	heat shock protein family A (Hsp70) member 1 like	Y
HSPA2	NP_068814	3306	heat shock protein family A (Hsp70) member 2	Y
HSPA4	NP_002145	3308	heat shock protein family A (Hsp70) member 4	Y
HSPA8	NP_006588	3312	heat shock protein family A (Hsp70) member 8	Y
HSPD1	NP_955472	3329	heat shock protein family D (Hsp60) member 1	Y
HSPG2	NP_005520	3339	heparan sulfate proteoglycan 2	Y
HSPH1	NP_006635	10808	heat shock protein family H (Hsp110) member 1	Y
HYAL1	NP_695014	3373	hyaluronidase 1	Y
HYOU1	NP_006380	10525	hypoxia up-regulated 1	Y
ICAM1	NP_000192	3383	intercellular adhesion molecule 1	Y
ICAM3	NP_002153	3385	intercellular adhesion molecule 3	Y
IDE	NP_004960	3416	insulin degrading enzyme	Y
IGF2R	NP_000867	3482	insulin like growth factor 2 receptor	Y
IGFBP3	NP_001013416	3486	insulin like growth factor binding protein 3	Y
IGSF8	NP_443100	93185	immunoglobulin superfamily member 8	Y
IL1A	NP_000566	3552	interleukin 1 alpha	Y
IL1RN	NP_776215	3557	interleukin 1 receptor antagonist	Y
IL6ST	NP_002175	3572	interleukin 6 cytokine family signal transducer	Y
IPO9	NP_060555	55705	importin 9	Y
ISLR	NP_958934	3671	immunoglobulin superfamily containing leucine rich repeat	Y
ITGB2	NP_001120963	3689	integrin subunit beta 2	Y
ITIH1	NP_002206	3697	inter-alpha-trypsin inhibitor heavy chain 1	Y
ITIH2	NP_002207	3698	inter-alpha-trypsin inhibitor heavy chain 2	Y
ITIH3	NP_002208	3699	inter-alpha-trypsin inhibitor heavy chain 3	Y
ITIH4	NP_002209	3700	inter-alpha-trypsin inhibitor heavy chain 4	Y
KIF13A	NP_001099037	63971	kinesin family member 13A	Y
KIF13B	NP_056069	23303	kinesin family member 13B	Y
KIF1B	NP_055889	23095	kinesin family member 1B	Y
KLK11	NP_006844	11012	kallikrein related peptidase 11	Y
KLK5	NP_001070960	25818	kallikrein related peptidase 5	Y
KLK6	NP_001012982	5653	kallikrein related peptidase 6	Y
KLKB1	NP_000883	3818	kallikrein B1	Y
KRT1	NP_006112	3848	keratin 1	Y
KRT10	NP_000412	3858	keratin 10	Y
KRT12	NP_000214	3859	keratin 12	Y
KRT9	NP_000217	3857	keratin 9	Y
KTN1	NP_004977	3895	kinectin 1	Y
LAMA3	NP_001121190	3909	laminin subunit alpha 3	Y
LAMA4	NP_001098676	3910	laminin subunit alpha 4	Y
LAMB2	NP_002283	3913	laminin subunit beta 2	Y
LAMC1	NP_002284	3915	laminin subunit gamma 1	Y
LAMC2	NP_061486	3918	laminin subunit gamma 2	Y
LCN2	NP_005555	3934	lipocalin 2	Y
LCP1	NP_002289	3936	lymphocyte cytosolic protein 1	Y
LDLR	NP_000518	3949	low density lipoprotein receptor	Y
LGALS3BP	NP_005558	3959	galectin 3 binding protein	Y
LGMN	NP_001008530	5641	legumain	Y
LMAN2	NP_006807	10960	lectin, mannose binding 2	Y
LMNA	NP_733822	4000	lamin A/C	Y
LMNB1	NP_005564	4001	lamin B1	Y
LRP2	NP_004516	4036	LDL receptor related protein 2	Y
LTBP1	NP_996826	4052	latent transforming growth factor beta binding protein 1	Y
LTF	NP_002334	4057	lactotransferrin	Y
LUM	NP_002336	4060	lumican	Y
LY75	NP_002340	4065	lymphocyte antigen 75	Y
LYPLA1	NP_006321	10434	lysophospholipase 1	Y
MACF1	NP_036222	23499	microtubule actin crosslinking factor 1	Y
MAN2A1	NP_002363	4124	mannosidase alpha class 2A member 1	Y
MAN2B1	NP_000519	4125	mannosidase alpha class 2B member 1	Y
MAP2K1	NP_002746	5604	mitogen-activated protein kinase kinase 1	Y
MATN4	NP_085080	8785	matrilin 4	Y
MDH1	NP_005908	4190	malate dehydrogenase 1	Y
MEFV	NP_000234	4210	MEFV innate immuity regulator, pyrin	Y
MGAT5	NP_002401	4249	alpha-1,6-mannosylglycoprotein 6-beta-N-acetylglucosaminyltransferase	Y
MGLL	NP_001003794	11343	monoglyceride lipase	Y
MINPP1	NP_004888	9562	multiple inositol-polyphosphate phosphatase 1	Y
MPO	NP_000241	4353	myeloperoxidase	Y
MUC16	NP_078966	94025	mucin 16, cell surface associated	Y
MYH1	NP_005954	4619	myosin heavy chain 1	Y
MYH11	NP_001035203	4629	myosin heavy chain 11	Y
MYH14	NP_001070654	79784	myosin heavy chain 14	Y
NAGA	NP_000253	4668	alpha-N-acetylgalactosaminidase	Y
NAGLU	NP_000254	4669	N-acetyl-alpha-glucosaminidase	Y
NAPB	NP_071363	63908	NSF attachment protein beta	Y
NCL	NP_005372	4691	nucleolin	Y
NDRG2	NP_963835	57447	NDRG family member 2	Y
NDST1	NP_001534	3340	N-deacetylase and N-sulfotransferase 1	Y
NEU1	NP_000425	4758	neuraminidase 1	Y
NPC2	NP_006423	10577	NPC intracellular cholesterol transporter 2	Y
NRP1	NP_003864	8829	neuropilin 1	Y
OLR1	NP_002534	4973	oxidized low density lipoprotein receptor 1	Y
OPLAH	NP_060040	26873	5-oxoprolinase, ATP-hydrolysing	Y
ORM1	NP_000598	5004	orosomucoid 1	Y
ORM2	NP_000599	5005	orosomucoid 2	Y
OSBPL1A	NP_060500	114876	oxysterol binding protein like 1A	Y
PAM	NP_000910	5066	peptidylglycine alpha-amidating monooxygenase	Y
PANK2	NP_705902	80025	pantothenate kinase 2	Y
PCDHA11	NP_114067	56138	protocadherin alpha 11	Y
PCDHA13	NP_114071	56136	protocadherin alpha 13	Y
PCDHGB1	NP_115266	56104	protocadherin gamma subfamily B, 1	Y
PCDHGB7	NP_115272	56099	protocadherin gamma subfamily B, 7	Y
PCNA	NP_872590	5111	proliferating cell nuclear antigen	Y
PER2	NP_073728	8864	period circadian regulator 2	Y
PFAS	NP_036525	5198	phosphoribosylformylglycinamidine synthase	Y
PFN1	NP_005013	5216	profilin 1	Y
PGM1	NP_002624	5236	phosphoglucomutase 1	Y
PICALM	NP_001008660	8301	phosphatidylinositol binding clathrin assembly protein	Y
PIGR	NP_002635	5284	polymeric immunoglobulin receptor	Y
PLA2R1	NP_001007268	22925	phospholipase A2 receptor 1	Y
PLCB2	NP_004564	5330	phospholipase C beta 2	Y
PLG	NP_000292	5340	plasminogen	Y
PLOD3	NP_001075	8985	procollagen-lysine,2-oxoglutarate 5-dioxygenase 3	Y
PLTP	NP_006218	5360	phospholipid transfer protein	Y
PLXNB2	NP_036533	23654	plexin B2	Y
PON1	NP_000437	5444	paraoxonase 1	Y
PON3	NP_000931	5446	paraoxonase 3	Y
PPIA	NP_066953	5478	peptidylprolyl isomerase A	Y
PPIB	NP_000933	5479	peptidylprolyl isomerase B	Y
PPP2R1A	NP_055040	5518	protein phosphatase 2 scaffold subunit Aalpha	Y
PPP2R5A	NP_006234	5525	protein phosphatase 2 regulatory subunit B'alpha	Y
PPP3CA	NP_000935	5530	protein phosphatase 3 catalytic subunit alpha	Y
PPT1	NP_000301	5538	palmitoyl-protein thioesterase 1	Y
PRCP	NP_955450	5547	prolylcarboxypeptidase	Y
PRELP	NP_958505	5549	proline and arginine rich end leucine rich repeat protein	Y
PREX1	NP_065871	57580	phosphatidylinositol-3,4,5-trisphosphate dependent Rac exchange factor 1	Y
PROC	NP_000303	5624	protein C, inactivator of coagulation factors Va and VIIIa	Y
PROS1	NP_000304	5627	protein S	Y
PRTN3	NP_002768	5657	proteinase 3	Y
PSAP	NP_001035931	5660	prosaposin	Y
PSCA	NP_005663	8000	prostate stem cell antigen	Y
PSMA5	NP_002781	5686	proteasome 20S subunit alpha 5	Y
PSMB4	NP_002787	5692	proteasome 20S subunit beta 4	Y
PTGDS	NP_000945	5730	prostaglandin D2 synthase	Y
PTK7	NP_690621	5754	protein tyrosine kinase 7 (inactive)	Y
PTPN11	NP_002825	5781	protein tyrosine phosphatase non-receptor type 11	Y
PTPN12	NP_002826	5782	protein tyrosine phosphatase non-receptor type 12	Y
PTPRF	NP_002831	5792	protein tyrosine phosphatase receptor type F	Y
PTPRJ	NP_002834	5795	protein tyrosine phosphatase receptor type J	Y
PTPRK	NP_001129120	5796	protein tyrosine phosphatase receptor type K	Y
PTPRN2	NP_002838	5799	protein tyrosine phosphatase receptor type N2	Y
PTPRS	NP_570924	5802	protein tyrosine phosphatase receptor type S	Y
PYGL	NP_002854	5836	glycogen phosphorylase L	Y
PZP	NP_002855	5858	PZP alpha-2-macroglobulin like	Y
QPCT	NP_036545	25797	glutaminyl-peptide cyclotransferase	Y
RAB5C	NP_958842	5878	RAB5C, member RAS oncogene family	Y
RDX	NP_002897	5962	radixin	Y
RNASE2	NP_002925	6036	ribonuclease A family member 2	Y
RNASET2	NP_003721	8635	ribonuclease T2	Y
RPA3	NP_002938	6119	replication protein A3	Y
RPL12	NP_000967	6136	ribosomal protein L12	Y
RRAGC	NP_071440	64121	Ras related GTP binding C	Y
SAA4	NP_006503	6291	serum amyloid A4, constitutive	Y
SAMSN1	NP_071419	64092	SAM domain, SH3 domain and nuclear localization signals 1	Y
SCEL	NP_003834	8796	sciellin	Y
SERPINA1	NP_001121179	5265	serpin family A member 1	Y
SERPINA11	NP_001073920	256394	serpin family A member 11	Y
SERPINA3	NP_001076	12	serpin family A member 3	Y
SERPINA4	NP_006206	5267	serpin family A member 4	Y
SERPINA6	NP_001747	866	serpin family A member 6	Y
SERPINA7	NP_000345	6906	serpin family A member 7	Y
SERPINB1	NP_109591	1992	serpin family B member 1	Y
SERPINB12	NP_536722	89777	serpin family B member 12	Y
SERPINB8	NP_001027018	5271	serpin family B member 8	Y
SERPINC1	NP_000479	462	serpin family C member 1	Y
SERPIND1	NP_000176	3053	serpin family D member 1	Y
SERPINF1	NP_002606	5176	serpin family F member 1	Y
SERPINF2	NP_000925	5345	serpin family F member 2	Y
SERPING1	NP_001027466	710	serpin family G member 1	Y
SERPINI1	NP_001116224	5274	serpin family I member 1	Y
SGSH	NP_000190	6448	N-sulfoglucosamine sulfohydrolase	Y
SIGLEC5	NP_003821	8778	sialic acid binding Ig like lectin 5	Y
SIL1	NP_001032722	64374	SIL1 nucleotide exchange factor	Y
SIRPB1	NP_001077379	10326	signal regulatory protein beta 1	Y
SLC12A9	NP_064631	56996	solute carrier family 12 member 9	Y
SLC3A2	NP_002385	6520	solute carrier family 3 member 2	Y
SLIT3	NP_003053	6586	slit guidance ligand 3	Y
SLK	NP_055535	9748	STE20 like kinase	Y
SMPDL3A	NP_006705	10924	sphingomyelin phosphodiesterase acid like 3A	Y
SOD2	NP_001019637	6648	superoxide dismutase 2	Y
SOD3	NP_003093	6649	superoxide dismutase 3	Y
SORL1	NP_003096	6653	sortilin related receptor 1	Y
SORT1	NP_002950	6272	sortilin 1	Y
SOSTDC1	NP_056279	25928	sclerostin domain containing 1	Y
SPINT1	NP_857593	6692	serine peptidase inhibitor, Kunitz type 1	Y
SPINT2	NP_066925	10653	serine peptidase inhibitor, Kunitz type 2	Y
STK38	NP_009202	11329	serine/threonine kinase 38	Y
STOM	NP_004090	2040	stomatin	Y
STRN	NP_003153	6801	striatin	Y
STXBP3	NP_009200	6814	syntaxin binding protein 3	Y
SULT2B1	NP_004596	6820	sulfotransferase family 2B member 1	Y
SUMF1	NP_877437	285362	sulfatase modifying factor 1	Y
SVIL	NP_068506	6840	supervillin	Y
TACSTD2	NP_002344	4070	tumor associated calcium signal transducer 2	Y
TARDBP	NP_031401	23435	TAR DNA binding protein	Y
TBL1Y	NP_599021	90665	transducin beta like 1 Y-linked	Y
TCN1	NP_001053	6947	transcobalamin 1	Y
TF	NP_001054	7018	transferrin	Y
TGM1	NP_000350	7051	transglutaminase 1	Y
TGM3	NP_003236	7053	transglutaminase 3	Y
TGOLN2	NP_006455	10618	trans-golgi network protein 2	Y
THBS1	NP_003237	7057	thrombospondin 1	Y
TIMP1	NP_003245	7076	TIMP metallopeptidase inhibitor 1	Y
TLN1	NP_006280	7094	talin 1	Y
TLR2	NP_003255	7097	toll like receptor 2	Y
TNC	NP_002151	3371	tenascin C	Y
TOR2A	NP_001078816	27433	torsin family 2 member A	Y
TPM1	NP_001018008	7168	tropomyosin 1	Y
TPP2	NP_003282	7174	tripeptidyl peptidase 2	Y
TTN	NP_596869	7273	titin	Y
TTR	NP_000362	7276	transthyretin	Y
TUBB	NP_821133	203068	tubulin beta class I	Y
UBE2V2	NP_003341	7336	ubiquitin conjugating enzyme E2 V2	Y
UBE3A	NP_000453	7337	ubiquitin protein ligase E3A	Y
UBQLN2	NP_038472	29978	ubiquilin 2	Y
VAPA	NP_919415	9218	VAMP associated protein A	Y
VTN	NP_000629	7448	vitronectin	Y
YKT6	NP_006546	10652	YKT6 v-SNARE homolog	Y
YWHAB	NP_647539	7529	tyrosine 3-monooxygenase/tryptophan 5-monooxygenase activation protein beta	Y
YWHAG	NP_036611	7532	tyrosine 3-monooxygenase/tryptophan 5-monooxygenase activation protein gamma	Y
YWHAZ	NP_663723	7534	tyrosine 3-monooxygenase/tryptophan 5-monooxygenase activation protein zeta	Y
ZFYVE16	NP_001098721	9765	zinc finger FYVE-type containing 16	Y
AMY1C	NP_001008220	278	amylase alpha 1C	Y
ANGPTL1	NP_004664	9068	angiopoietin like 1	Y
ANOS1	NP_000207	3730	anosmin 1	Y
ANXA2	NP_001002858	302	annexin A2	Y
AP2B1	NP_001025177	163	adaptor related protein complex 2 subunit beta 1	Y
APBB1	NP_001155	322	amyloid beta precursor protein binding family B member 1	Y
APCDD1L	NP_699191	164284	APC down-regulated 1 like	Y
APEX1	NP_542380	328	apurinic/apyrimidinic endodeoxyribonuclease 1	Y
APMAP	NP_065392	57136	adipocyte plasma membrane associated protein	Y
APOA1	NP_000030	335	apolipoprotein A1	Y
APOA2	NP_001634	336	apolipoprotein A2	Y
APOC3	NP_000031	345	apolipoprotein C3	Y
APOE	NP_000032	348	apolipoprotein E	Y
ARAP1	NP_001035207	116985	ArfGAP with RhoGAP domain, ankyrin repeat and PH domain 1	Y
ARCN1	NP_001646	372	archain 1	Y
ARHGAP25	NP_001007232	9938	Rho GTPase activating protein 25	Y
ARHGAP4	NP_001657	393	Rho GTPase activating protein 4	Y
ARHGAP45	NP_036424	23526	Rho GTPase activating protein 45	Y
ARHGAP9	NP_115885	64333	Rho GTPase activating protein 9	Y
ATP5F1A	NP_001001937	498	ATP synthase F1 subunit alpha	Y
ATP5F1B	NP_001677	506	ATP synthase F1 subunit beta	Y
B2M	NP_004039	567	beta-2-microglobulin	Y
B3GAT3	NP_036332	26229	beta-1,3-glucuronyltransferase 3	Y
B3GNT2	NP_006568	10678	UDP-GlcNAc:betaGal beta-1,3-N-acetylglucosaminyltransferase 2	Y
B3GNT3	NP_055071	10331	UDP-GlcNAc:betaGal beta-1,3-N-acetylglucosaminyltransferase 3	Y
B3GNT9	NP_171608	84752	UDP-GlcNAc:betaGal beta-1,3-N-acetylglucosaminyltransferase 9	Y
B4GALT1	NP_001488	2683	beta-1,4-galactosyltransferase 1	Y
B4GALT4	NP_997708	8702	beta-1,4-galactosyltransferase 4	Y
BAG3	NP_004272	9531	BAG cochaperone 3	Y
BASP1	NP_006308	10409	brain abundant membrane attached signal protein 1	Y
BCR	NP_067585	613	BCR activator of RhoGEF and GTPase	Y
BIN1	NP_647599	274	bridging integrator 1	Y
BPI	NP_001716	671	bactericidal permeability increasing protein	Y
BPIFA2	NP_542141	140683	BPI fold containing family A member 2	Y
BPIFB1	NP_149974	92747	BPI fold containing family B member 1	Y
BPIFB2	NP_079503	80341	BPI fold containing family B member 2	Y
BPIFB4	NP_872325	149954	BPI fold containing family B member 4	Y
BPNT2	NP_060283	54928	3'(2'), 5'-bisphosphate nucleotidase 2	Y
BPTF	NP_004450	2186	bromodomain PHD finger transcription factor	Y
C11orf54	NP_054758	28970	chromosome 11 open reading frame 54	Y
C1QC	NP_001107573	714	complement C1q C chain	Y
C4B	NP_001002029	721	complement C4B (Chido blood group)	Y
CA1	NP_001122303	759	carbonic anhydrase 1	Y
CA6	NP_001206	765	carbonic anhydrase 6	Y
CAMP	NP_004336	820	cathelicidin antimicrobial peptide	Y
CANT1	NP_620148	124583	calcium activated nucleotidase 1	Y
CANX	NP_001019820	821	calnexin	Y
CAPNS1	NP_001003962	826	calpain small subunit 1	Y
CAPZA1	NP_006126	829	capping actin protein of muscle Z-line subunit alpha 1	Y
CAST	NP_001035907	831	calpastatin	Y
CCL28	NP_683513	56477	C-C motif chemokine ligand 28	Y
CCT4	NP_006421	10575	chaperonin containing TCP1 subunit 4	Y
CD55	NP_001108224	1604	CD55 molecule (Cromer blood group)	Y
CD9	NP_001760	928	CD9 molecule	Y
CDC42	NP_001034891	998	cell division cycle 42	Y
CDSN	NP_001255	1041	corneodesmosin	Y
CEACAM5	NP_004354	1048	CEA cell adhesion molecule 5	Y
CEL	NP_001798	1056	carboxyl ester lipase	Y
CELF2	NP_001077060	10659	CUGBP Elav-like family member 2	Y
CENPF	NP_057427	1063	centromere protein F	Y
CEP170	NP_001035864	9859	centrosomal protein 170	Y
CES1	NP_001020366	1066	carboxylesterase 1	Y
CES2	NP_003860	8824	carboxylesterase 2	Y
CFB	NP_001701	629	complement factor B	Y
CFH	NP_000177	3075	complement factor H	Y
CFHR1	NP_002104	3078	complement factor H related 1	Y
CFI	NP_000195	3426	complement factor I	Y
CGREF1	NP_006560	10669	cell growth regulator with EF-hand domain 1	Y
CHAD	NP_001258	1101	chondroadherin	Y
CHI3L1	NP_001267	1116	chitinase 3 like 1	Y
CHI3L2	NP_001020370	1117	chitinase 3 like 2	Y
CHIT1	NP_003456	1118	chitinase 1	Y
CHMP5	NP_057494	51510	charged multivesicular body protein 5	Y
CHST1	NP_003645	8534	carbohydrate sulfotransferase 1	Y
CHST14	NP_569735	113189	carbohydrate sulfotransferase 14	Y
CHST6	NP_067628	4166	carbohydrate sulfotransferase 6	Y
CKAP5	NP_055571	9793	cytoskeleton associated protein 5	Y
CLEC3B	NP_003269	7123	C-type lectin domain family 3 member B	Y
CLINT1	NP_055481	9685	clathrin interactor 1	Y
CLIP1	NP_937883	6249	CAP-Gly domain containing linker protein 1	Y
CLSTN1	NP_001009566	22883	calsyntenin 1	Y
CLSTN3	NP_055533	9746	calsyntenin 3	Y
CLUL1	NP_954636	27098	clusterin like 1	Y
CNDP1	NP_116038	84735	carnosine dipeptidase 1	Y
COPA	NP_001091868	1314	COPI coat complex subunit alpha	Y
COPB2	NP_004757	9276	COPI coat complex subunit beta 2	Y
COPS2	NP_004227	9318	COP9 signalosome subunit 2	Y
CORO1A	NP_009005	11151	coronin 1A	Y
CORO1C	NP_055140	23603	coronin 1C	Y
CPA4	NP_057436	51200	carboxypeptidase A4	Y
CPN1	NP_001299	1369	carboxypeptidase N subunit 1	Y
CPQ	NP_057218	10404	carboxypeptidase Q	Y
CPXM2	NP_937791	119587	carboxypeptidase X, M14 family member 2	Y
CREB3L1	NP_443086	90993	cAMP responsive element binding protein 3 like 1	Y
CREG1	NP_003842	8804	cellular repressor of E1A stimulated genes 1	Y
CRISPLD2	NP_113664	83716	cysteine rich secretory protein LCCL domain containing 2	Y
CRTAP	NP_006362	10491	cartilage associated protein	Y
CRYAB	NP_001876	1410	crystallin alpha B	Y
CRYBG1	NP_001615	202	crystallin beta-gamma domain containing 1	Y
CRYM	NP_001879	1428	crystallin mu	Y
CST6	NP_001314	1474	cystatin E/M	Y
CSTB	NP_000091	1476	cystatin B	Y
CTPS1	NP_001896	1503	CTP synthase 1	Y
CTSB	NP_680093	1508	cathepsin B	Y
CTSG	NP_001902	1511	cathepsin G	Y
CTSO	NP_001325	1519	cathepsin O	Y
CTSS	NP_004070	1520	cathepsin S	Y
CTSV	NP_001324	1515	cathepsin V	Y
CUTA	NP_001014838	51596	cutA divalent cation tolerance homolog	Y
CYB5R3	NP_015565	1727	cytochrome b5 reductase 3	Y
CYBB	NP_000388	1536	cytochrome b-245 beta chain	Y
CYFIP1	NP_055423	23191	cytoplasmic FMR1 interacting protein 1	Y
DAG1	NP_004384	1605	dystroglycan 1	Y
DCD	NP_444513	117159	dermcidin	Y
DCTN1	NP_004073	1639	dynactin subunit 1	Y
DDB1	NP_001914	1642	damage specific DNA binding protein 1	Y
DDX3X	NP_001347	1654	DEAD-box helicase 3 X-linked	Y
DDX42	NP_987095	11325	DEAD-box helicase 42	Y
DES	NP_001918	1674	desmin	Y
DHX15	NP_001349	1665	DEAH-box helicase 15	Y
DHX9	NP_001348	1660	DExH-box helicase 9	Y
DIAPH1	NP_001073280	1729	diaphanous related formin 1	Y
DMBT1	NP_060049	1755	deleted in malignant brain tumors 1	Y
DNASE1	NP_005214	1773	deoxyribonuclease 1	Y
DSC1	NP_077739	1823	desmocollin 1	Y
DSG3	NP_001935	1830	desmoglein 3	Y
DYNC1I2	NP_001369	1781	dynein cytoplasmic 1 intermediate chain 2	Y
DYNC1LI1	NP_057225	51143	dynein cytoplasmic 1 light intermediate chain 1	Y
EFEMP2	NP_058634	30008	EGF containing fibulin extracellular matrix protein 2	Y
EGF	NP_001954	1950	epidermal growth factor	Y
EIF2S3	NP_001406	1968	eukaryotic translation initiation factor 2 subunit gamma	Y
EIF3D	NP_003744	8664	eukaryotic translation initiation factor 3 subunit D	Y
EIF3G	NP_003746	8666	eukaryotic translation initiation factor 3 subunit G	Y
EIF4A1	NP_001407	1973	eukaryotic translation initiation factor 4A1	Y
EIF4B	NP_001408	1975	eukaryotic translation initiation factor 4B	Y
EIF4E	NP_001959	1977	eukaryotic translation initiation factor 4E	Y
EIF4H	NP_114381	7458	eukaryotic translation initiation factor 4H	Y
EIF5A	NP_001961	1984	eukaryotic translation initiation factor 5A	Y
ELANE	NP_001963	1991	elastase, neutrophil expressed	Y
ELN	NP_001075221	2006	elastin	Y
EMC8	NP_006058	10328	ER membrane protein complex subunit 8	Y
EML3	NP_694997	256364	EMAP like 3	Y
EML4	NP_061936	27436	EMAP like 4	Y
ENO1	NP_001419	2023	enolase 1	Y
ENPP3	NP_005012	5169	ectonucleotide pyrophosphatase/phosphodiesterase 3	Y
EPB41	NP_976217	2035	erythrocyte membrane protein band 4.1	Y
EPCAM	NP_002345	4072	epithelial cell adhesion molecule	Y
EPHB4	NP_004435	2050	EPH receptor B4	Y
EPN1	NP_037465	29924	epsin 1	Y
EPRS1	NP_004437	2058	glutamyl-prolyl-tRNA synthetase 1	Y
ERAP1	NP_057526	51752	endoplasmic reticulum aminopeptidase 1	Y
ERO1A	NP_055399	30001	endoplasmic reticulum oxidoreductase 1 alpha	Y
ERO1B	NP_063944	56605	endoplasmic reticulum oxidoreductase 1 beta	Y
ERP44	NP_055866	23071	endoplasmic reticulum protein 44	Y
ETF1	NP_004721	2107	eukaryotic translation termination factor 1	Y
FADD	NP_003815	8772	Fas associated via death domain	Y
FAM20A	NP_060035	54757	FAM20A golgi associated secretory pathway pseudokinase	Y
FAM20C	NP_064608	56975	FAM20C golgi associated secretory pathway kinase	Y
FAM3B	NP_478066	54097	FAM3 metabolism regulating signaling molecule B	Y
FASN	NP_004095	2194	fatty acid synthase	Y
FCGR3A	NP_001121068	2214	Fc gamma receptor IIIa	Y
FCN1	NP_001994	2219	ficolin 1	Y
FCRL5	NP_112571	83416	Fc receptor like 5	Y
FGFRL1	NP_001004358	53834	fibroblast growth factor receptor like 1	Y
FLRT1	NP_037412	23769	fibronectin leucine rich transmembrane protein 1	Y
FPR1	NP_002020	2357	formyl peptide receptor 1	Y
FUCA1	NP_000138	2517	alpha-L-fucosidase 1	Y
FURIN	NP_002560	5045	furin, paired basic amino acid cleaving enzyme	Y
FUT3	NP_001091110	2525	fucosyltransferase 3 (Lewis blood group)	Y
FUT6	NP_001035791	2528	fucosyltransferase 6	Y
G3BP1	NP_938405	10146	G3BP stress granule assembly factor 1	Y
G3BP2	NP_987101	9908	G3BP stress granule assembly factor 2	Y
G6PD	NP_000393	2539	glucose-6-phosphate dehydrogenase	Y
GAL3ST2	NP_071417	64090	galactose-3-O-sulfotransferase 2	Y
GALC	NP_000144	2581	galactosylceramidase	Y
GALNT1	NP_065207	2589	polypeptide N-acetylgalactosaminyltransferase 1	Y
GALNT14	NP_078848	79623	polypeptide N-acetylgalactosaminyltransferase 14	Y
GALNT18	NP_940918	374378	polypeptide N-acetylgalactosaminyltransferase 18	Y
GALNT2	NP_004472	2590	polypeptide N-acetylgalactosaminyltransferase 2	Y
GALNT4	NP_003765	8693	polypeptide N-acetylgalactosaminyltransferase 4	Y
GALNT5	NP_055383	11227	polypeptide N-acetylgalactosaminyltransferase 5	Y
GALNT6	NP_009141	11226	polypeptide N-acetylgalactosaminyltransferase 6	Y
GAN	NP_071324	8139	gigaxonin	Y
GANAB	NP_938148	23193	glucosidase II alpha subunit	Y
GAPDH	NP_002037	2597	glyceraldehyde-3-phosphate dehydrogenase	Y
GCNT3	NP_004742	9245	glucosaminyl (N-acetyl) transferase 3, mucin type	Y
GGA3	NP_619525	23163	golgi associated, gamma adaptin ear containing, ARF binding protein 3	Y
GGT6	NP_001116362	124975	gamma-glutamyltransferase 6	Y
GIT2	NP_631940	9815	GIT ArfGAP 2	Y
GLA	NP_000160	2717	galactosidase alpha	Y
GLRX	NP_001112362	2745	glutaredoxin	Y
GLT8D1	NP_001010983	55830	glycosyltransferase 8 domain containing 1	Y
GNAI2	NP_002061	2771	G protein subunit alpha i2	Y
GNAI3	NP_006487	2773	G protein subunit alpha i3	Y
GNB1	NP_002065	2782	G protein subunit beta 1	Y
GNPTG	NP_115909	84572	N-acetylglucosamine-1-phosphate transferase subunit gamma	Y
GOLM1	NP_057632	51280	golgi membrane protein 1	Y
GOLM2	NP_816929	113201	golgi membrane protein 2	Y
GPC4	NP_001439	2239	glypican 4	Y
GPRC5B	NP_057319	51704	G protein-coupled receptor class C group 5 member B	Y
GREM2	NP_071914	64388	gremlin 2, DAN family BMP antagonist	Y
GSK3A	NP_063937	2931	glycogen synthase kinase 3 alpha	Y
GSN	NP_000168	2934	gelsolin	Y
GSTO1	NP_004823	9446	glutathione S-transferase omega 1	Y
GYG1	NP_004121	2992	glycogenin 1	Y
H2BC12	NP_542160	85236	H2B clustered histone 12	Y
H2BC21	NP_003519	8349	H2B clustered histone 21	Y
HAPLN1	NP_001875	1404	hyaluronan and proteoglycan link protein 1	Y
HBA2	NP_000508	3040	hemoglobin subunit alpha 2	Y
HBB	NP_000509	3043	hemoglobin subunit beta	Y
HBS1L	NP_006611	10767	HBS1 like translational GTPase	Y
HCK	NP_002101	3055	HCK proto-oncogene, Src family tyrosine kinase	Y
HCLS1	NP_005326	3059	hematopoietic cell-specific Lyn substrate 1	Y
HLA-G	NP_002118	3135	major histocompatibility complex, class I, G	Y
HMGB1	NP_002119	3146	high mobility group box 1	Y
HNRNPA1	NP_112420	3178	heterogeneous nuclear ribonucleoprotein A1	Y
HNRNPA2B1	NP_112533	3181	heterogeneous nuclear ribonucleoprotein A2/B1	Y
HNRNPA3	NP_919223	220988	heterogeneous nuclear ribonucleoprotein A3	Y
HNRNPF	NP_001091676	3185	heterogeneous nuclear ribonucleoprotein F	Y
HNRNPH1	NP_005511	3187	heterogeneous nuclear ribonucleoprotein H1	Y
HNRNPH3	NP_067676	3189	heterogeneous nuclear ribonucleoprotein H3	Y
HNRNPK	NP_002131	3190	heterogeneous nuclear ribonucleoprotein K	Y
HNRNPR	NP_001095869	10236	heterogeneous nuclear ribonucleoprotein R	Y
HNRNPU	NP_114032	3192	heterogeneous nuclear ribonucleoprotein U	Y
HNRNPUL1	NP_008971	11100	heterogeneous nuclear ribonucleoprotein U like 1	Y
HNRNPUL2	NP_001073027	221092	heterogeneous nuclear ribonucleoprotein U like 2	Y
HPSE	NP_001092010	10855	heparanase	Y
HS3ST3B1	NP_006032	9953	heparan sulfate-glucosamine 3-sulfotransferase 3B1	Y
HSBP1	NP_001528	3281	heat shock factor binding protein 1	Y
HSP90AB1	NP_031381	3326	heat shock protein 90 alpha family class B member 1	Y
HSP90B1	NP_003290	7184	heat shock protein 90 beta family member 1	Y
HSPA13	NP_008879	6782	heat shock protein family A (Hsp70) member 13	Y
HSPA4L	NP_055093	22824	heat shock protein family A (Hsp70) member 4 like	Y
HSPA5	NP_005338	3309	heat shock protein family A (Hsp70) member 5	Y
HSPA9	NP_004125	3313	heat shock protein family A (Hsp70) member 9	Y
HSPB1	NP_001531	3315	heat shock protein family B (small) member 1	Y
HSPE1	NP_002148	3336	heat shock protein family E (Hsp10) member 1	Y
HUWE1	NP_113584	10075	HECT, UBA and WWE domain containing E3 ubiquitin protein ligase 1	Y
ICOSLG	NP_056074	23308	inducible T cell costimulator ligand	Y
IDUA	NP_000194	3425	alpha-L-iduronidase	Y
IFI16	NP_005522	3428	interferon gamma inducible protein 16	Y
IFIT2	NP_001538	3433	interferon induced protein with tetratricopeptide repeats 2	Y
IGFBP2	NP_000588	3485	insulin like growth factor binding protein 2	Y
IGFBP4	NP_001543	3487	insulin like growth factor binding protein 4	Y
IGFBP5	NP_000590	3488	insulin like growth factor binding protein 5	Y
IGFBP7	NP_001544	3490	insulin like growth factor binding protein 7	Y
IGLL1	NP_064455	3543	immunoglobulin lambda like polypeptide 1	Y
IL16	NP_757366	3603	interleukin 16	Y
IMPDH2	NP_000875	3615	inosine monophosphate dehydrogenase 2	Y
INHBA	NP_002183	3624	inhibin subunit beta A	Y
INHBB	NP_002184	3625	inhibin subunit beta B	Y
INPP5D	NP_005532	3635	inositol polyphosphate-5-phosphatase D	Y
IQGAP2	NP_006624	10788	IQ motif containing GTPase activating protein 2	Y
ITGAM	NP_000623	3684	integrin subunit alpha M	Y
ITLN1	NP_060095	55600	intelectin 1	Y
ITM2C	NP_001012532	81618	integral membrane protein 2C	Y
JCHAIN	NP_653247	3512	joining chain of multimeric IgA and IgM	Y
JUP	NP_068831	3728	junction plakoglobin	Y
KARS1	NP_005539	3735	lysyl-tRNA synthetase 1	Y
KHSRP	NP_003676	8570	KH-type splicing regulatory protein	Y
KIAA0319L	NP_079150	79932	KIAA0319 like	Y
KLK1	NP_002248	3816	kallikrein 1	Y
KLK10	NP_001070968	5655	kallikrein related peptidase 10	Y
KLK12	NP_062544	43849	kallikrein related peptidase 12	Y
KLK13	NP_056411	26085	kallikrein related peptidase 13	Y
KLK7	NP_644806	5650	kallikrein related peptidase 7	Y
KLK9	NP_036447	284366	kallikrein related peptidase 9	Y
KNG1	NP_000884	3827	kininogen 1	Y
KRAS	NP_203524	3845	KRAS proto-oncogene, GTPase	Y
KRT13	NP_002265	3860	keratin 13	Y
KRT17	NP_000413	3872	keratin 17	Y
KRT18	NP_954657	3875	keratin 18	Y
KRT2	NP_000414	3849	keratin 2	Y
KRT8	NP_002264	3856	keratin 8	Y
LACRT	NP_150593	90070	lacritin	Y
LARP1	NP_291029	23367	La ribonucleoprotein 1, translational regulator	Y
LASP1	NP_006139	3927	LIM and SH3 protein 1	Y
LBP	NP_004130	3929	lipopolysaccharide binding protein	Y
LBR	NP_919424	3930	lamin B receptor	Y
LDHA	NP_005557	3939	lactate dehydrogenase A	Y
LFNG	NP_001035258	3955	LFNG O-fucosylpeptide 3-beta-N-acetylglucosaminyltransferase	Y
LILRA3	NP_006856	11026	leukocyte immunoglobulin like receptor A3	Y
LILRB2	NP_001074447	10288	leukocyte immunoglobulin like receptor B2	Y
LIMK2	NP_001026971	3985	LIM domain kinase 2	Y
LMAN1	NP_005561	3998	lectin, mannose binding 1	Y
LPO	NP_006142	4025	lactoperoxidase	Y
LRBA	NP_006717	987	LPS responsive beige-like anchor protein	Y
LRG1	NP_443204	116844	leucine rich alpha-2-glycoprotein 1	Y
LRPAP1	NP_002328	4043	LDL receptor related protein associated protein 1	Y
LRRC26	NP_001013675	389816	leucine rich repeat containing 26	Y
LRRC47	NP_065761	57470	leucine rich repeat containing 47	Y
LRRFIP1	NP_004726	9208	LRR binding FLII interacting protein 1	Y
LSP1	NP_001013273	4046	lymphocyte specific protein 1	Y
LSR	NP_057009	51599	lipolysis stimulated lipoprotein receptor	Y
LTA4H	NP_000886	4048	leukotriene A4 hydrolase	Y
LTBP2	NP_000419	4053	latent transforming growth factor beta binding protein 2	Y
LYPD2	NP_991108	137797	LY6/PLAUR domain containing 2	Y
LYPD3	NP_055215	27076	LY6/PLAUR domain containing 3	Y
MAMDC2	NP_694999	256691	MAM domain containing 2	Y
MAN1A1	NP_005898	4121	mannosidase alpha class 1A member 1	Y
MAN1A2	NP_006690	10905	mannosidase alpha class 1A member 2	Y
MAN1B1	NP_057303	11253	mannosidase alpha class 1B member 1	Y
MANBA	NP_005899	4126	mannosidase beta	Y
MANSC1	NP_060520	54682	MANSC domain containing 1	Y
MAP2K2	NP_109587	5605	mitogen-activated protein kinase kinase 2	Y
MAPRE1	NP_036457	22919	microtubule associated protein RP/EB family member 1	Y
MCFD2	NP_644808	90411	multiple coagulation factor deficiency 2, ER cargo receptor complex subunit	Y
MDH2	NP_005909	4191	malate dehydrogenase 2	Y
ME2	NP_002387	4200	malic enzyme 2	Y
MELTF	NP_005920	4241	melanotransferrin	Y
MGAM	NP_004659	8972	maltase-glucoamylase	Y
MGAT1	NP_001108092	4245	alpha-1,3-mannosyl-glycoprotein 2-beta-N-acetylglucosaminyltransferase	Y
MGAT2	NP_002399	4247	alpha-1,6-mannosyl-glycoprotein 2-beta-N-acetylglucosaminyltransferase	Y
MGAT4A	NP_036346	11320	alpha-1,3-mannosyl-glycoprotein 4-beta-N-acetylglucosaminyltransferase A	Y
MIA3	NP_940953	375056	MIA SH3 domain ER export factor 3	Y
MICAL1	NP_073602	64780	microtubule associated monooxygenase, calponin and LIM domain containing 1	Y
MLEC	NP_055545	9761	malectin	Y
MLKL	NP_689862	197259	mixed lineage kinase domain like pseudokinase	Y
MMP1	NP_002412	4312	matrix metallopeptidase 1	Y
MMP12	NP_002417	4321	matrix metallopeptidase 12	Y
MMP8	NP_002415	4317	matrix metallopeptidase 8	Y
MMP9	NP_004985	4318	matrix metallopeptidase 9	Y
MTMR3	NP_694691	8897	myotubularin related protein 3	Y
MUC1	NP_001018017	4582	mucin 1, cell surface associated	Y
MUC2	NP_002448	4583	mucin 2, oligomeric mucus/gel-forming	Y
MUC4	NP_060876	4585	mucin 4, cell surface associated	Y
MUC7	NP_689504	4589	mucin 7, secreted	Y
MUCL1	NP_477521	118430	mucin like 1	Y
MYH9	NP_002464	4627	myosin heavy chain 9	Y
NAAA	NP_055250	27163	N-acylethanolamine acid amidase	Y
NAXD	NP_060680	55739	NAD(P)HX dehydratase	Y
NDRG3	NP_114402	57446	NDRG family member 3	Y
NECTIN1	NP_976031	5818	nectin cell adhesion molecule 1	Y
NECTIN2	NP_001036189	5819	nectin cell adhesion molecule 2	Y
NECTIN4	NP_112178	81607	nectin cell adhesion molecule 4	Y
NEK9	NP_149107	91754	NIMA related kinase 9	Y
NOMO3	NP_001004067	408050	NODAL modulator 3	Y
NONO	NP_031389	4841	non-POU domain containing octamer binding	Y
NPEPPS	NP_006301	9520	aminopeptidase puromycin sensitive	Y
NPM1	NP_001032827	4869	nucleophosmin 1	Y
NPNT	NP_001028219	255743	nephronectin	Y
NRBP1	NP_037524	29959	nuclear receptor binding protein 1	Y
NUCB1	NP_006175	4924	nucleobindin 1	Y
NUCB2	NP_005004	4925	nucleobindin 2	Y
OGA	NP_036347	10724	O-GlcNAcase	Y
OLFM4	NP_006409	10562	olfactomedin 4	Y
OS9	NP_001017956	10956	OS9 endoplasmic reticulum lectin	Y
PABPC1	NP_002559	26986	poly(A) binding protein cytoplasmic 1	Y
PAK2	NP_002568	5062	p21 (RAC1) activated kinase 2	Y
PARP4	NP_006428	143	poly(ADP-ribose) polymerase family member 4	Y
PAXX	NP_899064	286257	PAXX non-homologous end joining factor	Y
PCBP1	NP_006187	5093	poly(rC) binding protein 1	Y
PCMT1	NP_005380	5110	protein-L-isoaspartate (D-aspartate) O-methyltransferase	Y
PCNP	NP_065090	57092	PEST proteolytic signal containing nuclear protein	Y
PCOLCE	NP_002584	5118	procollagen C-endopeptidase enhancer	Y
PCSK1N	NP_037403	27344	proprotein convertase subtilisin/kexin type 1 inhibitor	Y
PCSK5	NP_006191	5125	proprotein convertase subtilisin/kexin type 5	Y
PDGFA	NP_002598	5154	platelet derived growth factor subunit A	Y
PDGFC	NP_057289	56034	platelet derived growth factor C	Y
PDGFD	NP_149126	80310	platelet derived growth factor D	Y
PDIA3	NP_005304	2923	protein disulfide isomerase family A member 3	Y
PDLIM5	NP_001011516	10611	PDZ and LIM domain 5	Y
PEBP4	NP_659399	157310	phosphatidylethanolamine binding protein 4	Y
PFKL	NP_001002021	5211	phosphofructokinase, liver type	Y
PFKP	NP_002618	5214	phosphofructokinase, platelet	Y
PGK1	NP_000282	5230	phosphoglycerate kinase 1	Y
PGLS	NP_036220	25796	6-phosphogluconolactonase	Y
PGLYRP1	NP_005082	8993	peptidoglycan recognition protein 1	Y
PGLYRP2	NP_443122	114770	peptidoglycan recognition protein 2	Y
PIK3CD	NP_005017	5293	phosphatidylinositol-4,5-bisphosphate 3-kinase catalytic subunit delta	Y
PIK3IP1	NP_443112	113791	phosphoinositide-3-kinase interacting protein 1	Y
PIP	NP_002643	5304	prolactin induced protein	Y
PKM	NP_002645	5315	pyruvate kinase M1/2	Y
PLBD1	NP_079105	79887	phospholipase B domain containing 1	Y
PLCD1	NP_006216	5333	phospholipase C delta 1	Y
PLEC	NP_000436	5339	plectin	Y
PLEKHO2	NP_079477	80301	pleckstrin homology domain containing O2	Y
PLIN3	NP_005808	10226	perilipin 3	Y
PLOD1	NP_000293	5351	procollagen-lysine,2-oxoglutarate 5-dioxygenase 1	Y
PLOD2	NP_891988	5352	procollagen-lysine,2-oxoglutarate 5-dioxygenase 2	Y
PODXL	NP_001018121	5420	podocalyxin like	Y
PODXL2	NP_056535	50512	podocalyxin like 2	Y
PPM1A	NP_066283	5494	protein phosphatase, Mg2+/Mn2+ dependent 1A	Y
PPP6R3	NP_060782	55291	protein phosphatase 6 regulatory subunit 3	Y
PRADC1	NP_115695	84279	protease associated domain containing 1	Y
PRB3	NP_006240	5544	proline rich protein BstNI subfamily 3	Y
PRDX2	NP_005800	7001	peroxiredoxin 2	Y
PRKCSH	NP_001001329	5589	protein kinase C substrate 80K-H	Y
PROM1	NP_006008	8842	prominin 1	Y
PROZ	NP_003882	8858	protein Z, vitamin K dependent plasma glycoprotein	Y
PRSS27	NP_114154	83886	serine protease 27	Y
PRSS8	NP_002764	5652	serine protease 8	Y
PSMA1	NP_683877	5682	proteasome 20S subunit alpha 1	Y
PSMA6	NP_002782	5687	proteasome 20S subunit alpha 6	Y
PSMA7	NP_002783	5688	proteasome 20S subunit alpha 7	Y
PSMB1	NP_002784	5689	proteasome 20S subunit beta 1	Y
PSMD14	NP_005796	10213	proteasome 26S subunit, non-ATPase 14	Y
PTBP1	NP_002810	5725	polypyrimidine tract binding protein 1	Y
PTPA	NP_821070	5524	protein phosphatase 2 phosphatase activator	Y
PTPN6	NP_536858	5777	protein tyrosine phosphatase non-receptor type 6	Y
PTPN7	NP_542155	5778	protein tyrosine phosphatase non-receptor type 7	Y
PTPRE	NP_569119	5791	protein tyrosine phosphatase receptor type E	Y
PTX3	NP_002843	5806	pentraxin 3	Y
PXN	NP_002850	5829	paxillin	Y
QSOX1	NP_001004128	5768	quiescin sulfhydryl oxidase 1	Y
RAB2A	NP_002856	5862	RAB2A, member RAS oncogene family	Y
RAB33B	NP_112586	83452	RAB33B, member RAS oncogene family	Y
RAB8B	NP_057614	51762	RAB8B, member RAS oncogene family	Y
RAC2	NP_002863	5880	Rac family small GTPase 2	Y
RAD23B	NP_002865	5887	RAD23 homolog B, nucleotide excision repair protein	Y
RALA	NP_005393	5898	RAS like proto-oncogene A	Y
RALGAPA1	NP_919277	253959	Ral GTPase activating protein catalytic subunit alpha 1	Y
RAPH1	NP_998754	65059	Ras association (RalGDS/AF-6) and pleckstrin homology domains 1	Y
RBBP4	NP_005601	5928	RB binding protein 4, chromatin remodeling factor	Y
RCN1	NP_002892	5954	reticulocalbin 1	Y
REL	NP_002899	5966	REL proto-oncogene, NF-kB subunit	Y
REPS2	NP_004717	9185	RALBP1 associated Eps domain containing 2	Y
RHOA	NP_001655	387	ras homolog family member A	Y
RHOG	NP_001656	391	ras homolog family member G	Y
RIPOR2	NP_055537	9750	RHO family interacting cell polarization regulator 2	Y
RNASE1	NP_937878	6035	ribonuclease A family member 1, pancreatic	Y
RNASE3	NP_002926	6037	ribonuclease A family member 3	Y
RNASE7	NP_115961	84659	ribonuclease A family member 7	Y
RNPEP	NP_064601	6051	arginyl aminopeptidase	Y
RO60	NP_001035828	6738	Ro60, Y RNA binding protein	Y
RPA1	NP_002936	6117	replication protein A1	Y
RPS6KA1	NP_001006666	6195	ribosomal protein S6 kinase A1	Y
RPS6KA3	NP_004577	6197	ribosomal protein S6 kinase A3	Y
SARS1	NP_006504	6301	seryl-tRNA synthetase 1	Y
SCFD1	NP_057190	23256	sec1 family domain containing 1	Y
SCGB2A1	NP_002398	4246	secretoglobin family 2A member 1	Y
SCPEP1	NP_067639	59342	serine carboxypeptidase 1	Y
SDC4	NP_002990	6385	syndecan 4	Y
SDF4	NP_057260	51150	stromal cell derived factor 4	Y
SEC22B	NP_004883	9554	SEC22 homolog B, vesicle trafficking protein	Y
SEC23A	NP_006355	10484	SEC23 homolog A, COPII coat complex component	Y
SEC24C	NP_940999	9632	SEC24 homolog C, COPII coat complex component	Y
SEC31A	NP_001070676	22872	SEC31 homolog A, COPII coat complex component	Y
SELENOP	NP_001087195	6414	selenoprotein P	Y
SEMA3D	NP_689967	223117	semaphorin 3D	Y
SEMA3F	NP_004177	6405	semaphorin 3F	Y
SEPTIN9	NP_001106966	10801	septin 9	Y
SERPINB2	NP_002566	5055	serpin family B member 2	Y
SERPINB3	NP_008850	6317	serpin family B member 3	Y
SERPINB5	NP_002630	5268	serpin family B member 5	Y
SERPINE2	NP_006207	5270	serpin family E member 2	Y
SFRP1	NP_003003	6422	secreted frizzled related protein 1	Y
SFTPD	NP_003010	6441	surfactant protein D	Y
SH3BP1	NP_061830	23616	SH3 domain binding protein 1	Y
SH3KBP1	NP_001019837	30011	SH3 domain containing kinase binding protein 1	Y
SIAE	NP_733746	54414	sialic acid acetylesterase	Y
SIDT2	NP_001035545	51092	SID1 transmembrane family member 2	Y
SIRPA	NP_001035112	140885	signal regulatory protein alpha	Y
SLC37A2	NP_938018	219855	solute carrier family 37 member 2	Y
SLC38A10	NP_001033073	124565	solute carrier family 38 member 10	Y
SLC44A4	NP_079533	80736	solute carrier family 44 member 4	Y
SLITRK5	NP_056382	26050	SLIT and NTRK like family member 5	Y
SMAP2	NP_073570	64744	small ArfGAP2	Y
SMC3	NP_005436	9126	structural maintenance of chromosomes 3	Y
SMOC1	NP_001030024	64093	SPARC related modular calcium binding 1	Y
SMPD1	NP_001007594	6609	sphingomyelin phosphodiesterase 1	Y
SMPDL3B	NP_001009568	27293	sphingomyelin phosphodiesterase acid like 3B	Y
SNAP29	NP_004773	9342	synaptosome associated protein 29	Y
SNCG	NP_003078	6623	synuclein gamma	Y
SND1	NP_055205	27044	staphylococcal nuclease and tudor domain containing 1	Y
SOD1	NP_000445	6647	superoxide dismutase 1	Y
SPCS3	NP_068747	60559	signal peptidase complex subunit 3	Y
SPRING1	NP_079014	79794	SREBF pathway regulator in golgi 1	Y
SPTBN1	NP_003119	6711	spectrin beta, non-erythrocytic 1	Y
ST3GAL1	NP_775479	6482	ST3 beta-galactoside alpha-2,3-sialyltransferase 1	Y
ST3GAL4	NP_006269	6484	ST3 beta-galactoside alpha-2,3-sialyltransferase 4	Y
ST3GAL6	NP_006091	10402	ST3 beta-galactoside alpha-2,3-sialyltransferase 6	Y
ST6GAL1	NP_775323	6480	ST6 beta-galactoside alpha-2,6-sialyltransferase 1	Y
ST6GALNAC6	NP_038471	30815	ST6 N-acetylgalactosaminide alpha-2,6-sialyltransferase 6	Y
STC1	NP_003146	6781	stanniocalcin 1	Y
STIP1	NP_006810	10963	stress induced phosphoprotein 1	Y
SULT1B1	NP_055280	27284	sulfotransferase family 1B member 1	Y
SUMF2	NP_001035934	25870	sulfatase modifying factor 2	Y
SYNE1	NP_892006	23345	spectrin repeat containing nuclear envelope protein 1	Y
TGFBR3	NP_003234	7049	transforming growth factor beta receptor 3	Y
THSD4	NP_079093	79875	thrombospondin type 1 domain containing 4	Y
THUMPD1	NP_060206	55623	THUMP domain containing 1	Y
THYN1	NP_954995	29087	thymocyte nuclear protein 1	Y
TINAGL1	NP_071447	64129	tubulointerstitial nephritis antigen like 1	Y
TLN2	NP_055874	83660	talin 2	Y
TMED10	NP_006818	10972	transmembrane p24 trafficking protein 10	Y
TMEM132A	NP_060340	54972	transmembrane protein 132A	Y
TMEM30A	NP_060717	55754	transmembrane protein 30A	Y
TMPRSS11A	NP_001107859	339967	transmembrane serine protease 11A	Y
TMPRSS11B	NP_872308	132724	transmembrane serine protease 11B	Y
TMPRSS11D	NP_004253	9407	transmembrane serine protease 11D	Y
TMPRSS11E	NP_054777	28983	transmembrane serine protease 11E	Y
TNFSF13B	NP_006564	10673	TNF superfamily member 13b	Y
TOR1A	NP_000104	1861	torsin family 1 member A	Y
TOR1AIP1	NP_056417	26092	torsin 1A interacting protein 1	Y
TPD52L2	NP_955394	7165	TPD52 like 2	Y
TPP1	NP_000382	1200	tripeptidyl peptidase 1	Y
TPPP3	NP_057048	51673	tubulin polymerization promoting protein family member 3	Y
TRIM29	NP_036233	23650	tripartite motif containing 29	Y
TSC22D2	NP_055594	9819	TSC22 domain family member 2	Y
TSN	NP_004613	7247	translin	Y
TTC1	NP_003305	7265	tetratricopeptide repeat domain 1	Y
TTC17	NP_060729	55761	tetratricopeptide repeat domain 17	Y
TUBA1B	NP_006073	10376	tubulin alpha 1b	Y
TUBA4A	NP_005991	7277	tubulin alpha 4a	Y
TUBB4B	NP_006079	10383	tubulin beta 4B class IVb	Y
TUFM	NP_003312	7284	Tu translation elongation factor, mitochondrial	Y
TWF2	NP_009215	11344	twinfilin actin binding protein 2	Y
TXNDC12	NP_056997	51060	thioredoxin domain containing 12	Y
TXNDC5	NP_110437	81567	thioredoxin domain containing 5	Y
UBA1	NP_695012	7317	ubiquitin like modifier activating enzyme 1	Y
UBA6	NP_060697	55236	ubiquitin like modifier activating enzyme 6	Y
UBASH3B	NP_116262	84959	ubiquitin associated and SH3 domain containing B	Y
UGDH	NP_003350	7358	UDP-glucose 6-dehydrogenase	Y
UNC13D	NP_954712	201294	unc-13 homolog D	Y
UNC5C	NP_003719	8633	unc-5 netrin receptor C	Y
UPF1	NP_002902	5976	UPF1 RNA helicase and ATPase	Y
USP14	NP_001032411	9097	ubiquitin specific peptidase 14	Y
VAPB	NP_004729	9217	VAMP associated protein B and C	Y
VCPIP1	NP_079330	80124	valosin containing protein interacting protein 1	Y
VEGFC	NP_005420	7424	vascular endothelial growth factor C	Y
VIM	NP_003371	7431	vimentin	Y
VSIG2	NP_055127	23584	V-set and immunoglobulin domain containing 2	Y
VTA1	NP_057569	51534	vesicle trafficking 1	Y
VWA1	NP_073745	64856	von Willebrand factor A domain containing 1	Y
WDR37	NP_054742	22884	WD repeat domain 37	Y
XPNPEP1	NP_065116	7511	X-prolyl aminopeptidase 1	Y
XRCC6	NP_001460	2547	X-ray repair cross complementing 6	Y
XYLT2	NP_071450	64132	xylosyltransferase 2	Y
YBX1	NP_004550	4904	Y-box binding protein 1	Y
ZG16B	NP_660295	124220	zymogen granule protein 16B	Y
ZYX	NP_001010972	7791	zyxin	Y
ALDH3A1	NP_000682	218	aldehyde dehydrogenase 3 family member A1	Y
ALDH9A1	NP_000687	223	aldehyde dehydrogenase 9 family member A1	Y
ALDOA	NP_908932	226	aldolase, fructose-bisphosphate A	Y
ALDOC	NP_005156	230	aldolase, fructose-bisphosphate C	Y
APPL1	NP_036228	26060	adaptor protein, phosphotyrosine interacting with PH domain and leucine zipper 1	Y
ARHGEF1	NP_945353	9138	Rho guanine nucleotide exchange factor 1	Y
ATG7	NP_006386	10533	autophagy related 7	Y
CBFB	NP_074036	865	core-binding factor subunit beta	Y
CCN1	NP_001545	3491	cellular communication network factor 1	Y
CDC37	NP_008996	11140	cell division cycle 37, HSP90 cochaperone	Y
CHMP4C	NP_689497	92421	charged multivesicular body protein 4C	Y
CSTA	NP_005204	1475	cystatin A	Y
DPP3	NP_569710	10072	dipeptidyl peptidase 3	Y
ENO3	NP_001967	2027	enolase 3	Y
FAM114A1	NP_612398	92689	family with sequence similarity 114 member A1	Y
FKBP4	NP_002005	2288	FKBP prolyl isomerase 4	Y
FKBP5	NP_004108	2289	FKBP prolyl isomerase 5	Y
FLG2	NP_001014364	388698	filaggrin 2	Y
FSCN1	NP_003079	6624	fascin actin-bundling protein 1	Y
GARS1	NP_002038	2617	glycyl-tRNA synthetase 1	Y
H1-5	NP_005313	3009	H1.5 linker histone, cluster member	Y
HARS1	NP_002100	3035	histidyl-tRNA synthetase 1	Y
HIBCH	NP_055177	26275	3-hydroxyisobutyryl-CoA hydrolase	Y
HNRNPC	NP_001070911	3183	heterogeneous nuclear ribonucleoprotein C	Y
HPRT1	NP_000185	3251	hypoxanthine phosphoribosyltransferase 1	Y
HSPB8	NP_055180	26353	heat shock protein family B (small) member 8	Y
KCNB1	NP_004966	3745	potassium voltage-gated channel subfamily B member 1	Y
KPNB1	NP_002256	3837	karyopherin subunit beta 1	Y
LGALS3	NP_002297	3958	galectin 3	Y
METRN	NP_076947	79006	meteorin, glial cell differentiation regulator	Y
MSN	NP_002435	4478	moesin	Y
NT5C3A	NP_057573	51251	5'-nucleotidase, cytosolic IIIA	Y
OLA1	NP_001011708	29789	Obg like ATPase 1	Y
OXR1	NP_851999	55074	oxidation resistance 1	Y
PLA2G2A	NP_000291	5320	phospholipase A2 group IIA	Y
PLS3	NP_005023	5358	plastin 3	Y
PMM2	NP_000294	5373	phosphomannomutase 2	Y
PPA1	NP_066952	5464	inorganic pyrophosphatase 1	Y
PPP1CA	NP_001008709	5499	protein phosphatase 1 catalytic subunit alpha	Y
PPP1R9B	NP_115984	84687	protein phosphatase 1 regulatory subunit 9B	Y
PRKACA	NP_997401	5566	protein kinase cAMP-activated catalytic subunit alpha	Y
RAP1A	NP_001010935	5906	RAP1A, member of RAS oncogene family	Y
RBM8A	NP_005096	9939	RNA binding motif protein 8A	Y
S100A7	NP_002954	6278	S100 calcium binding protein A7	Y
S100A8	NP_002955	6279	S100 calcium binding protein A8	Y
S100A9	NP_002956	6280	S100 calcium binding protein A9	Y
SERPINB4	NP_002965	6318	serpin family B member 4	Y
SERPINB9	NP_004146	5272	serpin family B member 9	Y
SFN	NP_006133	2810	stratifin	Y
SGTA	NP_003012	6449	small glutamine rich tetratricopeptide repeat co-chaperone alpha	Y
SMC1A	NP_006297	8243	structural maintenance of chromosomes 1A	Y
SMS	NP_004586	6611	spermine synthase	Y
SNX27	NP_112180	81609	sorting nexin 27	Y
SPTAN1	NP_003118	6709	spectrin alpha, non-erythrocytic 1	Y
SRSF1	NP_001071634	6426	serine and arginine rich splicing factor 1	Y
SZT2	NP_056099	23334	SZT2 subunit of KICSTOR complex	Y
TAF15	NP_631961	8148	TATA-box binding protein associated factor 15	Y
TPM2	NP_998839	7169	tropomyosin 2	Y
TPM3	NP_001036816	7170	tropomyosin 3	Y
UCHL3	NP_005993	7347	ubiquitin C-terminal hydrolase L3	Y
YWHAH	NP_003396	7533	tyrosine 3-monooxygenase/tryptophan 5-monooxygenase activation protein eta	Y
YWHAQ	NP_006817	10971	tyrosine 3-monooxygenase/tryptophan 5-monooxygenase activation protein theta	Y
ANKRD44	NP_710181	91526	ankyrin repeat domain 44	Y
ANP32E	NP_112182	81611	acidic nuclear phosphoprotein 32 family member E	Y
ANXA1	NP_000691	301	annexin A1	Y
ANXA11	NP_665876	311	annexin A11	Y
ANXA4	NP_001144	307	annexin A4	Y
DNAJC9	NP_056005	23234	DnaJ heat shock protein family (Hsp40) member C9	Y
RAB8A	NP_005361	4218	RAB8A, member RAS oncogene family	Y
TSG101	NP_006283	7251	tumor susceptibility 101	Y
AP1G1	NP_001025178	164	adaptor related protein complex 1 subunit gamma 1	Y
AP2A1	NP_570603	160	adaptor related protein complex 2 subunit alpha 1	Y
APOA4	NP_000473	337	apolipoprotein A4	Y
GMFB	NP_004115	2764	glia maturation factor beta	Y
HNRNPAB	NP_004490	3182	heterogeneous nuclear ribonucleoprotein A/B	Y
LZIC	NP_115744	84328	leucine zipper and CTNNBIP1 domain containing	Y
NAXE	NP_658985	128240	NAD(P)HX epimerase	Y
NT5DC1	NP_689942	221294	5'-nucleotidase domain containing 1	Y
OSBPL9	NP_683704	114883	oxysterol binding protein like 9	Y
P4HB	NP_000909	5034	prolyl 4-hydroxylase subunit beta	Y
PPP1R14B	NP_619634	26472	protein phosphatase 1 regulatory inhibitor subunit 14B	Y
SPATS2L	NP_001093894	26010	spermatogenesis associated serine rich 2 like	Y
SYNCRIP	NP_006363	10492	synaptotagmin binding cytoplasmic RNA interacting protein	Y
AP2A2	NP_036437	161	adaptor related protein complex 2 subunit alpha 2	Y
APEH	NP_001631	327	acylaminoacyl-peptide hydrolase	Y
APIP	NP_057041	51074	APAF1 interacting protein	Y
APOC1	NP_001636	341	apolipoprotein C1	Y
ARG1	NP_000036	383	arginase 1	Y
ARPC1A	NP_006400	10552	actin related protein 2/3 complex subunit 1A	Y
ARPC4	NP_005709	10093	actin related protein 2/3 complex subunit 4	Y
ARRB2	NP_945355	409	arrestin beta 2	Y
ASMTL	NP_004183	8623	acetylserotonin O-methyltransferase like	Y
ATP2A3	NP_777618	489	ATPase sarcoplasmic/endoplasmic reticulum Ca2+ transporting 3	Y
CALM1	NP_008819	801	calmodulin 1	Y
CALML5	NP_059118	51806	calmodulin like 5	Y
CAPN2	NP_001739	824	calpain 2	Y
CBR1	NP_001748	873	carbonyl reductase 1	Y
CCT2	NP_006422	10576	chaperonin containing TCP1 subunit 2	Y
CCT3	NP_005989	7203	chaperonin containing TCP1 subunit 3	Y
CCT7	NP_001009570	10574	chaperonin containing TCP1 subunit 7	Y
CD2AP	NP_036252	23607	CD2 associated protein	Y
CHD6	NP_115597	84181	chromodomain helicase DNA binding protein 6	Y
CHMP4A	NP_054888	29082	charged multivesicular body protein 4A	Y
CHORDC1	NP_036256	26973	cysteine and histidine rich domain containing 1	Y
CKB	NP_001814	1152	creatine kinase B	Y
CKM	NP_001815	1158	creatine kinase, M-type	Y
CLIC1	NP_001279	1192	chloride intracellular channel 1	Y
CLIC6	NP_444507	54102	chloride intracellular channel 6	Y
CMPK1	NP_057392	51727	cytidine/uridine monophosphate kinase 1	Y
CNN2	NP_004359	1265	calponin 2	Y
COPE	NP_955476	11316	COPI coat complex subunit epsilon	Y
COPS6	NP_006824	10980	COP9 signalosome subunit 6	Y
CORO1B	NP_001018080	57175	coronin 1B	Y
CRISPLD1	NP_113649	83690	cysteine rich secretory protein LCCL domain containing 1	Y
CRK	NP_058431	1398	CRK proto-oncogene, adaptor protein	Y
CRNN	NP_057274	49860	cornulin	Y
CS	NP_004068	1431	citrate synthase	Y
CSDE1	NP_009089	7812	cold shock domain containing E1	Y
CUL2	NP_003582	8453	cullin 2	Y
CYB5R1	NP_057327	51706	cytochrome b5 reductase 1	Y
CYB5R2	NP_057313	51700	cytochrome b5 reductase 2	Y
CYTH1	NP_004753	9267	cytohesin 1	Y
DBNL	NP_001014436	28988	drebrin like	Y
DCTN2	NP_006391	10540	dynactin subunit 2	Y
DCXR	NP_057370	51181	dicarbonyl and L-xylulose reductase	Y
DECR1	NP_001350	1666	2,4-dienoyl-CoA reductase 1	Y
DERA	NP_057038	51071	deoxyribose-phosphate aldolase	Y
DNAH5	NP_001360	1767	dynein axonemal heavy chain 5	Y
DNMT1	NP_001370	1786	DNA methyltransferase 1	Y
DPP9	NP_631898	91039	dipeptidyl peptidase 9	Y
DSP	NP_001008844	1832	desmoplakin	Y
DUSP3	NP_004081	1845	dual specificity phosphatase 3	Y
ECHS1	NP_004083	1892	enoyl-CoA hydratase, short chain 1	Y
EEF1D	NP_115754	1936	eukaryotic translation elongation factor 1 delta	Y
EFHD2	NP_077305	79180	EF-hand domain family member D2	Y
EIF4A2	NP_001958	1974	eukaryotic translation initiation factor 4A2	Y
EIF5	NP_892116	1983	eukaryotic translation initiation factor 5	Y
EIF6	NP_852131	3692	eukaryotic translation initiation factor 6	Y
ELMO1	NP_055615	9844	engulfment and cell motility 1	Y
ERP29	NP_001029197	10961	endoplasmic reticulum protein 29	Y
ETFA	NP_001121188	2108	electron transfer flavoprotein subunit alpha	Y
ETFB	NP_001014763	2109	electron transfer flavoprotein subunit beta	Y
EZR	NP_001104547	7430	ezrin	Y
FAH	NP_000128	2184	fumarylacetoacetate hydrolase	Y
FAM107B	NP_113641	83641	family with sequence similarity 107 member B	Y
FBP1	NP_001121100	2203	fructose-bisphosphatase 1	Y
FBXO6	NP_060908	26270	F-box protein 6	Y
FLG	NP_002007	2312	filaggrin	Y
FTH1	NP_002023	2495	ferritin heavy chain 1	Y
GBP5	NP_443174	115362	guanylate binding protein 5	Y
GCC2	NP_852118	9648	GRIP and coiled-coil domain containing 2	Y
GCLM	NP_002052	2730	glutamate-cysteine ligase modifier subunit	Y
GCSH	NP_004474	2653	glycine cleavage system protein H	Y
GLTP	NP_057517	51228	glycolipid transfer protein	Y
GLUD1	NP_005262	2746	glutamate dehydrogenase 1	Y
GLUL	NP_001028216	2752	glutamate-ammonia ligase	Y
GOT1	NP_002070	2805	glutamic-oxaloacetic transaminase 1	Y
GOT2	NP_002071	2806	glutamic-oxaloacetic transaminase 2	Y
GPD1L	NP_055956	23171	glycerol-3-phosphate dehydrogenase 1 like	Y
GPX4	NP_001034937	2879	glutathione peroxidase 4	Y
GRHPR	NP_036335	9380	glyoxylate and hydroxypyruvate reductase	Y
HDAC2	NP_001518	3066	histone deacetylase 2	Y
HDGF	NP_001119523	3068	heparin binding growth factor	Y
HINT3	NP_612638	135114	histidine triad nucleotide binding protein 3	Y
HK1	NP_000179	3098	hexokinase 1	Y
HNMT	NP_008826	3176	histamine N-methyltransferase	Y
HNRNPD	NP_001003810	3184	heterogeneous nuclear ribonucleoprotein D	Y
HNRNPL	NP_001005335	3191	heterogeneous nuclear ribonucleoprotein L	Y
HOOK3	NP_115786	84376	hook microtubule tethering protein 3	Y
IARS2	NP_060530	55699	isoleucyl-tRNA synthetase 2, mitochondrial	Y
IDH2	NP_002159	3418	isocitrate dehydrogenase (NADP(+)) 2	Y
ILF2	NP_004506	3608	interleukin enhancer binding factor 2	Y
ILF3	NP_703194	3609	interleukin enhancer binding factor 3	Y
IMPDH1	NP_001096075	3614	inosine monophosphate dehydrogenase 1	Y
INPP5B	NP_005531	3633	inositol polyphosphate-5-phosphatase B	Y
IPO5	NP_002262	3843	importin 5	Y
IQSEC1	NP_055684	9922	IQ motif and Sec7 domain ArfGEF 1	Y
IRAK4	NP_001107654	51135	interleukin 1 receptor associated kinase 4	Y
KRT19	NP_002267	3880	keratin 19	Y
KRT3	NP_476429	3850	keratin 3	Y
KRT33A	NP_004129	3883	keratin 33A	Y
KRT5	NP_000415	3852	keratin 5	Y
KRT7	NP_005547	3855	keratin 7	Y
KRT75	NP_004684	9119	keratin 75	Y
KRT77	NP_778253	374454	keratin 77	Y
LAP3	NP_056991	51056	leucine aminopeptidase 3	Y
LGALS1	NP_002296	3956	galectin 1	Y
MAP1S	NP_060644	55201	microtubule associated protein 1S	Y
MARCKS	NP_002347	4082	myristoylated alanine rich protein kinase C substrate	Y
MAT2A	NP_005902	4144	methionine adenosyltransferase 2A	Y
METAP1	NP_055958	23173	methionyl aminopeptidase 1	Y
MTHFD1	NP_005947	4522	methylenetetrahydrofolate dehydrogenase, cyclohydrolase and formyltetrahydrofolate synthetase 1	Y
MYL12B	NP_291024	103910	myosin light chain 12B	Y
MYL6	NP_524147	4637	myosin light chain 6	Y
NACA	NP_001106674	4666	nascent polypeptide associated complex subunit alpha	Y
NAE1	NP_001018170	8883	NEDD8 activating enzyme E1 subunit 1	Y
NAPA	NP_003818	8775	NSF attachment protein alpha	Y
NBEAL2	NP_055990	23218	neurobeachin like 2	Y
NIT1	NP_005591	4817	nitrilase 1	Y
NUDC	NP_006591	10726	nuclear distribution C, dynein complex regulator	Y
NUDT3	NP_006694	11165	nudix hydrolase 3	Y
OAF	NP_848602	220323	out at first homolog	Y
OSBP	NP_002547	5007	oxysterol binding protein	Y
OXSR1	NP_005100	9943	oxidative stress responsive kinase 1	Y
PAFAH1B1	NP_000421	5048	platelet activating factor acetylhydrolase 1b regulatory subunit 1	Y
PARK7	NP_001116849	11315	Parkinsonism associated deglycase	Y
PCBP2	NP_001092090	5094	poly(rC) binding protein 2	Y
PDXK	NP_003672	8566	pyridoxal kinase	Y
PEA15	NP_003759	8682	proliferation and apoptosis adaptor protein 15	Y
PFDN1	NP_002613	5201	prefoldin subunit 1	Y
PGD	NP_002622	5226	phosphogluconate dehydrogenase	Y
PGM2L1	NP_775853	283209	phosphoglucomutase 2 like 1	Y
PGM3	NP_056414	5238	phosphoglucomutase 3	Y
PIK3CB	NP_006210	5291	phosphatidylinositol-4,5-bisphosphate 3-kinase catalytic subunit beta	Y
PIP4K2A	NP_005019	5305	phosphatidylinositol-5-phosphate 4-kinase type 2 alpha	Y
PLAA	NP_001026859	9373	phospholipase A2 activating protein	Y
PLEK	NP_002655	5341	pleckstrin	Y
PMPCA	NP_055975	23203	peptidase, mitochondrial processing subunit alpha	Y
PPID	NP_005029	5481	peptidylprolyl isomerase D	Y
PPIL1	NP_057143	51645	peptidylprolyl isomerase like 1	Y
PPIP5K1	NP_055474	9677	diphosphoinositol pentakisphosphate kinase 1	Y
PPM1B	NP_001028729	5495	protein phosphatase, Mg2+/Mn2+ dependent 1B	Y
PPM1F	NP_055449	9647	protein phosphatase, Mg2+/Mn2+ dependent 1F	Y
PPP3CB	NP_066955	5532	protein phosphatase 3 catalytic subunit beta	Y
PPP6R1	NP_055746	22870	protein phosphatase 6 regulatory subunit 1	Y
PRDX6	NP_004896	9588	peroxiredoxin 6	Y
PRKAR2A	NP_004148	5576	protein kinase cAMP-dependent type II regulatory subunit alpha	Y
PRPSAP1	NP_002757	5635	phosphoribosyl pyrophosphate synthetase associated protein 1	Y
PSMA3	NP_687033	5684	proteasome 20S subunit alpha 3	Y
PSMA4	NP_001096138	5685	proteasome 20S subunit alpha 4	Y
PSMB2	NP_002785	5690	proteasome 20S subunit beta 2	Y
PSMB8	NP_683720	5696	proteasome 20S subunit beta 8	Y
PSMC1	NP_002793	5700	proteasome 26S subunit, ATPase 1	Y
PSMC5	NP_002796	5705	proteasome 26S subunit, ATPase 5	Y
PSMD3	NP_002800	5709	proteasome 26S subunit, non-ATPase 3	Y
PSTPIP2	NP_077748	9050	proline-serine-threonine phosphatase interacting protein 2	Y
PYCARD	NP_660183	29108	PYD and CARD domain containing	Y
PYGB	NP_002853	5834	glycogen phosphorylase B	Y
RAB13	NP_002861	5872	RAB13, member RAS oncogene family	Y
RAB14	NP_057406	51552	RAB14, member RAS oncogene family	Y
RAB1B	NP_112243	81876	RAB1B, member RAS oncogene family	Y
RAB21	NP_055814	23011	RAB21, member RAS oncogene family	Y
RAB2B	NP_116235	84932	RAB2B, member RAS oncogene family	Y
RAB38	NP_071732	23682	RAB38, member RAS oncogene family	Y
RAB3D	NP_004274	9545	RAB3D, member RAS oncogene family	Y
RAB9B	NP_057454	51209	RAB9B, member RAS oncogene family	Y
RANBP3	NP_015561	8498	RAN binding protein 3	Y
RAP1GDS1	NP_001093899	5910	Rap1 GTPase-GDP dissociation stimulator 1	Y
RARRES1	NP_996846	5918	retinoic acid receptor responder 1	Y
RCSD1	NP_443094	92241	RCSD domain containing 1	Y
RNASEH2B	NP_078846	79621	ribonuclease H2 subunit B	Y
RPL13	NP_000968	6137	ribosomal protein L13	Y
RPL23A	NP_000975	6147	ribosomal protein L23a	Y
RPLP0	NP_444505	6175	ribosomal protein lateral stalk subunit P0	Y
RPS14	NP_001020242	6208	ribosomal protein S14	Y
RPS7	NP_001002	6201	ribosomal protein S7	Y
RRBP1	NP_001036041	6238	ribosome binding protein 1	Y
RSU1	NP_036557	6251	Ras suppressor protein 1	Y
RTCB	NP_055121	51493	RNA 2',3'-cyclic phosphate and 5'-OH ligase	Y
RXRG	NP_008848	6258	retinoid X receptor gamma	Y
S100A11	NP_005611	6282	S100 calcium binding protein A11	Y
SERBP1	NP_056455	26135	SERPINE1 mRNA binding protein 1	Y
SERPINB13	NP_036529	5275	serpin family B member 13	Y
SERPINB6	NP_004559	5269	serpin family B member 6	Y
SET	NP_001116293	6418	SET nuclear proto-oncogene	Y
SFPQ	NP_005057	6421	splicing factor proline and glutamine rich	Y
SNRNP70	NP_003080	6625	small nuclear ribonucleoprotein U1 subunit 70	Y
SNX1	NP_003090	6642	sorting nexin 1	Y
SORD	NP_003095	6652	sorbitol dehydrogenase	Y
SPAG9	NP_003962	9043	sperm associated antigen 9	Y
SPECC1	NP_001028727	92521	sperm antigen with calponin homology and coiled-coil domains 1	Y
SPINK5	NP_001121170	11005	serine peptidase inhibitor Kazal type 5	Y
SRSF3	NP_003008	6428	serine and arginine rich splicing factor 3	Y
STAU1	NP_001032405	6780	staufen double-stranded RNA binding protein 1	Y
STK38L	NP_055815	23012	serine/threonine kinase 38 like	Y
SYK	NP_003168	6850	spleen associated tyrosine kinase	Y
SYTL1	NP_116261	84958	synaptotagmin like 1	Y
TAGLN2	NP_003555	8407	transgelin 2	Y
TATDN1	NP_114415	83940	TatD DNase domain containing 1	Y
TIA1	NP_071505	7072	TIA1 cytotoxic granule associated RNA binding protein	Y
TIAL1	NP_001029097	7073	TIA1 cytotoxic granule associated RNA binding protein like 1	Y
TKT	NP_001055	7086	transketolase	Y
TMOD3	NP_055362	29766	tropomodulin 3	Y
TOLLIP	NP_061882	54472	toll interacting protein	Y
TPI1	NP_000356	7167	triosephosphate isomerase 1	Y
TPM4	NP_003281	7171	tropomyosin 4	Y
TPT1	NP_003286	7178	tumor protein, translationally-controlled 1	Y
TSNAX	NP_005990	7257	translin associated factor X	Y
TUBB1	NP_110400	81027	tubulin beta 1 class VI	Y
TUBB3	NP_006077	10381	tubulin beta 3 class III	Y
TWF1	NP_002813	5756	twinfilin actin binding protein 1	Y
UBA2	NP_005490	10054	ubiquitin like modifier activating enzyme 2	Y
UBE2D3	NP_871621	7323	ubiquitin conjugating enzyme E2 D3	Y
UBE2D4	NP_057067	51619	ubiquitin conjugating enzyme E2 D4 (putative)	Y
UGP2	NP_001001521	7360	UDP-glucose pyrophosphorylase 2	Y
UMPS	NP_000364	7372	uridine monophosphate synthetase	Y
USP5	NP_001092006	8078	ubiquitin specific peptidase 5	Y
VAMP8	NP_003752	8673	vesicle associated membrane protein 8	Y
VCL	NP_054706	7414	vinculin	Y
WDR1	NP_059830	9948	WD repeat domain 1	Y
WDR44	NP_061918	54521	WD repeat domain 44	Y
XRCC5	NP_066964	7520	X-ray repair cross complementing 5	Y
YBX2	NP_057066	51087	Y-box binding protein 2	Y
YWHAE	NP_006752	7531	tyrosine 3-monooxygenase/tryptophan 5-monooxygenase activation protein epsilon	Y
ARF5	NP_001653	381	ADP ribosylation factor 5	Y
ARPC5	NP_005708	10092	actin related protein 2/3 complex subunit 5	Y
ASAP1	NP_060952	50807	ArfGAP with SH3 domain, ankyrin repeat and PH domain 1	Y
ATG3	NP_071933	64422	autophagy related 3	Y
BDH2	NP_064524	56898	3-hydroxybutyrate dehydrogenase 2	Y
BLMH	NP_000377	642	bleomycin hydrolase	Y
BLVRB	NP_000704	645	biliverdin reductase B	Y
BNIP2	NP_004321	663	BCL2 interacting protein 2	Y
BROX	NP_653296	148362	BRO1 domain and CAAX motif containing	Y
BSDC1	NP_060515	55108	BSD domain containing 1	Y
BTK	NP_000052	695	Bruton tyrosine kinase	Y
CAB39	NP_057373	51719	calcium binding protein 39	Y
CAND1	NP_060918	55832	cullin associated and neddylation dissociated 1	Y
CAPZB	NP_004921	832	capping actin protein of muscle Z-line subunit beta	Y
CARM1	NP_954592	10498	coactivator associated arginine methyltransferase 1	Y
CASP3	NP_004337	836	caspase 3	Y
CBX1	NP_001120700	10951	chromobox 1	Y
CBX3	NP_057671	11335	chromobox 3	Y
CBX5	NP_001120794	23468	chromobox 5	Y
CCDC9	NP_056418	26093	coiled-coil domain containing 9	Y
CD81	NP_004347	975	CD81 molecule	Y
CIAO1	NP_004795	9391	cytosolic iron-sulfur assembly component 1	Y
CKAP4	NP_006816	10970	cytoskeleton associated protein 4	Y
CNDP2	NP_060705	55748	carnosine dipeptidase 2	Y
CNPY2	NP_055070	10330	canopy FGF signaling regulator 2	Y
COASY	NP_001035997	80347	Coenzyme A synthase	Y
COMT	NP_009294	1312	catechol-O-methyltransferase	Y
COPZ1	NP_057141	22818	COPI coat complex subunit zeta 1	Y
CORO7	NP_078811	79585	coronin 7	Y
COTL1	NP_066972	23406	coactosin like F-actin binding protein 1	Y
CRIP1	NP_001302	1396	cysteine rich protein 1	Y
CRKL	NP_005198	1399	CRK like proto-oncogene, adaptor protein	Y
CRYL1	NP_057058	51084	crystallin lambda 1	Y
CSK	NP_001120662	1445	C-terminal Src kinase	Y
CSN2	NP_001882	1447	casein beta	Y
CTBP1	NP_001012632	1487	C-terminal binding protein 1	Y
CYRIB	NP_057707	51571	CYFIP related Rac1 interactor B	Y
CZIB	NP_060357	54987	CXXC motif containing zinc binding protein	Y
DCAF7	NP_005819	10238	DDB1 and CUL4 associated factor 7	Y
DCK	NP_000779	1633	deoxycytidine kinase	Y
DDAH1	NP_036269	23576	dimethylarginine dimethylaminohydrolase 1	Y
DDI2	NP_115717	84301	DNA damage inducible 1 homolog 2	Y
DENR	NP_003668	8562	density regulated re-initiation and release factor	Y
DOK3	NP_079148	79930	docking protein 3	Y
DPM3	NP_061846	54344	dolichyl-phosphate mannosyltransferase subunit 3, regulatory	Y
DRG1	NP_004138	4733	developmentally regulated GTP binding protein 1	Y
ECI1	NP_001910	1632	enoyl-CoA delta isomerase 1	Y
EHD1	NP_006786	10938	EH domain containing 1	Y
EHD4	NP_644670	30844	EH domain containing 4	Y
EIF3B	NP_003742	8662	eukaryotic translation initiation factor 3 subunit B	Y
EIF3I	NP_003748	8668	eukaryotic translation initiation factor 3 subunit I	Y
EIF3J	NP_003749	8669	eukaryotic translation initiation factor 3 subunit J	Y
EIF3L	NP_057175	51386	eukaryotic translation initiation factor 3 subunit L	Y
EIPR1	NP_003301	7260	EARP complex and GARP complex interacting protein 1	Y
ERH	NP_004441	2079	ERH mRNA splicing and mitosis factor	Y
EVPL	NP_001979	2125	envoplakin	Y
FCHO1	NP_055937	23149	FCH and mu domain containing endocytic adaptor 1	Y
FEN1	NP_004102	2237	flap structure-specific endonuclease 1	Y
FGR	NP_001036212	2268	FGR proto-oncogene, Src family tyrosine kinase	Y
FKBP3	NP_002004	2287	FKBP prolyl isomerase 3	Y
FLOT1	NP_005794	10211	flotillin 1	Y
FMNL1	NP_005883	752	formin like 1	Y
GALE	NP_001121093	2582	UDP-galactose-4-epimerase	Y
GALK1	NP_000145	2584	galactokinase 1	Y
GALK2	NP_002035	2585	galactokinase 2	Y
GET3	NP_004308	439	guided entry of tail-anchored proteins factor 3, ATPase	Y
GGA1	NP_037497	26088	golgi associated, gamma adaptin ear containing, ARF binding protein 1	Y
GGCT	NP_076956	79017	gamma-glutamylcyclotransferase	Y
GLOD4	NP_057164	51031	glyoxalase domain containing 4	Y
GMDS	NP_001491	2762	GDP-mannose 4,6-dehydratase	Y
GMPPA	NP_995319	29926	GDP-mannose pyrophosphorylase A	Y
GMPPB	NP_068806	29925	GDP-mannose pyrophosphorylase B	Y
GPX1	NP_000572	2876	glutathione peroxidase 1	Y
GRB2	NP_002077	2885	growth factor receptor bound protein 2	Y
GSDMA	NP_835465	284110	gasdermin A	Y
GSDMB	NP_001035936	55876	gasdermin B	Y
GSTP1	NP_000843	2950	glutathione S-transferase pi 1	Y
HBD	NP_000510	3045	hemoglobin subunit delta	Y
HDDC2	NP_057147	51020	HD domain containing 2	Y
HEBP1	NP_057071	50865	heme binding protein 1	Y
HINT1	NP_005331	3094	histidine triad nucleotide binding protein 1	Y
HMGA1	NP_665912	3159	high mobility group AT-hook 1	Y
HMGB2	NP_002120	3148	high mobility group box 2	Y
HMGN2	NP_005508	3151	high mobility group nucleosomal binding domain 2	Y
HSDL2	NP_115679	84263	hydroxysteroid dehydrogenase like 2	Y
IDH3B	NP_008830	3420	isocitrate dehydrogenase (NAD(+)) 3 non-catalytic subunit beta	Y
IFT27	NP_006851	11020	intraflagellar transport 27	Y
IL18	NP_001553	3606	interleukin 18	Y
IMPA1	NP_005527	3612	inositol monophosphatase 1	Y
IRGQ	NP_001007562	126298	immunity related GTPase Q	Y
ISOC1	NP_057132	51015	isochorismatase domain containing 1	Y
IST1	NP_055576	9798	IST1 factor associated with ESCRT-III	Y
JADE1	NP_079176	79960	jade family PHD finger 1	Y
KRT36	NP_003762	8689	keratin 36	Y
KRT82	NP_149022	3888	keratin 82	Y
KRT84	NP_149034	3890	keratin 84	Y
KRT85	NP_002274	3891	keratin 85	Y
LCP2	NP_005556	3937	lymphocyte cytosolic protein 2	Y
LDHB	NP_002291	3945	lactate dehydrogenase B	Y
LSM3	NP_055278	27258	LSM3 homolog, U6 small nuclear RNA and mRNA degradation associated	Y
LSM4	NP_036453	25804	LSM4 homolog, U6 small nuclear RNA and mRNA degradation associated	Y
LSM6	NP_009011	11157	LSM6 homolog, U6 small nuclear RNA and mRNA degradation associated	Y
LXN	NP_064554	56925	latexin	Y
LY6D	NP_003686	8581	lymphocyte antigen 6 family member D	Y
MAPK3	NP_001103361	5595	mitogen-activated protein kinase 3	Y
MAT2B	NP_877725	27430	methionine adenosyltransferase 2B	Y
MCTS1	NP_054779	28985	MCTS1 re-initiation and release factor	Y
MEMO1	NP_057039	51072	mediator of cell motility 1	Y
MTAP	NP_002442	4507	methylthioadenosine phosphorylase	Y
MTPN	NP_665807	136319	myotrophin	Y
MVP	NP_005106	9961	major vault protein	Y
MYCBP	NP_036465	26292	MYC binding protein	Y
MYDGF	NP_061980	56005	myeloid derived growth factor	Y
MYO1F	NP_036467	4542	myosin IF	Y
NAA10	NP_003482	8260	N-alpha-acetyltransferase 10, NatA catalytic subunit	Y
NAA50	NP_079422	80218	N-alpha-acetyltransferase 50, NatE catalytic subunit	Y
NAGK	NP_060037	55577	N-acetylglucosamine kinase	Y
NAMPT	NP_005737	10135	nicotinamide phosphoribosyltransferase	Y
NCF4	NP_000622	4689	neutrophil cytosolic factor 4	Y
NDEL1	NP_001020750	81565	nudE neurodevelopment protein 1 like 1	Y
NDRG1	NP_006087	10397	N-myc downstream regulated 1	Y
NEDD4	NP_006145	4734	NEDD4 E3 ubiquitin protein ligase	Y
NIT2	NP_064587	56954	nitrilase family member 2	Y
NMI	NP_004679	9111	N-myc and STAT interactor	Y
NQO1	NP_001020605	1728	NAD(P)H quinone dehydrogenase 1	Y
NRBF2	NP_110386	29982	nuclear receptor binding factor 2	Y
NSF	NP_006169	4905	N-ethylmaleimide sensitive factor, vesicle fusing ATPase	Y
NUBP1	NP_002475	4682	NUBP iron-sulfur cluster assembly factor 1, cytosolic	Y
NUDT5	NP_054861	11164	nudix hydrolase 5	Y
OGFR	NP_031372	11054	opioid growth factor receptor	Y
OSTF1	NP_036515	26578	osteoclast stimulating factor 1	Y
OTUB1	NP_060140	55611	OTU deubiquitinase, ubiquitin aldehyde binding 1	Y
PBDC1	NP_057584	51260	polysaccharide biosynthesis domain containing 1	Y
PDCD5	NP_004699	9141	programmed cell death 5	Y
PDE12	NP_808881	201626	phosphodiesterase 12	Y
PDIA4	NP_004902	9601	protein disulfide isomerase family A member 4	Y
PDIA6	NP_005733	10130	protein disulfide isomerase family A member 6	Y
PEBP1	NP_002558	5037	phosphatidylethanolamine binding protein 1	Y
PEF1	NP_036524	553115	penta-EF-hand domain containing 1	Y
PGK2	NP_620061	5232	phosphoglycerate kinase 2	Y
PGM2	NP_060760	55276	phosphoglucomutase 2	Y
PLCB3	NP_000923	5331	phospholipase C beta 3	Y
PLCG2	NP_002652	5336	phospholipase C gamma 2	Y
PLCL2	NP_055999	23228	phospholipase C like 2	Y
POF1B	NP_079197	79983	POF1B actin binding protein	Y
PPME1	NP_057231	51400	protein phosphatase methylesterase 1	Y
PRDX1	NP_859048	5052	peroxiredoxin 1	Y
PRDX4	NP_006397	10549	peroxiredoxin 4	Y
PRDX5	NP_036226	25824	peroxiredoxin 5	Y
PREP	NP_002717	5550	prolyl endopeptidase	Y
PSMD1	NP_002798	5707	proteasome 26S subunit, non-ATPase 1	Y
PSMD2	NP_002799	5708	proteasome 26S subunit ubiquitin receptor, non-ATPase 2	Y
PSMD6	NP_055629	9861	proteasome 26S subunit, non-ATPase 6	Y
PSMD9	NP_002804	5715	proteasome 26S subunit, non-ATPase 9	Y
PSME1	NP_788955	5720	proteasome activator subunit 1	Y
PSME2	NP_002809	5721	proteasome activator subunit 2	Y
PSMF1	NP_848693	9491	proteasome inhibitor subunit 1	Y
PTMA	NP_001092755	5757	prothymosin alpha	Y
RAB10	NP_057215	10890	RAB10, member RAS oncogene family	Y
RAB35	NP_006852	11021	RAB35, member RAS oncogene family	Y
RAB5B	NP_002859	5869	RAB5B, member RAS oncogene family	Y
RAB7A	NP_004628	7879	RAB7A, member RAS oncogene family	Y
RAE1	NP_001015885	8480	ribonucleic acid export 1	Y
RAN	NP_006316	5901	RAN, member RAS oncogene family	Y
RAP1B	NP_001010942	5908	RAP1B, member of RAS oncogene family	Y
RBM3	NP_006734	5935	RNA binding motif protein 3	Y
RENBP	NP_002901	5973	renin binding protein	Y
RPA2	NP_002937	6118	replication protein A2	Y
RPIA	NP_653164	22934	ribose 5-phosphate isomerase A	Y
S100P	NP_005971	6286	S100 calcium binding protein P	Y
SAE1	NP_005491	10055	SUMO1 activating enzyme subunit 1	Y
SBDS	NP_057122	51119	SBDS ribosome maturation factor	Y
SBSN	NP_940940	374897	suprabasin	Y
SCRN1	NP_055581	9805	secernin 1	Y
SETD7	NP_085151	80854	SET domain containing 7, histone lysine methyltransferase	Y
SGTB	NP_061945	54557	small glutamine rich tetratricopeptide repeat co-chaperone beta	Y
SHOC2	NP_031399	8036	SHOC2 leucine rich repeat scaffold protein	Y
SHPRH	NP_001036148	257218	SNF2 histone linker PHD RING helicase	Y
SIPA1	NP_694985	6494	signal-induced proliferation-associated 1	Y
SMU1	NP_060695	55234	SMU1 DNA replication regulator and spliceosomal factor	Y
SNX12	NP_037478	29934	sorting nexin 12	Y
SNX2	NP_003091	6643	sorting nexin 2	Y
SNX3	NP_003786	8724	sorting nexin 3	Y
SNX5	NP_689413	27131	sorting nexin 5	Y
SNX6	NP_689419	58533	sorting nexin 6	Y
SNX9	NP_057308	51429	sorting nexin 9	Y
SOCS6	NP_004223	9306	suppressor of cytokine signaling 6	Y
SRA1	NP_001030312	10011	steroid receptor RNA activator 1	Y
SRP14	NP_003125	6727	signal recognition particle 14	Y
SRPRA	NP_003130	6734	SRP receptor subunit alpha	Y
STAM2	NP_005834	10254	signal transducing adaptor molecule 2	Y
STK24	NP_001027467	8428	serine/threonine kinase 24	Y
STK26	NP_001035917	51765	serine/threonine kinase 26	Y
STK3	NP_006272	6788	serine/threonine kinase 3	Y
STRAP	NP_009109	11171	serine/threonine kinase receptor associated protein	Y
STRN3	NP_001077362	29966	striatin 3	Y
STX12	NP_803173	23673	syntaxin 12	Y
STX7	NP_003560	8417	syntaxin 7	Y
SUMO2	NP_001005849	6613	small ubiquitin like modifier 2	Y
TBCA	NP_004598	6902	tubulin folding cofactor A	Y
TBCB	NP_001272	1155	tubulin folding cofactor B	Y
TBCE	NP_001072983	6905	tubulin folding cofactor E	Y
TES	NP_690042	26136	testin LIM domain protein	Y
THOP1	NP_003240	7064	thimet oligopeptidase 1	Y
TIGAR	NP_065108	57103	TP53 induced glycolysis regulatory phosphatase	Y
TIPRL	NP_001026970	261726	TOR signaling pathway regulator	Y
TKFC	NP_056348	26007	triokinase and FMN cyclase	Y
TNPO1	NP_694858	3842	transportin 1	Y
TPMT	NP_000358	7172	thiopurine S-methyltransferase	Y
TSBP1	NP_006772	10665	testis expressed basic protein 1	Y
TXNL1	NP_004777	9352	thioredoxin like 1	Y
UBA5	NP_079094	79876	ubiquitin like modifier activating enzyme 5	Y
UBB	NP_061828	7314	ubiquitin B	Y
UBE2K	NP_001104582	3093	ubiquitin conjugating enzyme E2 K	Y
UBE2N	NP_003339	7334	ubiquitin conjugating enzyme E2 N	Y
UBE2Z	NP_075567	65264	ubiquitin conjugating enzyme E2 Z	Y
UBXN6	NP_079517	80700	UBX domain protein 6	Y
UFC1	NP_057490	51506	ubiquitin-fold modifier conjugating enzyme 1	Y
UFD1	NP_001030324	7353	ubiquitin recognition factor in ER associated degradation 1	Y
UFL1	NP_056138	23376	UFM1 specific ligase 1	Y
VAT1	NP_006364	10493	vesicle amine transport 1	Y
VPS29	NP_057310	51699	VPS29 retromer complex component	Y
VPS4A	NP_037377	27183	vacuolar protein sorting 4 homolog A	Y
VPS4B	NP_004860	9525	vacuolar protein sorting 4 homolog B	Y
ARHGAP1	NP_004299	392	Rho GTPase activating protein 1	Y
C1GALT1	NP_064541	56913	core 1 synthase, glycoprotein-N-acetylgalactosamine 3-beta-galactosyltransferase 1	Y
C8G	NP_000597	733	complement C8 gamma chain	Y
CARHSP1	NP_001035941	23589	calcium regulated heat stable protein 1	Y
DMKN	NP_001119529	93099	dermokine	Y
DNAJB9	NP_036460	4189	DnaJ heat shock protein family (Hsp40) member B9	Y
ENDOD1	NP_055851	23052	endonuclease domain containing 1	Y
FAM3C	NP_001035109	10447	FAM3 metabolism regulating signaling molecule C	Y
FUT8	NP_835368	2530	fucosyltransferase 8	Y
GALNT16	NP_065743	57452	polypeptide N-acetylgalactosaminyltransferase 16	Y
GALNT7	NP_059119	51809	polypeptide N-acetylgalactosaminyltransferase 7	Y
GDI1	NP_001484	2664	GDP dissociation inhibitor 1	Y
GNAS	NP_001070957	2778	GNAS complex locus	Y
HAGH	NP_005317	3029	hydroxyacylglutathione hydrolase	Y
JPT1	NP_001002032	51155	Jupiter microtubule associated homolog 1	Y
LYZ	NP_000230	4069	lysozyme	Y
MAPKAPK2	NP_116584	9261	MAPK activated protein kinase 2	Y
NENF	NP_037481	29937	neudesin neurotrophic factor	Y
NSFL1C	NP_061327	55968	NSFL1 cofactor	Y
PDCD6IP	NP_037506	10015	programmed cell death 6 interacting protein	Y
PITHD1	NP_065095	57095	PITH domain containing 1	Y
POMGNT1	NP_060209	55624	protein O-linked mannose N-acetylglucosaminyltransferase 1 (beta 1,2-)	Y
PYM1	NP_115721	84305	PYM homolog 1, exon junction complex associated factor	Y
RAB18	NP_067075	22931	RAB18, member RAS oncogene family	Y
RBP4	NP_006735	5950	retinol binding protein 4	Y
SDF2L1	NP_071327	23753	stromal cell derived factor 2 like 1	Y
SH3GLB2	NP_064530	56904	SH3 domain containing GRB2 like, endophilin B2	Y
SHMT1	NP_683718	6470	serine hydroxymethyltransferase 1	Y
SLC9A3R1	NP_004243	9368	SLC9A3 regulator 1	Y
TGFBI	NP_000349	7045	transforming growth factor beta induced	Y
TMSB10	NP_066926	9168	thymosin beta 10	Y
WBP2	NP_036610	23558	WW domain binding protein 2	Y
WDR77	NP_077007	79084	WD repeat domain 77	Y
BPIFA1	NP_570913	51297	BPI fold containing family A member 1	Y
CASP1	NP_150634	834	caspase 1	Y
CDA	NP_001776	978	cytidine deaminase	Y
CST3	NP_000090	1471	cystatin C	Y
DNAJC3	NP_006251	5611	DnaJ heat shock protein family (Hsp40) member C3	Y
MANF	NP_006001	7873	mesencephalic astrocyte derived neurotrophic factor	Y
MNDA	NP_002423	4332	myeloid cell nuclear differentiation antigen	Y
PRH2	NP_001103683	5555	proline rich protein HaeIII subfamily 2	Y
SLC39A12	NP_689938	221074	solute carrier family 39 member 12	Y
SLPI	NP_003055	6590	secretory leukocyte peptidase inhibitor	Y
SUB1	NP_006704	10923	SUB1 regulator of transcription	Y
TCN2	NP_000346	6948	transcobalamin 2	Y
TNFSF10	NP_003801	8743	TNF superfamily member 10	Y
TOM1	NP_005479	10043	target of myb1 membrane trafficking protein	Y
VCP	NP_009057	7415	valosin containing protein	Y
AARS1	NP_001596	16	alanyl-tRNA synthetase 1	N
ABHD14B	NP_116139	84836	abhydrolase domain containing 14B	N
ACADM	NP_001120800	34	acyl-CoA dehydrogenase medium chain	N
ACAP1	NP_055531	9744	ArfGAP with coiled-coil, ankyrin repeat and PH domains 1	N
ACTR3	NP_005712	10096	actin related protein 3	N
ACY1	NP_000657	95	aminoacylase 1	N
ACYP1	NP_001098	97	acylphosphatase 1	N
ADH7	NP_000664	131	alcohol dehydrogenase 7 (class IV), mu or sigma polypeptide	N
ADPGK	NP_112574	83440	ADP dependent glucokinase	N
AGAP2	NP_001116244	116986	ArfGAP with GTPase domain, ankyrin repeat and PH domain 2	N
AGR2	NP_006399	10551	anterior gradient 2, protein disulphide isomerase family member	N
AIF1L	NP_113614	83543	allograft inflammatory factor 1 like	N
AK1	NP_000467	203	adenylate kinase 1	N
AK2	NP_001616	204	adenylate kinase 2	N
AKR1B10	NP_064695	57016	aldo-keto reductase family 1 member B10	N
AKR1C2	NP_995317	1646	aldo-keto reductase family 1 member C2	N
AKR1E2	NP_001035267	83592	aldo-keto reductase family 1 member E2	N
AKR7A2	NP_003680	8574	aldo-keto reductase family 7 member A2	N
ALDH1A3	NP_000684	220	aldehyde dehydrogenase 1 family member A3	N
ANG	NP_001091046	283	angiogenin	N
ANKK1	NP_848605	255239	ankyrin repeat and kinase domain containing 1	N
ANP32A	NP_006296	8125	acidic nuclear phosphoprotein 32 family member A	N
ANXA5	NP_001145	308	annexin A5	N
APBB1IP	NP_061916	54518	amyloid beta precursor protein binding family B member 1 interacting protein	N
APOL2	NP_663612	23780	apolipoprotein L2	N
APRT	NP_001025189	353	adenine phosphoribosyltransferase	N
GABARAP	NP_009209	11337	GABA type A receptor-associated protein	N
GABARAPL2	NP_009216	11345	GABA type A receptor associated protein like 2	N
GALNT12	NP_078918	79695	polypeptide N-acetylgalactosaminyltransferase 12	N
IFI35	NP_005524	3430	interferon induced protein 35	N
IFITM1	NP_003632	8519	interferon induced transmembrane protein 1	N
IL36G	NP_062564	56300	interleukin 36 gamma	N
IL36RN	NP_775262	26525	interleukin 36 receptor antagonist	N
IMPA2	NP_055029	3613	inositol monophosphatase 2	N
IVD	NP_002216	3712	isovaleryl-CoA dehydrogenase	N
IVL	NP_005538	3713	involucrin	N
KCTD12	NP_612453	115207	potassium channel tetramerization domain containing 12	N
KLK14	NP_071329	43847	kallikrein related peptidase 14	N
KRT14	NP_000517	3861	keratin 14	N
KRT23	NP_056330	25984	keratin 23	N
KRT35	NP_002271	3886	keratin 35	N
KRT4	NP_002263	3851	keratin 4	N
KRT73	NP_778238	319101	keratin 73	N
KRT74	NP_778223	121391	keratin 74	N
KRT76	NP_056932	51350	keratin 76	N
KRT78	NP_775487	196374	keratin 78	N
KRT83	NP_002273	3889	keratin 83	N
KYAT3	NP_001008662	56267	kynurenine aminotransferase 3	N
LAMTOR1	NP_060377	55004	late endosomal/lysosomal adaptor, MAPK and MTOR activator 1	N
LCN1	NP_002288	3933	lipocalin 1	N
LCN15	NP_976222	389812	lipocalin 15	N
LSM7	NP_057283	51690	LSM7 homolog, U6 small nuclear RNA and mRNA degradation associated	N
LUC7L2	NP_057103	51631	LUC7 like 2, pre-mRNA splicing factor	N
LYNX1-SLURP2	NP_076435	111188157	LYNX1-SLURP2 readthrough	N
LZTFL1	NP_065080	54585	leucine zipper transcription factor like 1	N
MAB21L4	NP_001078906	79919	mab-21 like 4	N
MAPKAPK3	NP_004626	7867	MAPK activated protein kinase 3	N
STX3	NP_004168	6809	syntaxin 3	N
STXBP2	NP_001120868	6813	syntaxin binding protein 2	N
STXBP5	NP_001121187	134957	syntaxin binding protein 5	N
SUMO4	NP_001002255	387082	small ubiquitin like modifier 4	N
TAC1	NP_054702	6863	tachykinin precursor 1	N
TAX1BP3	NP_055419	30851	Tax1 binding protein 3	N
TCP1	NP_001008897	6950	t-complex 1	N
THEMIS2	NP_001099026	9473	thymocyte selection associated family member 2	N
TXN	NP_003320	7295	thioredoxin	N
UBE2E1	NP_872607	7324	ubiquitin conjugating enzyme E2 E1	N
UBE2G1	NP_003333	7326	ubiquitin conjugating enzyme E2 G1	N
UBE2I	NP_919237	7329	ubiquitin conjugating enzyme E2 I	N
UBE2L3	NP_003338	7332	ubiquitin conjugating enzyme E2 L3	N
UBE2M	NP_003960	9040	ubiquitin conjugating enzyme E2 M	N
UBE2NL	NP_001013007	389898	ubiquitin conjugating enzyme E2 N like (gene/pseudogene)	N
UBL4A	NP_055050	8266	ubiquitin like 4A	N
UNC119	NP_473376	9094	unc-119 lipid binding chaperone	N
ASS1	NP_000041	445	argininosuccinate synthase 1	N
ATP6AP2	NP_005756	10159	ATPase H+ transporting accessory protein 2	N
ATP6V1E1	NP_001034455	529	ATPase H+ transporting V1 subunit E1	N
ATP6V1F	NP_004222	9296	ATPase H+ transporting V1 subunit F	N
ATP6V1G1	NP_004879	9550	ATPase H+ transporting V1 subunit G1	N
ATP6V1H	NP_057025	51606	ATPase H+ transporting V1 subunit H	N
BLOC1S1	NP_001478	2647	biogenesis of lysosomal organelles complex 1 subunit 1	N
BLVRA	NP_000703	644	biliverdin reductase A	N
BRK1	NP_060932	55845	BRICK1 subunit of SCAR/WAVE actin nucleating complex	N
C11orf58	NP_055082	10944	chromosome 11 open reading frame 58	N
C19orf33	NP_277055	64073	chromosome 19 open reading frame 33	N
C1orf116	NP_001077393	79098	chromosome 1 open reading frame 116	N
C20orf27	NP_001034229	54976	chromosome 20 open reading frame 27	N
CA2	NP_000058	760	carbonic anhydrase 2	N
CAB39L	NP_112187	81617	calcium binding protein 39 like	N
CACYBP	NP_001007215	27101	calcyclin binding protein	N
CALB2	NP_001731	794	calbindin 2	N
CAPZA2	NP_006127	830	capping actin protein of muscle Z-line subunit alpha 2	N
CASP14	NP_036246	23581	caspase 14	N
CCDC43	NP_653210	124808	coiled-coil domain containing 43	N
CCDC88B	NP_115627	283234	coiled-coil domain containing 88B	N
CCT5	NP_036205	22948	chaperonin containing TCP1 subunit 5	N
CDK6	NP_001250	1021	cyclin dependent kinase 6	N
CHID1	NP_076436	66005	chitinase domain containing 1	N
CHKB	NP_005189	1120	choline kinase beta	N
CHMP1B	NP_065145	57132	charged multivesicular body protein 1B	N
CHMP3	NP_057163	51652	charged multivesicular body protein 3	N
CHMP4B	NP_789782	128866	charged multivesicular body protein 4B	N
CHMP6	NP_078867	79643	charged multivesicular body protein 6	N
CIAO2A	NP_001014812	84191	cytosolic iron-sulfur assembly component 2A	N
CLTB	NP_009028	1212	clathrin light chain B	N
CNP	NP_149124	1267	2',3'-cyclic nucleotide 3' phosphodiesterase	N
COPS5	NP_006828	10987	COP9 signalosome subunit 5	N
CRACR2A	NP_116069	84766	calcium release activated channel regulator 2A	N
CST1	NP_001889	1469	cystatin SN	N
CST2	NP_001313	1470	cystatin SA	N
CST4	NP_001890	1472	cystatin S	N
CST5	NP_001891	1473	cystatin D	N
CTNNA1	NP_001894	1495	catenin alpha 1	N
CXorf38	NP_659407	159013	chromosome X open reading frame 38	N
CYBA	NP_000092	1535	cytochrome b-245 alpha chain	N
CYCS	NP_061820	54205	cytochrome c, somatic	N
DARS1	NP_001340	1615	aspartyl-tRNA synthetase 1	N
DBI	NP_001073332	1622	diazepam binding inhibitor, acyl-CoA binding protein	N
DCTN6	NP_006562	10671	dynactin subunit 6	N
DDX39A	NP_005795	10212	DExD-box helicase 39A	N
DEFA1	NP_004075	1667	defensin alpha 1	N
DHRS11	NP_077284	79154	dehydrogenase/reductase 11	N
DIPK2A	NP_775823	205428	divergent protein kinase domain 2A	N
DNAJB6	NP_490647	10049	DnaJ heat shock protein family (Hsp40) member B6	N
DNAJC7	NP_003306	7266	DnaJ heat shock protein family (Hsp40) member C7	N
DTYMK	NP_036277	1841	deoxythymidylate kinase	N
EEF1B2	NP_066944	1933	eukaryotic translation elongation factor 1 beta 2	N
EFHD1	NP_079478	80303	EF-hand domain family member D1	N
EIF5A2	NP_065123	56648	eukaryotic translation initiation factor 5A2	N
EML2	NP_036287	24139	EMAP like 2	N
ENDOU	NP_006016	8909	endonuclease, poly(U) specific	N
ESD	NP_001975	2098	esterase D	N
ETHE1	NP_055112	23474	ETHE1 persulfide dioxygenase	N
EXOSC1	NP_057130	51013	exosome component 1	N
FAHD1	NP_112485	81889	fumarylacetoacetate hydrolase domain containing 1	N
FAHD2A	NP_057128	51011	fumarylacetoacetate hydrolase domain containing 2A	N
FAM110B	NP_671722	90362	family with sequence similarity 110 member B	N
FDPS	NP_001995	2224	farnesyl diphosphate synthase	N
FKBP1A	NP_463460	2280	FKBP prolyl isomerase 1A	N
GALT	NP_000146	2592	galactose-1-phosphate uridylyltransferase	N
[truncated: 159 more rows]

## Sheet: Lung Tissue
Gene	Entrezgene	Protein Name
A1BG	1	alpha-1-B glycoprotein
A1CF	29974	APOBEC1 complementation factor
A2M	2	alpha-2-macroglobulin
A2ML1	144568	alpha-2-macroglobulin like 1
A4GALT	53947	alpha 1,4-galactosyltransferase (P blood group)
AAAS	8086	aladin WD repeat nucleoporin
AACS	65985	acetoacetyl-CoA synthetase
AADAC	13	arylacetamide deacetylase
AADAT	51166	aminoadipate aminotransferase
AAGAB	79719	alpha and gamma adaptin binding protein
AAK1	22848	AP2 associated kinase 1
AAMDC	28971	adipogenesis associated Mth938 domain containing
AAMP	14	angio associated migratory cell protein
AAR2	25980	AAR2 splicing factor
AARS	16	alanyl-tRNA synthetase 1
AARS2	57505	alanyl-tRNA synthetase 2, mitochondrial
AARSD1	80755	alanyl-tRNA synthetase domain containing 1
AASDH	132949	aminoadipate-semialdehyde dehydrogenase
AASDHPPT	60496	aminoadipate-semialdehyde dehydrogenase-phosphopantetheinyl transferase
AASS	10157	aminoadipate-semialdehyde synthase
AATF	26574	apoptosis antagonizing transcription factor
ABAT	18	4-aminobutyrate aminotransferase
ABCA1	19	ATP binding cassette subfamily A member 1
ABCA12	26154	ATP binding cassette subfamily A member 12
ABCA2	20	ATP binding cassette subfamily A member 2
ABCA3	21	ATP binding cassette subfamily A member 3
ABCA6	23460	ATP binding cassette subfamily A member 6
ABCA7	10347	ATP binding cassette subfamily A member 7
ABCA8	10351	ATP binding cassette subfamily A member 8
ABCA9	10350	ATP binding cassette subfamily A member 9
ABCB1	5243	ATP binding cassette subfamily B member 1
ABCB10	23456	ATP binding cassette subfamily B member 10
ABCB11	8647	ATP binding cassette subfamily B member 11
ABCB6	10058	ATP binding cassette subfamily B member 6 (Langereis blood group)
ABCB7	22	ATP binding cassette subfamily B member 7
ABCB8	11194	ATP binding cassette subfamily B member 8
ABCB9	23457	ATP binding cassette subfamily B member 9
ABCC1	4363	ATP binding cassette subfamily C member 1
ABCC10	89845	ATP binding cassette subfamily C member 10
ABCC2	1244	ATP binding cassette subfamily C member 2
ABCC3	8714	ATP binding cassette subfamily C member 3
ABCC4	10257	ATP binding cassette subfamily C member 4
ABCC5	10057	ATP binding cassette subfamily C member 5
ABCC6	368	ATP binding cassette subfamily C member 6
ABCC9	10060	ATP binding cassette subfamily C member 9
ABCD1	215	ATP binding cassette subfamily D member 1
ABCD3	5825	ATP binding cassette subfamily D member 3
ABCD4	5826	ATP binding cassette subfamily D member 4
ABCE1	6059	ATP binding cassette subfamily E member 1
ABCF1	23	ATP binding cassette subfamily F member 1
ABCF2	10061	ATP binding cassette subfamily F member 2
ABCF3	55324	ATP binding cassette subfamily F member 3
ABCG1	9619	ATP binding cassette subfamily G member 1
ABCG2	9429	ATP binding cassette subfamily G member 2 (Junior blood group)
ABHD10	55347	abhydrolase domain containing 10, depalmitoylase
ABHD11	83451	abhydrolase domain containing 11
ABHD12	26090	abhydrolase domain containing 12, lysophospholipase
ABHD13	84945	abhydrolase domain containing 13
ABHD14A	25864	abhydrolase domain containing 14A
ABHD14B	84836	abhydrolase domain containing 14B
ABHD16A	7920	abhydrolase domain containing 16A, phospholipase
ABHD17A	81926	abhydrolase domain containing 17A, depalmitoylase
ABHD17B	51104	abhydrolase domain containing 17B, depalmitoylase
ABHD17C	58489	abhydrolase domain containing 17C, depalmitoylase
ABHD2	11057	abhydrolase domain containing 2, acylglycerol lipase
ABHD3	171586	abhydrolase domain containing 3, phospholipase
ABHD4	63874	abhydrolase domain containing 4, N-acyl phospholipase B
ABHD5	51099	abhydrolase domain containing 5, lysophosphatidic acid acyltransferase
ABHD6	57406	abhydrolase domain containing 6, acylglycerol lipase
ABI1	10006	abl interactor 1
ABI2	10152	abl interactor 2
ABI3	51225	ABI family member 3
ABI3BP	25890	ABI family member 3 binding protein
FAM206A	54942	actin binding transcription modulator
ABL1	25	ABL proto-oncogene 1, non-receptor tyrosine kinase
ABL2	27	ABL proto-oncogene 2, non-receptor tyrosine kinase
ABLIM1	3983	actin binding LIM protein 1
ABLIM2	84448	actin binding LIM protein family member 2
ABLIM3	22885	actin binding LIM protein family member 3
ABO	28	ABO, alpha 1-3-N-acetylgalactosaminyltransferase and alpha 1-3-galactosyltransferase
ABR	29	ABR activator of RhoGEF and GTPase
ABRACL	58527	ABRA C-terminal like
FAM175A	84142	abraxas 1, BRCA1 A complex subunit
FAM175B	23172	abraxas 2, BRISC complex subunit
ABT1	29777	activator of basal transcription 1
ABTB2	25841	ankyrin repeat and BTB domain containing 2
BTBD11	121551	ankyrin repeat and BTB domain containing 3
ACAA1	30	acetyl-CoA acyltransferase 1
ACAA2	10449	acetyl-CoA acyltransferase 2
ACACA	31	acetyl-CoA carboxylase alpha
ACAD10	80724	acyl-CoA dehydrogenase family member 10
ACAD11	84129	acyl-CoA dehydrogenase family member 11
ACAD8	27034	acyl-CoA dehydrogenase family member 8
ACAD9	28976	acyl-CoA dehydrogenase family member 9
ACADL	33	acyl-CoA dehydrogenase long chain
ACADM	34	acyl-CoA dehydrogenase medium chain
ACADS	35	acyl-CoA dehydrogenase short chain
ACADSB	36	acyl-CoA dehydrogenase short/branched chain
ACADVL	37	acyl-CoA dehydrogenase very long chain
ACAN	176	aggrecan
ACAP1	9744	ArfGAP with coiled-coil, ankyrin repeat and PH domains 1
ACAP2	23527	ArfGAP with coiled-coil, ankyrin repeat and PH domains 2
ACAP3	116983	ArfGAP with coiled-coil, ankyrin repeat and PH domains 3
ACBD3	64746	acyl-CoA binding domain containing 3
ACBD4	79777	acyl-CoA binding domain containing 4
ACBD5	91452	acyl-CoA binding domain containing 5
ACBD6	84320	acyl-CoA binding domain containing 6
ACD	65057	ACD shelterin complex subunit and telomerase recruitment factor
TPP1	65057	ACD shelterin complex subunit and telomerase recruitment factor
ACE	1636	angiotensin I converting enzyme
ACE2	59272	angiotensin converting enzyme 2
ACHE	43	acetylcholinesterase (Cartwright blood group)
ACIN1	22985	apoptotic chromatin condensation inducer 1
ACKR1	2532	atypical chemokine receptor 1 (Duffy blood group)
ACKR3	57007	atypical chemokine receptor 3
ACLY	47	ATP citrate lyase
ACO1	48	aconitase 1
ACO2	50	aconitase 2
IRG1	730249	aconitate decarboxylase 1
ACOT1	641371	acyl-CoA thioesterase 1
ACOT11	26027	acyl-CoA thioesterase 11
ACOT13	55856	acyl-CoA thioesterase 13
ACOT2	10965	acyl-CoA thioesterase 2
ACOT4	122970	acyl-CoA thioesterase 4
ACOT7	11332	acyl-CoA thioesterase 7
ACOT8	10005	acyl-CoA thioesterase 8
ACOT9	23597	acyl-CoA thioesterase 9
ACOX1	51	acyl-CoA oxidase 1
ACOX2	8309	acyl-CoA oxidase 2
ACOX3	8310	acyl-CoA oxidase 3, pristanoyl
ACP2	53	acid phosphatase 2, lysosomal
ACPP	55	acid phosphatase 3
ACP5	54	acid phosphatase 5, tartrate resistant
ACP6	51205	acid phosphatase 6, lysophosphatidic
ACSF2	80221	acyl-CoA synthetase family member 2
ACSF3	197322	acyl-CoA synthetase family member 3
ACSL1	2180	acyl-CoA synthetase long chain family member 1
ACSL3	2181	acyl-CoA synthetase long chain family member 3
ACSL4	2182	acyl-CoA synthetase long chain family member 4
ACSL5	51703	acyl-CoA synthetase long chain family member 5
ACSL6	23305	acyl-CoA synthetase long chain family member 6
ACSM3	6296	acyl-CoA synthetase medium chain family member 3
ACSM5	54988	acyl-CoA synthetase medium chain family member 5
ACSS1	84532	acyl-CoA synthetase short chain family member 1
ACSS2	55902	acyl-CoA synthetase short chain family member 2
ACSS3	79611	acyl-CoA synthetase short chain family member 3
ACTA1	58	actin alpha 1, skeletal muscle
ACTA2	59	actin alpha 2, smooth muscle
ACTB	60	actin beta
ACTBL2	345651	actin beta like 2
ACTC1	70	actin alpha cardiac muscle 1
ACTG1	71	actin gamma 1
ACTG2	72	actin gamma 2, smooth muscle
ACTL6A	86	actin like 6A
ACTL8	81569	actin like 8
ACTN1	87	actinin alpha 1
ACTN2	88	actinin alpha 2
ACTN4	81	actinin alpha 4
ACTR10	55860	actin related protein 10
ACTR1A	10121	actin related protein 1A
ACTR1B	10120	actin related protein 1B
ACTR2	10097	actin related protein 2
ACTR3	10096	actin related protein 3
ACTR3B	57180	actin related protein 3B
ACTR5	79913	actin related protein 5
ACTR6	64431	actin related protein 6
ACTR8	93973	actin related protein 8
ACVR1	90	activin A receptor type 1
ACVR1B	91	activin A receptor type 1B
ACVRL1	94	activin A receptor like type 1
ACY1	95	aminoacylase 1
ACY3	91703	aminoacylase 3
ACYP1	97	acylphosphatase 1
ACYP2	98	acylphosphatase 2
ADA	100	adenosine deaminase
CECR1	51816	adenosine deaminase 2
ADAM10	102	ADAM metallopeptidase domain 10
ADAM12	8038	ADAM metallopeptidase domain 12
ADAM15	8751	ADAM metallopeptidase domain 15
ADAM17	6868	ADAM metallopeptidase domain 17
ADAM22	53616	ADAM metallopeptidase domain 22
ADAM28	10863	ADAM metallopeptidase domain 28
ADAM8	101	ADAM metallopeptidase domain 8
ADAM9	8754	ADAM metallopeptidase domain 9
ADAMDEC1	27299	ADAM like decysin 1
ADAMTS1	9510	ADAM metallopeptidase with thrombospondin type 1 motif 1
ADAMTS12	81792	ADAM metallopeptidase with thrombospondin type 1 motif 12
ADAMTS16	170690	ADAM metallopeptidase with thrombospondin type 1 motif 16
ADAMTS2	9509	ADAM metallopeptidase with thrombospondin type 1 motif 2
ADAMTS4	9507	ADAM metallopeptidase with thrombospondin type 1 motif 4
ADAMTS5	11096	ADAM metallopeptidase with thrombospondin type 1 motif 5
ADAMTS7	11173	ADAM metallopeptidase with thrombospondin type 1 motif 7
ADAMTSL1	92949	ADAMTS like 1
ADAMTSL2	9719	ADAMTS like 2
ADAMTSL3	57188	ADAMTS like 3
ADAMTSL4	54507	ADAMTS like 4
ADAMTSL5	339366	ADAMTS like 5
ADAP1	11033	ArfGAP with dual PH domains 1
ADAP2	55803	ArfGAP with dual PH domains 2
ADAR	103	adenosine deaminase RNA specific
ADARB1	104	adenosine deaminase RNA specific B1
ADAT1	23536	adenosine deaminase tRNA specific 1
ADAT2	134637	adenosine deaminase tRNA specific 2
ADCK1	57143	aarF domain containing kinase 1
ADCK5	203054	aarF domain containing kinase 5
ADCY4	196883	adenylate cyclase 4
ADCY6	112	adenylate cyclase 6
ADCY7	113	adenylate cyclase 7
ADCY3	114	adenylate cyclase 8
ADCY9	115	adenylate cyclase 9
ADD1	118	adducin 1
ADD2	119	adducin 2
ADD3	120	adducin 3
GPR124	25960	adhesion G protein-coupled receptor A2
CD97	30817	adhesion G protein-coupled receptor E2
EMR2	30817	adhesion G protein-coupled receptor E2
EMR3	84658	adhesion G protein-coupled receptor E3
GPR110	266977	adhesion G protein-coupled receptor F1
GPR116	221395	adhesion G protein-coupled receptor F5
GPR56	9289	adhesion G protein-coupled receptor G1
GPR64	10149	adhesion G protein-coupled receptor G2
GPR97	222487	adhesion G protein-coupled receptor G3
GPR126	57211	adhesion G protein-coupled receptor G6
LPHN2	23266	adhesion G protein-coupled receptor L2
LPHN3	23284	adhesion G protein-coupled receptor L3
ELTD1	64123	adhesion G protein-coupled receptor L4
ADH1B	125	alcohol dehydrogenase 1B (class I), beta polypeptide
ADH1C	126	alcohol dehydrogenase 1C (class I), gamma polypeptide
ADH5	128	alcohol dehydrogenase 5 (class III), chi polypeptide
ADH6	130	alcohol dehydrogenase 6 (class V)
ADH7	131	alcohol dehydrogenase 7 (class IV), mu or sigma polypeptide
ADHFE1	137872	alcohol dehydrogenase iron containing 1
ADI1	55256	acireductone dioxygenase 1
ADIPOQ	9370	adiponectin, C1Q and collagen domain containing
ADIRF	10974	adipogenesis regulatory factor
ADK	132	adenosine kinase
ADM	133	adrenomedullin
ADNP	23394	activity dependent neuroprotector homeobox
ADO	84890	2-aminoethanethiol dioxygenase
ADPGK	83440	ADP dependent glucokinase
ADPRH	141	ADP-ribosylarginine hydrolase
ADPRHL2	54936	ADP-ribosylserine hydrolase
ADRA2A	150	adrenoceptor alpha 2A
ADRB2	154	adrenoceptor beta 2
ADRM1	11047	ADRM1 26S proteasome ubiquitin receptor
ADSL	158	adenylosuccinate lyase
ASL	158	adenylosuccinate lyase
ADSSL1	122622	adenylosuccinate synthase 1
ADSS	159	adenylosuccinate synthase 2
AEBP1	165	AE binding protein 1
AEBP2	121536	AE binding protein 2
AFAP1	60312	actin filament associated protein 1
AFAP1L1	134265	actin filament associated protein 1 like 1
AFAP1L2	84632	actin filament associated protein 1 like 2
MLLT4	4301	afadin, adherens junction formation factor
AFF1	4299	ALF transcription elongation factor 1
AFF4	27125	ALF transcription elongation factor 4
LACE1	246269	AFG1 like ATPase
AFG3L2	10939	AFG3 like matrix AAA peptidase subunit 2
AFM	173	afamin
AFMID	125061	arylformamidase
AFTPH	54812	aftiphilin
AGA	175	aspartylglucosaminidase
AGAP1	116987	ArfGAP with GTPase domain, ankyrin repeat and PH domain 1
AGAP2	116986	ArfGAP with GTPase domain, ankyrin repeat and PH domain 2
AGAP3	116988	ArfGAP with GTPase domain, ankyrin repeat and PH domain 3
AGER	177	advanced glycosylation end-product specific receptor
AGFG1	3267	ArfGAP with FG repeats 1
AGFG2	3268	ArfGAP with FG repeats 2
AGGF1	55109	angiogenic factor with G-patch and FHA domains 1
AGK	55750	acylglycerol kinase
AGL	178	amylo-alpha-1, 6-glucosidase, 4-alpha-glucanotransferase
AGMAT	79814	agmatinase
AGO1	26523	argonaute RISC component 1
AGO2	27161	argonaute RISC catalytic component 2
AGO3	192669	argonaute RISC catalytic component 3
AGPAT1	10554	1-acylglycerol-3-phosphate O-acyltransferase 1
AGPAT2	10555	1-acylglycerol-3-phosphate O-acyltransferase 2
AGPAT3	56894	1-acylglycerol-3-phosphate O-acyltransferase 3
AGPAT4	56895	1-acylglycerol-3-phosphate O-acyltransferase 4
AGPAT5	55326	1-acylglycerol-3-phosphate O-acyltransferase 5
AGPS	8540	alkylglycerone phosphate synthase
AGR2	10551	anterior gradient 2, protein disulphide isomerase family member
AGR3	155465	anterior gradient 3, protein disulphide isomerase family member
AGRN	375790	agrin
AGTPBP1	23287	ATP/GTP binding carboxypeptidase 1
AGTRAP	57085	angiotensin II receptor associated protein
AGT	189	alanine--glyoxylate aminotransferase
AGXT2	64902	alanine--glyoxylate aminotransferase 2
AHCTF1	25909	AT-hook containing transcription factor 1
AHCY	191	adenosylhomocysteinase
AHCYL1	10768	adenosylhomocysteinase like 1
AHCYL2	23382	adenosylhomocysteinase like 2
AHDC1	27245	AT-hook DNA binding motif containing 1
AHNAK	79026	AHNAK nucleoprotein
AHNAK2	113146	AHNAK nucleoprotein 2
AHR	196	aryl hydrocarbon receptor
AHSA1	10598	activator of HSP90 ATPase activity 1
AHSG	197	alpha 2-HS glycoprotein
AHSP	51327	alpha hemoglobin stabilizing protein
AIF1	199	allograft inflammatory factor 1
AIF1L	83543	allograft inflammatory factor 1 like
AIFM1	9131	apoptosis inducing factor mitochondria associated 1
AIFM2	84883	apoptosis inducing factor mitochondria associated 2
AIG1	51390	androgen induced 1
AIM2	9447	absent in melanoma 2
AIMP1	9255	aminoacyl tRNA synthetase complex interacting multifunctional protein 1
AIMP2	7965	aminoacyl tRNA synthetase complex interacting multifunctional protein 2
AJUBA	84962	ajuba LIM protein
AK1	203	adenylate kinase 1
AK2	204	adenylate kinase 2
AK3	205	adenylate kinase 4
AK4	205	adenylate kinase 4
AK6	26289	adenylate kinase 5
AK8	158067	adenylate kinase 8
DDX31	158067	adenylate kinase 8
AKAP1	8165	A-kinase anchoring protein 1
AKAP10	11216	A-kinase anchoring protein 10
AKAP11	11215	A-kinase anchoring protein 11
AKAP12	9590	A-kinase anchoring protein 12
AKAP13	11214	A-kinase anchoring protein 13
AKAP17A	8227	A-kinase anchoring protein 17A
AKAP5	9495	A-kinase anchoring protein 5
AKAP7	9465	A-kinase anchoring protein 7
AKAP8	10270	A-kinase anchoring protein 8
AKAP8L	26993	A-kinase anchoring protein 8 like
AKAP9	10142	A-kinase anchoring protein 9
AKNA	80709	AT-hook transcription factor
AKR1A1	10327	aldo-keto reductase family 1 member A1
AKR1B1	231	aldo-keto reductase family 1 member B
AKR1B10	57016	aldo-keto reductase family 1 member B10
ARL1	57016	aldo-keto reductase family 1 member B10
AKR1C1	1645	aldo-keto reductase family 1 member C1
C9	1645	aldo-keto reductase family 1 member C1
AKR1C2	1646	aldo-keto reductase family 1 member C2
AKR1C3	8644	aldo-keto reductase family 1 member C3
AKR1C4	1109	aldo-keto reductase family 1 member C4
AKR1D1	6718	aldo-keto reductase family 1 member D1
AKR7A2	8574	aldo-keto reductase family 7 member A2
AKR7A3	22977	aldo-keto reductase family 7 member A3
AKT1	207	AKT serine/threonine kinase 1
AKT1S1	84335	AKT1 substrate 1
AKT2	208	AKT serine/threonine kinase 2
AKT3	10000	AKT serine/threonine kinase 3
AKTIP	64400	AKT interacting protein
ALAD	210	aminolevulinate dehydratase
ALAS1	211	5'-aminolevulinate synthase 1
ALCAM	214	activated leukocyte cell adhesion molecule
ALDH16A1	126133	aldehyde dehydrogenase 16 family member A1
ALDH18A1	5832	aldehyde dehydrogenase 18 family member A1
ALDH1A1	216	aldehyde dehydrogenase 1 family member A1
ALDH1A2	8854	aldehyde dehydrogenase 1 family member A2
ALDH1A3	220	aldehyde dehydrogenase 1 family member A3
ALDH1B1	219	aldehyde dehydrogenase 1 family member B1
ALDH1L1	10840	aldehyde dehydrogenase 1 family member L1
ALDH1L2	160428	aldehyde dehydrogenase 1 family member L2
ALDH2	217	aldehyde dehydrogenase 2 family member
ALDH3A1	218	aldehyde dehydrogenase 3 family member A1
ALDH3A2	224	aldehyde dehydrogenase 3 family member A2
ALDH3B1	221	aldehyde dehydrogenase 3 family member B1
ALDH4A1	8659	aldehyde dehydrogenase 4 family member A1
ALDH5A1	7915	aldehyde dehydrogenase 5 family member A1
ALDH6A1	4329	aldehyde dehydrogenase 6 family member A1
ALDH7A1	501	aldehyde dehydrogenase 7 family member A1
ALDH8A1	64577	aldehyde dehydrogenase 8 family member A1
ALDH9A1	223	aldehyde dehydrogenase 9 family member A1
ALDOA	226	aldolase, fructose-bisphosphate A
ALDOB	229	aldolase, fructose-bisphosphate B
ALDOC	230	aldolase, fructose-bisphosphate C
ALG1	56052	ALG1 chitobiosyldiphosphodolichol beta-mannosyltransferase
ALG10	84920	ALG10 alpha-1,2-glucosyltransferase
ALG11	440138	ALG11 alpha-1,2-mannosyltransferase
ALG12	79087	ALG12 alpha-1,6-mannosyltransferase
ALG13	79868	ALG13 UDP-N-acetylglucosaminyltransferase subunit
ALG14	199857	ALG14 UDP-N-acetylglucosaminyltransferase subunit
ALG3	10195	ALG3 alpha-1,3- mannosyltransferase
ALG5	29880	ALG5 dolichyl-phosphate beta-glucosyltransferase
ALG6	29929	ALG6 alpha-1,3-glucosyltransferase
ALG8	79053	ALG8 alpha-1,3-glucosyltransferase
ALG9	79796	ALG9 alpha-1,2-mannosyltransferase
ALK	238	ALK receptor tyrosine kinase
ALKBH1	8846	alkB homolog 1, histone H2A dioxygenase
ALKBH3	221120	alkB homolog 3, alpha-ketoglutarate dependent dioxygenase
ALKBH4	54784	alkB homolog 4, lysine demethylase
ALKBH5	54890	alkB homolog 5, RNA demethylase
ALKBH7	84266	alkB homolog 7
ALKBH8	91801	alkB homolog 8, tRNA methyltransferase
ALOX12	239	arachidonate 12-lipoxygenase, 12S type
ALOX15	246	arachidonate 15-lipoxygenase
ALOX15B	247	arachidonate 15-lipoxygenase type B
ALOX5	240	arachidonate 5-lipoxygenase
ALOX5AP	241	arachidonate 5-lipoxygenase activating protein
ALPPL2	251	alkaline phosphatase, germ cell
ALPK1	80216	alpha kinase 1
ALPK3	57538	alpha kinase 3
ALPL	249	alkaline phosphatase, biomineralization associated
ALPP	250	alkaline phosphatase, placental
ALS2	57679	alsin Rho guanine nucleotide exchange factor ALS2
ALS2CL	259173	ALS2 C-terminal like
ALYREF	10189	Aly/REF export factor
AMACR	23600	alpha-methylacyl-CoA racemase
AMBP	259	alpha-1-microglobulin/bikunin precursor
AMBRA1	55626	autophagy and beclin 1 regulator 1
AMDHD2	51005	amidohydrolase domain containing 2
AMER1	139285	APC membrane recruitment protein 1
AMFR	267	autocrine motility factor receptor
AMIGO2	347902	adhesion molecule with Ig like domain 2
AMMECR1	9949	AMMECR nuclear protein 1
AMN1	196394	antagonist of mitotic exit network 1 homolog
AMOT	154796	angiomotin
AMOTL1	154810	angiomotin like 1
AMOTL2	51421	angiomotin like 2
AMPD2	271	adenosine monophosphate deaminase 2
AMPD3	272	adenosine monophosphate deaminase 3
AMPH	273	amphiphysin
AMT	275	aminomethyltransferase
AMY1A	276	amylase alpha 1A
AMY2A	279	amylase alpha 2A
AMZ2	51321	archaelysin family metallopeptidase 2
ANAPC1	64682	anaphase promoting complex subunit 1
ANAPC10	10393	anaphase promoting complex subunit 10
ANAPC13	25847	anaphase promoting complex subunit 13
ANAPC16	119504	anaphase promoting complex subunit 16
ANAPC2	29882	anaphase promoting complex subunit 2
ANAPC4	29945	anaphase promoting complex subunit 4
ANAPC5	51433	anaphase promoting complex subunit 5
ANAPC7	51434	anaphase promoting complex subunit 7
ANG	283	angiogenin
RNASE4	283	angiogenin
ANGEL1	23357	angel homolog 1
ANGEL2	90806	angel homolog 2
ANGPT1	284	angiopoietin 1
ANGPT2	285	angiopoietin 2
ANGPTL1	9068	angiopoietin like 1
ANGPTL2	23452	angiopoietin like 2
ANGPTL4	51129	angiopoietin like 4
ANGPTL6	83854	angiopoietin like 6
ANK1	286	ankyrin 1
ANK2	287	ankyrin 2
ANK3	288	ankyrin 3
ANKFY1	51479	ankyrin repeat and FYVE domain containing 1
ANKH	56172	ANKH inorganic pyrophosphate transport regulator
ANKHD1	54882	ankyrin repeat and KH domain containing 1
ANKIB1	54467	ankyrin repeat and IBR domain containing 1
ANKLE2	23141	ankyrin repeat and LEM domain containing 2
ANKMY2	57037	ankyrin repeat and MYND domain containing 2
ANKRD10	55608	ankyrin repeat domain 10
ANKRD11	29123	ankyrin repeat domain containing 11
ANKRD12	23253	ankyrin repeat domain 12
ANKRD13A	88455	ankyrin repeat domain 13A
ANKRD13D	338692	ankyrin repeat domain 13D
ANKRD16	54522	ankyrin repeat domain 16
ANKRD17	26057	ankyrin repeat domain 17
ANKRD22	118932	ankyrin repeat domain 22
ANKRD27	84079	ankyrin repeat domain 27
ANKRD28	23243	ankyrin repeat domain 28
ANKRD35	148741	ankyrin repeat domain 35
ANKRD36	375248	ankyrin repeat domain 36
ANKRD39	51239	ankyrin repeat domain 39
ANKRD40	91369	ankyrin repeat domain 40
ANKRD44	91526	ankyrin repeat domain 44
ANKRD46	157567	ankyrin repeat domain 46
ANKRD49	54851	ankyrin repeat domain 49
ANKRD50	57182	ankyrin repeat domain containing 50
ANKRD52	283373	ankyrin repeat domain 52
ANKRD54	129138	ankyrin repeat domain 54
ANKRD65	441869	ankyrin repeat domain 65
ANKS1A	23294	ankyrin repeat and sterile alpha motif domain containing 1A
AIDA	56899	ankyrin repeat and sterile alpha motif domain containing 1B
ANKS6	203286	ankyrin repeat and sterile alpha motif domain containing 6
ANKZF1	55139	ankyrin repeat and zinc finger peptidyl tRNA hydrolase 1
ANLN	54443	anillin, actin binding protein
ANO1	55107	anoctamin 1
ANO10	55129	anoctamin 10
ANO6	196527	anoctamin 6
ANO8	57719	anoctamin 8
ANO9	338440	anoctamin 9
KAL1	3730	anosmin 1
ANP32A	8125	acidic nuclear phosphoprotein 32 family member A
ANP32B	10541	acidic nuclear phosphoprotein 32 family member B
ANP32E	81611	acidic nuclear phosphoprotein 32 family member E
ANPEP	290	alanyl aminopeptidase, membrane
FAM173A	65990	adenine nucleotide translocase lysine methyltransferase
ANTXR1	84168	ANTXR cell adhesion molecule 1
ANTXR2	118429	ANTXR cell adhesion molecule 2
ANXA1	301	annexin A1
ANXA10	11199	annexin A10
ANXA11	311	annexin A11
ANXA13	312	annexin A13
ANXA2	302	annexin A2
ANXA3	306	annexin A3
ANXA4	307	annexin A4
ANXA5	308	annexin A5
ANXA6	309	annexin A6
ANXA7	310	annexin A7
ANXA8	653145	annexin A8
ANXA8L2	728113	annexin A8 like 1
ANXA9	8416	annexin A9
AOAH	313	acyloxyacyl hydrolase
AOC1	26	amine oxidase copper containing 1
AOC3	8639	amine oxidase copper containing 3
AOX1	316	aldehyde oxidase 1
AP1B1	162	adaptor related protein complex 1 subunit beta 1
AP1G1	164	adaptor related protein complex 1 subunit gamma 1
AP1G2	8906	adaptor related protein complex 1 subunit gamma 2
AP1M1	8907	adaptor related protein complex 1 subunit mu 1
AP1M2	10053	adaptor related protein complex 1 subunit mu 2
AP1S1	1174	adaptor related protein complex 1 subunit sigma 1
AP1S2	8905	adaptor related protein complex 1 subunit sigma 2
AP1S3	130340	adaptor related protein complex 1 subunit sigma 3
AP2A1	160	adaptor related protein complex 2 subunit alpha 1
AP2A2	161	adaptor related protein complex 2 subunit alpha 2
AP2B1	163	adaptor related protein complex 2 subunit beta 1
AP2M1	1173	adaptor related protein complex 2 subunit mu 1
AP2S1	1175	adaptor related protein complex 2 subunit sigma 1
AP3B1	8546	adaptor related protein complex 3 subunit beta 1
AP3B2	8120	adaptor related protein complex 3 subunit beta 2
AP3D1	8943	adaptor related protein complex 3 subunit delta 1
AP3M1	26985	adaptor related protein complex 3 subunit mu 1
AP3M2	10947	adaptor related protein complex 3 subunit mu 2
AP3S1	1176	adaptor related protein complex 3 subunit sigma 1
AP3S2	10239	adaptor related protein complex 3 subunit sigma 2
AP4B1	10717	adaptor related protein complex 4 subunit beta 1
AP4E1	23431	adaptor related protein complex 4 subunit epsilon 1
AP4M1	9179	adaptor related protein complex 4 subunit mu 1
AP4S1	11154	adaptor related protein complex 4 subunit sigma 1
AP5B1	91056	adaptor related protein complex 5 subunit beta 1
AP5M1	55745	adaptor related protein complex 5 subunit mu 1
AP5S1	55317	adaptor related protein complex 5 subunit sigma 1
AP5Z1	9907	adaptor related protein complex 5 subunit zeta 1
APAF1	317	apoptotic peptidase activating factor 1
APBA1	320	amyloid beta precursor protein binding family A member 1
APBA2	321	amyloid beta precursor protein binding family A member 2
APBA3	9546	amyloid beta precursor protein binding family A member 3
APBB1	322	amyloid beta precursor protein binding family B member 1
APBB1IP	54518	amyloid beta precursor protein binding family B member 1 interacting protein
APBB2	323	amyloid beta precursor protein binding family B member 2
APCDD1L	164284	APC down-regulated 1 like
APCS	325	amyloid P component, serum
APEH	327	acylaminoacyl-peptide hydrolase
APEX1	328	apurinic/apyrimidinic endodeoxyribonuclease 1
APH1A	51107	aph-1 homolog A, gamma-secretase subunit
APH1B	83464	aph-1 homolog B, gamma-secretase subunit
API5	8539	apoptosis inhibitor 5
APIP	51074	APAF1 interacting protein
APLNR	187	apelin receptor
APLP2	334	amyloid beta precursor like protein 2
APPL2	334	amyloid beta precursor like protein 2
APMAP	57136	adipocyte plasma membrane associated protein
APOA1	335	apolipoprotein A1
APOA2	336	apolipoprotein A2
APOA4	337	apolipoprotein A4
APOA5	116519	apolipoprotein A5
APOB	338	apolipoprotein B
APOBEC3B	9582	apolipoprotein B mRNA editing enzyme catalytic subunit 3B
APOBEC3C	27350	apolipoprotein B mRNA editing enzyme catalytic subunit 3C
APOBEC3D	140564	apolipoprotein B mRNA editing enzyme catalytic subunit 3D
APOBEC3F	200316	apolipoprotein B mRNA editing enzyme catalytic subunit 3F
APOBEC3G	60489	apolipoprotein B mRNA editing enzyme catalytic subunit 3G
APOBR	55911	apolipoprotein B receptor
APOC1	341	apolipoprotein C1
APOC2	344	apolipoprotein C2
APOC3	345	apolipoprotein C3
APOC4	100533990	APOC4-APOC2 readthrough (NMD candidate)
APOD	347	apolipoprotein D
APOE	348	apolipoprotein E
APOF	319	apolipoprotein F
APOH	350	apolipoprotein H
APOL1	8542	apolipoprotein L1
APOL2	23780	apolipoprotein L2
APOL3	80833	apolipoprotein L3
APOL6	80830	apolipoprotein L6
APOM	55937	apolipoprotein M
APOO	79135	apolipoprotein O
APOOL	139322	apolipoprotein O like
APP	351	amyloid beta precursor protein
APPBP2	10513	amyloid beta precursor protein binding protein 2
APPL1	26060	adaptor protein, phosphotyrosine interacting with PH domain and leucine zipper 1
APRT	353	adenine phosphoribosyltransferase
APTX	54840	aprataxin
AQP4	361	aquaporin 4
AQR	9716	aquarius intron-binding spliceosomal factor
ARAF	369	A-Raf proto-oncogene, serine/threonine kinase
ARAP1	116985	ArfGAP with RhoGAP domain, ankyrin repeat and PH domain 1
ARAP2	116984	ArfGAP with RhoGAP domain, ankyrin repeat and PH domain 2
ARAP3	64411	ArfGAP with RhoGAP domain, ankyrin repeat and PH domain 3
ARCN1	372	archain 1
AREG	374	amphiregulin
ARF1	375	ADP ribosylation factor 1
ARF4	378	ADP ribosylation factor 4
ARF5	381	ADP ribosylation factor 5
ARF6	382	ADP ribosylation factor 6
ARFGAP2	84364	ADP ribosylation factor GTPase activating protein 2
ARFGAP1	26286	ADP ribosylation factor GTPase activating protein 3
ARFGAP3	26286	ADP ribosylation factor GTPase activating protein 3
ARFGEF1	10565	ADP ribosylation factor guanine nucleotide exchange factor 1
ARFGEF2	10564	ADP ribosylation factor guanine nucleotide exchange factor 2
ARFGEF3	57221	ARFGEF family member 3
ARFIP1	27236	ADP ribosylation factor interacting protein 1
ARFIP2	23647	ADP ribosylation factor interacting protein 2
ARFRP1	10139	ADP ribosylation factor related protein 1
ARG2	384	arginase 2
ARGLU1	55082	arginine and glutamate rich 1
ARHGAP1	392	Rho GTPase activating protein 1
ARHGAP12	94134	Rho GTPase activating protein 12
ARHGAP15	55843	Rho GTPase activating protein 15
ARHGAP17	55114	Rho GTPase activating protein 17
ARHGAP18	93663	Rho GTPase activating protein 18
ARHGAP10	57584	Rho GTPase activating protein 21
ARHGAP21	57584	Rho GTPase activating protein 21
ARHGAP23	57636	Rho GTPase activating protein 23
ARHGAP24	83478	Rho GTPase activating protein 24
ARHGAP25	9938	Rho GTPase activating protein 25
ARHGAP26	23092	Rho GTPase activating protein 26
ARHGAP27	201176	Rho GTPase activating protein 27
ARHGAP28	79822	Rho GTPase activating protein 28
ARHGAP29	9411	Rho GTPase activating protein 29
ARHGAP30	257106	Rho GTPase activating protein 30
ARHGAP31	57514	Rho GTPase activating protein 31
ARHGAP32	9743	Rho GTPase activating protein 32
ARHGAP35	2909	Rho GTPase activating protein 35
ARHGAP4	393	Rho GTPase activating protein 4
ARHGAP42	143872	Rho GTPase activating protein 42
ARHGAP44	9912	Rho GTPase activating protein 44
HMHA1	23526	Rho GTPase activating protein 45
ARHGAP5	394	Rho GTPase activating protein 5
ARHGAP6	395	Rho GTPase activating protein 6
ARHGAP8	23779	Rho GTPase activating protein 8
ARHGAP9	64333	Rho GTPase activating protein 9
RGL1	64333	Rho GTPase activating protein 9
ARHGDIA	396	Rho GDP dissociation inhibitor alpha
ARHGDIB	397	Rho GDP dissociation inhibitor beta
ARHGEF1	9138	Rho guanine nucleotide exchange factor 1
ARHGEF10	9639	Rho guanine nucleotide exchange factor 10
ARHGEF10L	55160	Rho guanine nucleotide exchange factor 10 like
ARHGEF11	9826	Rho guanine nucleotide exchange factor 11
ARHGEF12	23365	Rho guanine nucleotide exchange factor 12
ARHGEF15	22899	Rho guanine nucleotide exchange factor 15
ARHGEF16	27237	Rho guanine nucleotide exchange factor 16
ARHGEF17	9828	Rho guanine nucleotide exchange factor 17
ARHGEF18	23370	Rho/Rac guanine nucleotide exchange factor 18
ARHGEF19	128272	Rho guanine nucleotide exchange factor 19
ARHGEF2	9181	Rho/Rac guanine nucleotide exchange factor 2
ARHGEF26	26084	Rho guanine nucleotide exchange factor 26
ARHGEF28	64283	Rho guanine nucleotide exchange factor 28
ARHGEF3	50650	Rho guanine nucleotide exchange factor 3
ARHGEF35	445328	Rho guanine nucleotide exchange factor 35
ARHGEF37	389337	Rho guanine nucleotide exchange factor 37
ARHGEF38	54848	Rho guanine nucleotide exchange factor 38
ARHGEF40	55701	Rho guanine nucleotide exchange factor 40
ARHGEF5	7984	Rho guanine nucleotide exchange factor 5
ARHGEF6	9459	Rac/Cdc42 guanine nucleotide exchange factor 6
ARHGEF7	8874	Rho guanine nucleotide exchange factor 7
ARID1A	8289	AT-rich interaction domain 1A
ARID1B	57492	AT-rich interaction domain 1B
ARID2	196528	AT-rich interaction domain 2
ARID3A	1820	AT-rich interaction domain 3A
ARID4A	5926	AT-rich interaction domain 4A
RBP1	5926	AT-rich interaction domain 4A
ARID4B	51742	AT-rich interaction domain 4B
ARID5B	84159	AT-rich interaction domain 5B
ARIH1	25820	ariadne RBR E3 ubiquitin protein ligase 1
ARIH2	10425	ariadne RBR E3 ubiquitin protein ligase 2
ARL10	285598	ADP ribosylation factor like GTPase 10
ARL11	115761	ADP ribosylation factor like GTPase 11
ARL13B	200894	ADP ribosylation factor like GTPase 13B
ARL14EP	120534	ADP ribosylation factor like GTPase 14 effector protein
ARL15	54622	ADP ribosylation factor like GTPase 15
ARL2	402	ADP ribosylation factor like GTPase 2
ARL2BP	23568	ADP ribosylation factor like GTPase 2 binding protein
ARL3	403	ADP ribosylation factor like GTPase 3
ARL4C	10123	ADP ribosylation factor like GTPase 4C
ARL5A	26225	ADP ribosylation factor like GTPase 5A
ARL5B	221079	ADP ribosylation factor like GTPase 5B
ARL6	84100	ADP ribosylation factor like GTPase 6
ARL6IP1	23204	ADP ribosylation factor like GTPase 6 interacting protein 1
ARL6IP4	51329	ADP ribosylation factor like GTPase 6 interacting protein 4
ARL6IP5	10550	ADP ribosylation factor like GTPase 6 interacting protein 5
ARL6IP6	151188	ADP ribosylation factor like GTPase 6 interacting protein 6
ARL8A	127829	ADP ribosylation factor like GTPase 8A
ARL8B	55207	ADP ribosylation factor like GTPase 8B
ARMC1	55156	armadillo repeat containing 1
ARMC10	83787	armadillo repeat containing 10
ARMC5	79798	armadillo repeat containing 5
ARMC6	93436	armadillo repeat containing 6
ARMC7	79637	armadillo repeat containing 7
ARMC8	25852	armadillo repeat containing 8
ARMC9	80210	armadillo repeat containing 9
ARMCX1	51309	armadillo repeat containing X-linked 1
ARMCX2	9823	armadillo repeat containing X-linked 2
ARMCX3	51566	armadillo repeat containing X-linked 3
ARMCX6	54470	armadillo repeat containing X-linked 6
C10ORF76	79591	armadillo like helical domain containing 3
ARMT1	79624	acidic residue methyltransferase 1
ARPC1A	10552	actin related protein 2/3 complex subunit 1A
ARPC1B	10095	actin related protein 2/3 complex subunit 1B
ARPC2	10109	actin related protein 2/3 complex subunit 2
ARPC3	10094	actin related protein 2/3 complex subunit 3
ARPC4	100526693	ARPC4-TTLL3 readthrough
ARPC5	10092	actin related protein 2/3 complex subunit 5
ARPC5L	81873	actin related protein 2/3 complex subunit 5 like
ARPIN	100526783	ARPIN-AP3S2 readthrough
ARPP19	10776	cAMP regulated phosphoprotein 19
ARRB1	408	arrestin beta 1
ARRB2	409	arrestin beta 2
ARRDC1	92714	arrestin domain containing 1
ARSA	410	arylsulfatase A
ARSD	414	arylsulfatase D
ARSI	340075	arylsulfatase family member I
ARSE	415	arylsulfatase L
ART4	420	ADP-ribosyltransferase 4 (inactive) (Dombrock blood group)
DOK1	420	ADP-ribosyltransferase 4 (inactive) (Dombrock blood group)
NBN	9048	artemin
ARV1	64801	ARV1 homolog, fatty acid homeostasis modulator
ARVCF	421	ARVCF delta catenin family member
AS3MT	57412	arsenite methyltransferase
ASAH1	427	N-acylsphingosine amidohydrolase 1
ASAP1	50807	ArfGAP with SH3 domain, ankyrin repeat and PH domain 1
ASAP2	8853	ArfGAP with SH3 domain, ankyrin repeat and PH domain 2
ASAP3	55616	ArfGAP with SH3 domain, ankyrin repeat and PH domain 3
ASB1	51665	ankyrin repeat and SOCS box containing 1
ASB6	140459	ankyrin repeat and SOCS box containing 6
ASB9	140462	ankyrin repeat and SOCS box containing 9
ASCC1	51008	activating signal cointegrator 1 complex subunit 1
ASCC2	84164	activating signal cointegrator 1 complex subunit 2
ASCC3	10973	activating signal cointegrator 1 complex subunit 3
ASNSD1	110599588	ASNSD1 upstream open reading frame
ASF1A	25842	anti-silencing function 1A histone chaperone
ASF1B	55723	anti-silencing function 1B histone chaperone
ASH2L	9070	ASH2 like, histone lysine methyltransferase complex subunit
ASMTL	8623	acetylserotonin O-methyltransferase like
ASNS	440	asparagine synthetase (glutamine-hydrolyzing)
ASPA	443	aspartoacylase
ASPDH	554235	aspartate dehydrogenase domain containing
ASPH	444	aspartate beta-hydroxylase
ASPHD1	253982	aspartate beta-hydroxylase domain containing 1
ASPM	259266	assembly factor for spindle microtubules
ASPN	54829	asporin
ASPSCR1	79058	ASPSCR1 tether for SLC2A4, UBX domain containing
ASRGL1	80150	asparaginase and isoaspartyl peptidase 1
ASS1	445	argininosuccinate synthase 1
ATAD1	84896	ATPase family AAA domain containing 1
ATAD2	29028	ATPase family AAA domain containing 2
ATAD2B	54454	ATPase family AAA domain containing 2B
ATAD3A	55210	ATPase family AAA domain containing 3A
ATAD3B	83858	ATPase family AAA domain containing 3B
ATAT1	79969	alpha tubulin acetyltransferase 1
ATE1	11101	arginyltransferase 1
ATF6	22926	activating transcription factor 6
ATF6B	1388	activating transcription factor 6 beta
ATF7	11016	activating transcription factor 7
ATF7IP	55729	activating transcription factor 7 interacting protein
ATG101	60673	autophagy related 101
ATG13	9776	autophagy related 13
ATG14	22863	autophagy related 14
ATG16L1	55054	autophagy related 16 like 1
ATG2A	23130	autophagy related 2A
ATG2B	55102	autophagy related 2B
ATG3	64422	autophagy related 3
ATG4A	115201	autophagy related 4A cysteine peptidase
ATG4B	23192	autophagy related 4B cysteine peptidase
ATG4C	84938	autophagy related 4C cysteine peptidase
ATG5	9474	autophagy related 5
ATG7	10533	autophagy related 7
ATG9A	79065	autophagy related 9A
ATIC	471	5-aminoimidazole-4-carboxamide ribonucleotide formyltransferase/IMP cyclohydrolase
ATL2	64225	atlastin GTPase 2
ATL3	25923	atlastin GTPase 3
ATM	472	ATM serine/threonine kinase
ATMIN	23300	ATM interactor
ATN1	1822	atrophin 1
ATOX1	475	antioxidant 1 copper chaperone
ATP10B	23120	ATPase phospholipid transporting 10B (putative)
ATP11A	23250	ATPase phospholipid transporting 11A
ATP11B	23200	ATPase phospholipid transporting 11B (putative)
ATP11C	286410	ATPase phospholipid transporting 11C
ATP12A	479	ATPase H+/K+ transporting non-gastric alpha2 subunit
ATP13A1	57130	ATPase 13A1
ATP13A2	23400	ATPase cation transporting 13A2
ATP13A3	79572	ATPase 13A3
ATP13A4	84239	ATPase 13A4
ATP1A2	477	ATPase Na+/K+ transporting subunit alpha 2
ATP1A1	478	ATPase Na+/K+ transporting subunit alpha 3
ATP1A3	478	ATPase Na+/K+ transporting subunit alpha 3
ATP1B1	481	ATPase Na+/K+ transporting subunit beta 1
ATP1B2	482	ATPase Na+/K+ transporting subunit beta 2
ATP1B3	483	ATPase Na+/K+ transporting subunit beta 3
XRCC6BP1	91419	ATP23 metallopeptidase and ATP synthase assembly factor homolog
ATP2A1	487	ATPase sarcoplasmic/endoplasmic reticulum Ca2+ transporting 1
ATP2A2	488	ATPase sarcoplasmic/endoplasmic reticulum Ca2+ transporting 2
ATP2A3	489	ATPase sarcoplasmic/endoplasmic reticulum Ca2+ transporting 3
ATP2B1	490	ATPase plasma membrane Ca2+ transporting 1
ATP2B4	493	ATPase plasma membrane Ca2+ transporting 4
ATP2C1	27032	ATPase secretory pathway Ca2+ transporting 1
ATP2C2	9914	ATPase secretory pathway Ca2+ transporting 2
ATP5A1	498	ATP synthase F1 subunit alpha
ATP5B	506	ATP synthase F1 subunit beta
ATP5C1	509	ATP synthase F1 subunit gamma
ATP5D	513	ATP synthase F1 subunit delta
ATPIF1	93974	ATP synthase inhibitory factor subunit 1
ATP5I	521	ATP synthase membrane subunit e
ATP5J2	9551	ATP synthase membrane subunit f
ATP5L	10632	ATP synthase membrane subunit g
USMG5	84833	ATP synthase membrane subunit k
ATP5F1	515	ATP synthase peripheral stalk-membrane subunit b
ATP5H	10476	ATP synthase peripheral stalk subunit d
ATP5J	522	ATP synthase peripheral stalk subunit F6
ATP5O	539	ATP synthase peripheral stalk subunit OSCP
ATP6AP1	537	ATPase H+ transporting accessory protein 1
ATP6AP2	10159	ATPase H+ transporting accessory protein 2
ATP6V0A1	535	ATPase H+ transporting V0 subunit a1
ATP6V0A2	23545	ATPase H+ transporting V0 subunit a2
ATP6V0A4	50617	ATPase H+ transporting V0 subunit a4
ATP6V0C	527	ATPase H+ transporting V0 subunit c
ATP6V0D1	9114	ATPase H+ transporting V0 subunit d1
ATP6V0D2	245972	ATPase H+ transporting V0 subunit d2
VMA21	8992	ATPase H+ transporting V0 subunit e1
ATP6V1A	523	ATPase H+ transporting V1 subunit A
ATP6V1B1	525	ATPase H+ transporting V1 subunit B1
ATP6V1B2	526	ATPase H+ transporting V1 subunit B2
ATP6V1C1	528	ATPase H+ transporting V1 subunit C1
ATP6V1C2	245973	ATPase H+ transporting V1 subunit C2
ATP6V1D	51382	ATPase H+ transporting V1 subunit D
ATP6V1E1	529	ATPase H+ transporting V1 subunit E1
ATP6V1F	9296	ATPase H+ transporting V1 subunit F
ATP6V1G1	9550	ATPase H+ transporting V1 subunit G1
ATP6V1H	51606	ATPase H+ transporting V1 subunit H
ATP7A	538	ATPase copper transporting alpha
ATP7B	540	ATPase copper transporting beta
ATP8A1	10396	ATPase phospholipid transporting 8A1
ATP8B1	5205	ATPase phospholipid transporting 8B1
ATP8B2	57198	ATPase phospholipid transporting 8B2
ATP8B4	79895	ATPase phospholipid transporting 8B4 (putative)
ATP9A	10079	ATPase phospholipid transporting 9A (putative)
ATP9B	374868	ATPase phospholipid transporting 9B (putative)
ATPAF1	64756	ATP synthase mitochondrial F1 complex assembly factor 1
ATPAF2	91647	ATP synthase mitochondrial F1 complex assembly factor 2
ATRIP	84126	ATR interacting protein
ATRN	8455	attractin
ATRX	546	ATRX chromatin remodeler
ATXN1	6310	ataxin 1
ATXN10	25814	ataxin 10
ATXN1L	342371	ataxin 1 like
ATXN2	6311	ataxin 2
ATXN2L	11273	ataxin 2 like
ATXN3	4287	ataxin 3
ATXN7	6314	ataxin 7
ATXN7L3B	552889	ataxin 7 like 3B
AUH	549	AU RNA binding methylglutaconyl-CoA hydratase
AUP1	550	AUP1 lipid droplet regulating VLDL assembly factor
AURKA	6790	aurora kinase A
AIP	54998	aurora kinase A interacting protein 1
AURKAIP1	54998	aurora kinase A interacting protein 1
AIM1	9212	aurora kinase B
AURKB	9212	aurora kinase B
AUTS2	26053	activator of transcription and developmental regulator AUTS2
AVEN	57099	apoptosis and caspase activation inhibitor
AVIL	10677	advillin
AVL9	23080	AVL9 cell migration associated
AXIN1	8312	axin 1
AXL	558	AXL receptor tyrosine kinase
AZGP1	563	alpha-2-glycoprotein 1, zinc-binding
AZI2	113451	antizyme inhibitor 2
AZU1	566	azurocidin 1
B2M	567	beta-2-microglobulin
B3GALNT1	8706	beta-1,3-N-acetylgalactosaminyltransferase 1 (globoside blood group)
B3GALT6	126792	beta-1,3-galactosyltransferase 6
B3GAT3	26229	beta-1,3-glucuronyltransferase 3
B3GALTL	145173	beta 3-glucosyltransferase
B3GNT2	10678	UDP-GlcNAc:betaGal beta-1,3-N-acetylglucosaminyltransferase 2
B3GNT3	10331	UDP-GlcNAc:betaGal beta-1,3-N-acetylglucosaminyltransferase 3
B3GNT5	84002	UDP-GlcNAc:betaGal beta-1,3-N-acetylglucosaminyltransferase 5
B3GNT7	93010	UDP-GlcNAc:betaGal beta-1,3-N-acetylglucosaminyltransferase 7
B3GNT9	84752	UDP-GlcNAc:betaGal beta-1,3-N-acetylglucosaminyltransferase 9
B3GNT8	146712	UDP-GlcNAc:betaGal beta-1,3-N-acetylglucosaminyltransferase like 1
B4GALNT3	283358	beta-1,4-N-acetyl-galactosaminyltransferase 3
B4GALT1	2683	beta-1,4-galactosyltransferase 1
B4GALT3	8703	beta-1,4-galactosyltransferase 3
B4GALT4	8702	beta-1,4-galactosyltransferase 4
B4GALT5	9334	beta-1,4-galactosyltransferase 5
B4GALT7	11285	beta-1,4-galactosyltransferase 7
B3GNT6	11041	beta-1,4-glucuronyltransferase 1
B4GAT1	11041	beta-1,4-glucuronyltransferase 1
B9D2	80776	B9 domain containing 2
BABAM1	29086	BRISC and BRCA1 A complex member 1
BRE	9577	BRISC and BRCA1 A complex member 2
BACE2	25825	beta-secretase 2
BAD	572	BCL2 associated agonist of cell death
BAG1	573	BAG cochaperone 1
BAG2	9532	BAG cochaperone 2
BAG3	9531	BAG cochaperone 3
BAG4	9530	BAG cochaperone 4
BAG5	9529	BAG cochaperone 5
BAG6	7917	BAG cochaperone 6
BAHD1	22893	bromo adjacent homology domain containing 1
BAIAP2	10458	BAR/IMD domain containing adaptor protein 2
BAIAP2L1	55971	BAR/IMD domain containing adaptor protein 2 like 1
BAIAP2L2	80115	BAR/IMD domain containing adaptor protein 2 like 2
BAK1	578	BCL2 antagonist/killer 1
BANF1	8815	BAF nuclear assembly factor 1
BANK1	55024	B cell scaffold protein with ankyrin repeats 1
BANP	54971	BTG3 associated nuclear protein
BARD1	580	BRCA1 associated RING domain 1
BARX1	56033	BARX homeobox 1
BASP1	10409	brain abundant membrane attached signal protein 1
BAX	581	BCL2 associated X, apoptosis regulator
BAZ1A	11177	bromodomain adjacent to zinc finger domain 1A
BAZ1B	9031	bromodomain adjacent to zinc finger domain 1B
BAZ2A	11176	bromodomain adjacent to zinc finger domain 2A
BAZ2B	29994	bromodomain adjacent to zinc finger domain 2B
BBC3	27113	BCL2 binding component 3
C9ORF16	79095	bublin coiled coil protein
BBOX1	8424	gamma-butyrobetaine hydroxylase 1
BBS1	582	Bardet-Biedl syndrome 1
BBS2	583	Bardet-Biedl syndrome 2
BBS4	585	Bardet-Biedl syndrome 4
BBS5	129880	Bardet-Biedl syndrome 5
BBS7	55212	Bardet-Biedl syndrome 7
BBS9	27241	Bardet-Biedl syndrome 9
BBX	56987	BBX high mobility group box domain containing
BCAP29	55973	B cell receptor associated protein 29
BCAP31	10134	B cell receptor associated protein 31
BCAR1	9564	BCAR1 scaffold protein, Cas family member
BCAR3	8412	BCAR3 adaptor protein, NSP family member
BCAS1	8537	brain enriched myelin associated protein 1
BCAS2	10286	BCAS2 pre-mRNA processing factor
BCAS3	54828	BCAS3 microtubule associated cell migration factor
BCAT1	586	branched chain amino acid transaminase 1
BCAM	587	branched chain amino acid transaminase 2
BCAT2	587	branched chain amino acid transaminase 2
BCCIP	56647	BRCA2 and CDKN1A interacting protein
BCHE	590	butyrylcholinesterase
BCKDHA	593	branched chain keto acid dehydrogenase E1 subunit alpha
BCKDHB	594	branched chain keto acid dehydrogenase E1 subunit beta
BCKDK	10295	branched chain keto acid dehydrogenase kinase
BCL10	8915	BCL10 immune signaling adaptor
BCL11A	53335	BAF chromatin remodeling complex subunit BCL11A
ATL1	64919	BAF chromatin remodeling complex subunit BCL11B
BCL11B	64919	BAF chromatin remodeling complex subunit BCL11B
RIT1	64919	BAF chromatin remodeling complex subunit BCL11B
BCL2	596	BCL2 apoptosis regulator
BCL2L1	598	BCL2 like 1
BCL2L11	10018	BCL2 like 11
BCL2L12	83596	BCL2 like 12
BCL2L13	23786	BCL2 like 13
BCL2L15	440603	BCL2 like 15
BCL2L2	599	BCL2 like 2
BCL3	602	BCL3 transcription coactivator
BCL7A	605	BAF chromatin remodeling complex subunit BCL7A
BCL7B	9275	BAF chromatin remodeling complex subunit BCL7B
BCL7C	9274	BAF chromatin remodeling complex subunit BCL7C
BCL9	607	BCL9 transcription coactivator
BCL9L	283149	BCL9 like
BCLAF1	9774	BCL2 associated transcription factor 1
CXORF23	256643	BCLAF1 and THRAP3 family member 3
BCOR	54880	BCL6 corepressor
BCR	613	BCR activator of RhoGEF and GTPase
BCS1L	617	BCS1 homolog, ubiquinol-cytochrome c reductase complex chaperone
BDH1	622	3-hydroxybutyrate dehydrogenase 1
BDH2	56898	3-hydroxybutyrate dehydrogenase 2
BDKRB2	624	bradykinin receptor B2
BECN1	8678	beclin 1
BEND3	57673	BEN domain containing 3
BEND7	222389	BEN domain containing 7
BET1	10282	Bet1 golgi vesicular membrane trafficking protein
BET1L	51272	Bet1 golgi vesicular membrane trafficking protein like
BGN	633	biglycan
BHLHA15	168620	basic helix-loop-helix family member a15
BHLHE40	8553	basic helix-loop-helix family member e40
STRA13	8553	basic helix-loop-helix family member e40
BHLHE41	79365	basic helix-loop-helix family member e41
BHMT	635	betaine--homocysteine S-methyltransferase
BHMT2	23743	betaine--homocysteine S-methyltransferase 2
BICC1	80114	BicC family RNA binding protein 1
BICD1	636	BICD cargo adaptor 1
BICD2	23299	BICD cargo adaptor 2
CCDC64B	146439	BICD family like cargo adaptor 2
GLTSCR1	29998	BRD4 interacting chromatin remodeling complex associated protein
GLTSCR1L	23506	BICRA like chromatin remodeling complex associated protein
BID	637	BH3 interacting domain death agonist
BIN1	274	bridging integrator 1
BIN2	51411	bridging integrator 2
BIN3	55909	bridging integrator 3
BIRC2	329	baculoviral IAP repeat containing 2
BIRC6	57448	baculoviral IAP repeat containing 6
BIRC8	112401	baculoviral IAP repeat containing 8
BLM	641	BLM RecQ like helicase
BLMH	642	bleomycin hydrolase
BLNK	29760	B cell linker
BLOC1S1	2647	biogenesis of lysosomal organelles complex 1 subunit 1
BLOC1S2	282991	biogenesis of lysosomal organelles complex 1 subunit 2
BLOC1S3	388552	biogenesis of lysosomal organelles complex 1 subunit 3
BLOC1S4	55330	biogenesis of lysosomal organelles complex 1 subunit 4
BLOC1S5	63915	biogenesis of lysosomal organelles complex 1 subunit 5
BLOC1S6	26258	biogenesis of lysosomal organelles complex 1 subunit 6
KIAA1109	84162	bridge-like lipid transfer protein family member 1
KIAA0100	9703	bridge-like lipid transfer protein family member 2
UHRF1BP1	54887	bridge-like lipid transfer protein family member 3A
UHRF1BP1L	23074	bridge-like lipid transfer protein family member 3B
BLVRA	644	biliverdin reductase A
BLVRB	645	biliverdin reductase B
BLZF1	8548	basic leucine zipper nuclear factor 1
ARNTL	406	basic helix-loop-helix ARNT like 1
BMI1	648	BMI1 proto-oncogene, polycomb ring finger
BMP1	649	bone morphogenetic protein 1
BMP2	650	bone morphogenetic protein 2
BMP2K	55589	BMP2 inducible kinase
BMP3	651	bone morphogenetic protein 3
BMP5	653	bone morphogenetic protein 5
BMP8A	353500	bone morphogenetic protein 8a
BMPER	168667	BMP binding endothelial regulator
BMPR2	659	bone morphogenetic protein receptor type 2
BMS1	9790	BMS1 ribosome biogenesis factor
BMX	660	BMX non-receptor tyrosine kinase
BNIP1	662	BCL2 interacting protein 1
BNIP2	663	BCL2 interacting protein 2
BNIP3	664	BCL2 interacting protein 3
BNIP3L	665	BCL2 interacting protein 3 like
BOD1	91272	biorientation of chromosomes in cell division 1
BOD1L1	259282	biorientation of chromosomes in cell division 1 like 1
BOK	666	BCL2 family apoptosis regulator BOK
BOLA1	51027	bolA family member 1
BOLA2	552900	bolA family member 2
BOLA3	388962	bolA family member 3
BOP1	23246	BOP1 ribosomal biogenesis factor
LOH12CR1	118426	BLOC-1 related complex subunit 5
C17ORF59	54785	BLOC-1 related complex subunit 6
C10ORF32	119032	BLOC-1 related complex subunit 7
MEF2BNB	729991	BLOC-1 related complex subunit 8
BPGM	669	bisphosphoglycerate mutase
BPHL	670	biphenyl hydrolase like
BPI	671	bactericidal permeability increasing protein
BPIFA1	51297	BPI fold containing family A member 1
BPIFB1	92747	BPI fold containing family B member 1
BPIFB2	80341	BPI fold containing family B member 2
BPNT1	10380	3'(2'), 5'-bisphosphate nucleotidase 1
PIP	10380	3'(2'), 5'-bisphosphate nucleotidase 1
IMPAD1	54928	3'(2'), 5'-bisphosphate nucleotidase 2
BPTF	2186	bromodomain PHD finger transcription factor
BRAF	673	B-Raf proto-oncogene, serine/threonine kinase
BRAT1	221927	BRCA1 associated ATM activator 1
BRCA1	672	BRCA1 DNA repair associated
BRD1	23774	bromodomain containing 1
BRPF1	23774	bromodomain containing 1
BRD2	6046	bromodomain containing 2
BRD3	8019	bromodomain containing 3
BRD4	23476	bromodomain containing 4
BRD7	29117	bromodomain containing 7
BRD8	10902	bromodomain containing 8
SMAP2	10902	bromodomain containing 8
BRD9	65980	bromodomain containing 9
BRI3BP	140707	BRI3 binding protein
BACH1	83990	BRCA1 interacting helicase 1
BRIX1	55299	biogenesis of ribosomes BRX1
BRK1	55845	BRICK1 subunit of SCAR/WAVE actin nucleating complex
BRMS1	84312	BRMS1 like transcriptional repressor
BRMS1L	84312	BRMS1 like transcriptional repressor
BROX	148362	BRO1 domain and CAAX motif containing
BRPF3	27154	bromodomain and PHD finger containing 3
BSCL2	26580	BSCL2 lipid droplet biogenesis associated, seipin
BSDC1	55108	BSD domain containing 1
BSG	682	basigin (Ok blood group)
BSPRY	54836	B-box and SPRY domain containing
BST2	684	bone marrow stromal cell antigen 2
BTAF1	9044	B-TFIID TATA-box binding protein associated factor 1
BTBD1	53339	BTB domain containing 1
BTBD16	118663	BTB domain containing 16
BTBD2	55643	BTB domain containing 2
KIAA1107	284697	BTB domain containing 8
BTBD9	114781	BTB domain containing 9
BTC	685	betacellulin
BTF3L4	91408	basic transcription factor 3 like 4
BTK	695	Bruton tyrosine kinase
BTN2A1	11120	butyrophilin subfamily 2 member A1
BTN3A1	11119	butyrophilin subfamily 3 member A1
BTN3A2	11118	butyrophilin subfamily 3 member A2
BTF3	10384	butyrophilin subfamily 3 member A3
BTN3A3	10384	butyrophilin subfamily 3 member A3
BTNL9	153579	butyrophilin like 9
BUB1	699	BUB1 mitotic checkpoint serine/threonine kinase
BUB3	9184	BUB3 mitotic checkpoint protein
BUD13	84811	BUD13 homolog
WBSCR22	114049	BUD23 rRNA methyltransferase and ribosome maturation factor
BUD31	8896	BUD31 homolog
BYSL	705	bystin like
BZW1	9689	basic leucine zipper and W2 domains 1
BZW2	28969	basic leucine zipper and W2 domains 2
C10ORF55	414236	chromosome 10 putative open reading frame 55
C11ORF54	28970	chromosome 11 open reading frame 54
C11ORF68	83638	chromosome 11 open reading frame 68
C11ORF96	387763	chromosome 11 open reading frame 96
C11ORF98	102288414	chromosome 11 open reading frame 98
C12ORF29	91298	chromosome 12 open reading frame 29
C12ORF4	57102	chromosome 12 open reading frame 4
C12ORF43	64897	chromosome 12 open reading frame 43
C12ORF57	113246	chromosome 12 open reading frame 57
C12ORF73	728568	chromosome 12 open reading frame 73
OCC1	387882	chromosome 12 open reading frame 75
C14ORF119	55017	chromosome 14 open reading frame 119
C14ORF93	60686	chromosome 14 open reading frame 93
C15ORF39	56905	chromosome 15 open reading frame 39
NMES1	84419	chromosome 15 open reading frame 48
C16ORF54	283897	chromosome 16 open reading frame 54
C16ORF89	146556	chromosome 16 open reading frame 89
CCSMST1	283951	chromosome 16 open reading frame 91
C17ORF58	284018	chromosome 17 open reading frame 58
C17ORF75	64149	chromosome 17 open reading frame 75
C17ORF80	55028	chromosome 17 open reading frame 80
C18ORF25	147339	chromosome 18 open reading frame 25
C18ORF32	497661	chromosome 18 open reading frame 32
C19ORF25	148223	chromosome 19 open reading frame 25
IMUP	64073	chromosome 19 open reading frame 33
HIDE1	255809	chromosome 19 open reading frame 38
C19ORF47	126526	chromosome 19 open reading frame 47
C19ORF53	28974	chromosome 19 open reading frame 53
C19ORF54	284325	chromosome 19 open reading frame 54
LRP1	10438	C1D nuclear receptor corepressor
C1GALT1	56913	core 1 synthase, glycoprotein-N-acetylgalactosamine 3-beta-galactosyltransferase 1
C1GALT1C1	29071	C1GALT1 specific chaperone 1
C1QA	712	complement C1q A chain
C1QB	713	complement C1q B chain
C1QBP	708	complement C1q binding protein
C1QC	714	complement C1q C chain
C1QL3	389941	complement C1q like 3
C1QTNF2	114898	C1q and TNF related 2
C1QTNF3	114899	C1q and TNF related 3
C1QTNF5	114902	C1q and TNF related 5
C1QTNF6	114904	C1q and TNF related 6
C1QTNF7	114905	C1q and TNF related 7
C1R	715	complement C1r
C1RL	51279	complement C1r subcomponent like
C1S	716	complement C1s
C1ORF109	54955	chromosome 1 open reading frame 109
C1ORF112	55732	chromosome 1 open reading frame 112
SARG	79098	chromosome 1 open reading frame 116
C1ORF122	127687	chromosome 1 open reading frame 122
C1ORF162	128346	chromosome 1 open reading frame 162
C1ORF174	339448	chromosome 1 open reading frame 174
C1ORF198	84886	chromosome 1 open reading frame 198
C1ORF21	81563	chromosome 1 open reading frame 21
C1ORF210	149466	chromosome 1 open reading frame 210
C1ORF226	400793	chromosome 1 open reading frame 226
MMTAG2	79169	chromosome 1 open reading frame 35
C1ORF43	25912	chromosome 1 open reading frame 43
C1ORF50	79078	chromosome 1 open reading frame 50
C1ORF52	148423	chromosome 1 open reading frame 52
C1ORF53	388722	chromosome 1 open reading frame 53
C1ORF87	127795	chromosome 1 open reading frame 87
C20ORF27	54976	chromosome 20 open reading frame 27
C22ORF39	128977	chromosome 22 open reading frame 39
C2CD2	25966	C2 calcium dependent domain containing 2
C2CD2L	9854	C2CD2 like
C2CD3	26005	C2 domain containing 3 centriole elongation regulator
C2CD5	9847	C2 calcium dependent domain containing 5
C2ORF16	84226	chromosome 2 open reading frame 16
C2ORF49	79074	chromosome 2 open reading frame 49
C2ORF69	205327	chromosome 2 open reading frame 69
C2ORF76	130355	chromosome 2 open reading frame 76
C2ORF88	84281	chromosome 2 open reading frame 88
C3	718	complement C3
C3AR1	719	complement C3a receptor 1
C3ORF33	285315	chromosome 3 open reading frame 33
C3ORF38	285237	chromosome 3 open reading frame 38
TTMP	79669	chromosome 3 open reading frame 52
C4A	720	complement C4A (Rodgers blood group)
C4B	721	complement C4B (Chido blood group)
C4BPA	722	complement component 4 binding protein alpha
C4BPB	725	complement component 4 binding protein beta
C4ORF19	55286	chromosome 4 open reading frame 19
C4ORF3	401152	chromosome 4 open reading frame 3
C4ORF33	132321	chromosome 4 open reading frame 33
C5	727	complement C5
C5AR1	728	complement C5a receptor 1
KCT2	56951	chromosome 5 open reading frame 15
C5ORF22	55322	chromosome 5 open reading frame 22
C5ORF24	134553	chromosome 5 open reading frame 24
C6ORF120	387263	chromosome 6 open reading frame 120
C6ORF132	647024	chromosome 6 open reading frame 132
C6ORF136	221545	chromosome 6 open reading frame 136
C6ORF47	57827	chromosome 6 open reading frame 47
LEG1	352999	chromosome 6 open reading frame 58
BRAP	221477	chromosome 6 open reading frame 89
C6ORF89	221477	chromosome 6 open reading frame 89
C7ORF25	79020	chromosome 7 open reading frame 25
C7ORF50	84310	chromosome 7 open reading frame 50
C7ORF57	136288	chromosome 7 open reading frame 57
C8A	731	complement C8 alpha chain
C8B	732	complement C8 beta chain
C8G	733	complement C8 gamma chain
C8ORF33	65265	chromosome 8 open reading frame 33
C8ORF82	414919	chromosome 8 open reading frame 82
C9ORF40	55071	chromosome 9 open reading frame 40
C9ORF64	84267	chromosome 9 open reading frame 64
C9ORF72	203228	C9orf72-SMCR8 complex subunit
C9ORF78	51759	chromosome 9 open reading frame 78
CA1	759	carbonic anhydrase 1
CA12	771	carbonic anhydrase 12
CA13	377677	carbonic anhydrase 13
CA2	760	carbonic anhydrase 2
CA3	761	carbonic anhydrase 3
CA4	762	carbonic anhydrase 4
CA5B	11238	carbonic anhydrase 5B
CA8	767	carbonic anhydrase 8
CA9	768	carbonic anhydrase 9
CAAP1	79886	caspase activity and apoptosis inhibitor 1
CAB39	51719	calcium binding protein 39
CAB39L	81617	calcium binding protein 39 like
CABIN1	23523	calcineurin binding protein 1
CABLES1	91768	Cdk5 and Abl enzyme substrate 1
CACFD1	11094	calcium channel flower domain containing 1
CACHD1	57685	cache domain containing 1
CACNA2D1	781	calcium voltage-gated channel auxiliary subunit alpha2delta 1
CACNA2D2	9254	calcium voltage-gated channel auxiliary subunit alpha2delta 2
CACNA2D3	55799	calcium voltage-gated channel auxiliary subunit alpha2delta 3
CACNG4	27092	calcium voltage-gated channel auxiliary subunit gamma 4
CACTIN	58509	cactin, spliceosome C complex subunit
CACUL1	143384	CDK2 associated cullin domain 1
CACYBP	27101	calcyclin binding protein
CADM1	23705	cell adhesion molecule 1
CADM2	253559	cell adhesion molecule 2
CADM3	57863	cell adhesion molecule 3
CADM4	199731	cell adhesion molecule 4
CADPS	8618	calcium dependent secretion activator
CAPS	8618	calcium dependent secretion activator
CADPS2	93664	calcium dependent secretion activator 2
CALB1	793	calbindin 1
CALB2	794	calbindin 2
CALCA	796	calcitonin related polypeptide alpha
CALCOCO1	57658	calcium binding and coiled-coil domain 1
CALCOCO2	10241	calcium binding and coiled-coil domain 2
CALCRL	10203	calcitonin receptor like receptor
CALD1	800	caldesmon 1
CALHM2	51063	calcium homeostasis modulator family member 2
FAM26E	254228	calcium homeostasis modulator family member 5
FAM26F	441168	calcium homeostasis modulator family member 6
CALM3	808	calmodulin 3
CALML3	810	calmodulin like 3
CALML4	91860	calmodulin like 4
CALML5	51806	calmodulin like 5
CALR	811	calreticulin
CALU	813	calumenin
CAMK1	8536	calcium/calmodulin dependent protein kinase I
CAMK1D	57118	calcium/calmodulin dependent protein kinase ID
CAMK2B	816	calcium/calmodulin dependent protein kinase II beta
CAMK2D	817	calcium/calmodulin dependent protein kinase II delta
CAMK2G	818	calcium/calmodulin dependent protein kinase II gamma
CAMK4	814	calcium/calmodulin dependent protein kinase IV
CAMKK1	84254	calcium/calmodulin dependent protein kinase kinase 1
CAMKK2	10645	calcium/calmodulin dependent protein kinase kinase 2
CAMLG	819	calcium modulating ligand
CAMSAP1	157922	calmodulin regulated spectrin associated protein 1
CAMSAP2	23271	calmodulin regulated spectrin associated protein family member 2
CAMSAP3	57662	calmodulin regulated spectrin associated protein family member 3
CAND1	55832	cullin associated and neddylation dissociated 1
CAND2	23066	cullin associated and neddylation dissociated 2 (putative)
CANT1	124583	calcium activated nucleotidase 1
CANX	821	calnexin
CAPN1	823	calpain 1
CAPN13	92291	calpain 13
CAPN15	6650	calpain 15
CAPN2	824	calpain 2
CAPN5	726	calpain 5
HTRA3	726	calpain 5
CAPN6	827	calpain 6
CAPN7	23473	calpain 7
CAPN8	388743	calpain 8
CAPN9	10753	calpain 9
CAPNS1	826	calpain small subunit 1
CAPRIN1	4076	cell cycle associated protein 1
CAPSL	133690	calcyphosine like
CAPZA1	829	capping actin protein of muscle Z-line subunit alpha 1
CAPZA2	830	capping actin protein of muscle Z-line subunit alpha 2
CAPZB	832	capping actin protein of muscle Z-line subunit beta
CARD10	29775	caspase recruitment domain family member 10
CARD11	84433	caspase recruitment domain family member 11
CARD14	79092	caspase recruitment domain family member 14
CARD16	114769	caspase recruitment domain family member 16
C9ORF89	84270	caspase recruitment domain family member 19
CARD6	84674	caspase recruitment domain family member 6
CARD8	22900	caspase recruitment domain family member 8
CARD9	64170	caspase recruitment domain family member 9
CARHSP1	23589	calcium regulated heat stable protein 1
CARM1	10498	coactivator associated arginine methyltransferase 1
LRRC16A	55604	capping protein regulator and myosin 1 linker 1
RLTPR	146206	capping protein regulator and myosin 1 linker 2
CARS	833	cysteinyl-tRNA synthetase 1
CARS2	79587	cysteinyl-tRNA synthetase 2, mitochondrial
CASC3	22794	CASC3 exon junction complex subunit
CASD1	64921	CAS1 domain containing 1
CASK	8573	calcium/calmodulin dependent serine protein kinase
CASKIN2	57513	CASK interacting protein 2
CASP1	834	caspase 1
CASP10	843	caspase 10
CASP14	23581	caspase 14
CASP2	835	caspase 2
CASP3	836	caspase 3
CASP4	837	caspase 4
CASP6	839	caspase 6
CASP7	840	caspase 7
CASP8	841	caspase 8
CASP9	842	caspase 9
CASQ1	844	calsequestrin 1
CASR	846	calcium sensing receptor
CASS4	57091	Cas scaffold protein family member 4
GATSL3	652968	cytosolic arginine sensor for mTORC1 subunit 1
GATSL2	729438	cytosolic arginine sensor for mTORC1 subunit 2
CASZ1	54897	castor zinc finger 1
CAV1	857	caveolin 1
CAV2	858	caveolin 2
CAV3	859	caveolin 3
PTRF	284119	caveolae associated protein 1
SDPR	8436	caveolae associated protein 2
PRKCDBP	112464	caveolae associated protein 3
CBFB	865	core-binding factor subunit beta
CBL	867	Cbl proto-oncogene
CBLL1	79872	Cbl proto-oncogene like 1
CBR1	873	carbonyl reductase 1
CBR3	874	carbonyl reductase 3
CBR4	84869	carbonyl reductase 4
CBS	875	cystathionine beta-synthase
CBX1	10951	chromobox 1
CBX2	84733	chromobox 2
CBX3	11335	chromobox 3
CBX4	8535	chromobox 4
CBX5	23468	chromobox 5
CBX6	23466	chromobox 6
CBX7	23492	chromobox 7
CBX8	57332	chromobox 8
CBY1	25776	chibby family member 1, beta catenin antagonist
CC2D1A	54862	coiled-coil and C2 domain containing 1A
CC2D1B	200014	coiled-coil and C2 domain containing 1B
CCAR1	55749	cell division cycle and apoptosis regulator 1
CCAR2	57805	cell cycle and apoptosis regulator 2
CCBE1	147372	collagen and calcium binding EGF domains 1
CCDC102A	92922	coiled-coil domain containing 102A
CCDC115	84317	coiled-coil domain containing 115
CCDC117	150275	coiled-coil domain containing 117
CCDC12	151903	coiled-coil domain containing 12
CCDC124	115098	coiled-coil domain containing 124
CCDC126	90693	coiled-coil domain containing 126
CCDC127	133957	coiled-coil domain containing 127
CCDC134	79879	coiled-coil domain containing 134
CCDC137	339230	coiled-coil domain containing 137
CCDC141	285025	coiled-coil domain containing 141
CCDC149	91050	coiled-coil domain containing 149
CCDC160	347475	coiled-coil domain containing 160
CCDC167	154467	coiled-coil domain containing 167
CCDC170	80129	coiled-coil domain containing 170
CCDC174	51244	coiled-coil domain containing 174
CCDC186	55088	coiled-coil domain containing 186
CCDC22	28952	coiled-coil domain containing 22
CCDC25	55246	coiled-coil domain containing 25
CCDC28A	25901	coiled-coil domain containing 28A
C15ORF57	90416	coiled-coil domain containing 32
CCDC40	55036	coiled-coil domain containing 40
CCDC43	124808	coiled-coil domain containing 43
CCDC47	57003	coiled-coil domain containing 47
CCDC50	152137	coiled-coil domain containing 50
CCDC51	79714	coiled-coil domain containing 51
CCDC57	284001	coiled-coil domain containing 57
CCDC6	8030	coiled-coil domain containing 6
CCDC61	729440	coiled-coil domain containing 61
CCDC68	80323	coiled-coil domain containing 68
CCDC69	26112	coiled-coil domain containing 69
CCDC71	64925	coiled-coil domain containing 71
CCDC71L	168455	coiled-coil domain containing 71 like
CCDC77	84318	coiled-coil domain containing 77
CCDC8	83987	coiled-coil domain containing 8
CCDC80	151887	coiled-coil domain containing 80
CCDC82	79780	coiled-coil domain containing 82
CCDC85A	114800	coiled-coil domain containing 85A
CCDC85B	11007	coiled-coil domain containing 85B
CCDC85C	317762	coiled-coil domain containing 85C
CCDC86	79080	coiled-coil domain containing 86
CCDC88A	55704	coiled-coil domain containing 88A
CCDC88B	283234	coiled-coil domain containing 88B
CCDC88C	440193	coiled-coil domain containing 88C
CCDC9	26093	coiled-coil domain containing 9
CCDC90B	60492	coiled-coil domain containing 90B
CCDC91	55297	coiled-coil domain containing 91
CCDC92	80212	coiled-coil domain containing 92
CCDC93	54520	coiled-coil domain containing 93
CCDC97	90324	coiled-coil domain containing 97
C15ORF52	388115	coiled-coil domain containing 9B
SCYL1	6357	C-C motif chemokine ligand 13
CCL14	6358	C-C motif chemokine ligand 14
SCYL2	6358	C-C motif chemokine ligand 14
SCYL3	6359	C-C motif chemokine ligand 15
CCL18	6362	C-C motif chemokine ligand 18
CCL19	6363	C-C motif chemokine ligand 19
CCL2	6347	C-C motif chemokine ligand 2
CCL20	6364	C-C motif chemokine ligand 20
CCL21	6366	C-C motif chemokine ligand 21
CCL26	10344	C-C motif chemokine ligand 26
CCL5	6352	C-C motif chemokine ligand 5
CCM2	83605	CCM2 scaffold protein
CCM2L	140706	CCM2 like scaffold protein
CYR61	3491	cellular communication network factor 1
CTGF	1490	cellular communication network factor 2
NOV	4856	cellular communication network factor 3
WISP1	8840	cellular communication network factor 4
WISP2	8839	cellular communication network factor 5
WISP3	8838	cellular communication network factor 6
CCNA2	890	cyclin A2
CCNB1	891	cyclin B1
CCNB2	9133	cyclin B2
CCNC	892	cyclin C
CCND1	595	cyclin D1
CCNDBP1	23582	cyclin D1 binding protein 1
CCNH	902	cyclin H
CYC1	10983	cyclin I
CCNK	8812	cyclin K
CCNL2	81669	cyclin L2
CCNT1	904	cyclin T1
CCNT2	905	cyclin T2
CCNY	219771	cyclin Y
CCNYL1	151195	cyclin Y like 1
CCP110	9738	centriolar coiled-coil protein 110
CCPG1	9236	cell cycle progression 1
CCR1	1230	C-C motif chemokine receptor 1
CCR2	729230	C-C motif chemokine receptor 2
CCR5	1234	C-C motif chemokine receptor 5
CCR6	1235	C-C motif chemokine receptor 6
CCR7	1236	C-C motif chemokine receptor 7
CCRL2	9034	C-C motif chemokine receptor like 2
CCS	9973	copper chaperone for superoxide dismutase
CCSAP	126731	centriole, cilia and spindle associated protein
CCSER2	54462	coiled-coil serine rich protein 2
CCT2	10576	chaperonin containing TCP1 subunit 2
CCT3	7203	chaperonin containing TCP1 subunit 3
CCT4	10575	chaperonin containing TCP1 subunit 4
CCT5	22948	chaperonin containing TCP1 subunit 5
CCT6A	908	chaperonin containing TCP1 subunit 6A
CCT7	10574	chaperonin containing TCP1 subunit 7
CCT8	10694	chaperonin containing TCP1 subunit 8
CCZ1	221960	CCZ1 homolog B, vacuolar protein trafficking and biogenesis associated
CD101	9398	CD101 molecule
CD109	135228	CD109 molecule
CD151	977	CD151 molecule (Raph blood group)
CD163	9332	CD163 molecule
CD163L1	283316	CD163 molecule like 1
CD177	57126	CD177 molecule
CD180	4064	CD180 molecule
CD19	930	CD19 molecule
CD1A	909	CD1a molecule
CD1C	911	CD1c molecule
CD2	914	CD2 molecule
CD200	4345	CD200 molecule
CD200R1	131450	CD200 receptor 1
CD207	50489	CD207 molecule
CD209	30835	CD209 molecule
CD22	933	CD22 molecule
CD226	10666	CD226 molecule
CD247	919	CD247 molecule
CD248	57124	CD248 molecule
CD27	939	CD27 molecule
CD274	29126	CD274 molecule
CD276	80381	CD276 molecule
CD2AP	23607	CD2 associated protein
CD2BP2	10421	CD2 cytoplasmic tail binding protein 2
CD300A	11314	CD300a molecule
CD300LF	146722	CD300 molecule like family member f
CD300LG	146894	CD300 molecule like family member g
CD302	9936	CD302 molecule
CD320	51293	CD320 molecule
CD33	945	CD33 molecule
CD34	947	CD34 molecule
CD36	948	CD36 molecule
CD37	951	CD37 molecule
CD38	952	CD38 molecule
CD3D	915	CD3 delta subunit of T-cell receptor complex
CD3E	916	CD3 epsilon subunit of T-cell receptor complex
CD3G	917	CD3 gamma subunit of T-cell receptor complex
CD4	920	CD4 molecule
CD40	958	CD40 molecule
CD44	960	CD44 molecule (Indian blood group)
CD46	4179	CD46 molecule
CD47	961	CD47 molecule
CD48	962	CD48 molecule
CD5	921	CD5 molecule
CD55	1604	CD55 molecule (Cromer blood group)
CD58	965	CD58 molecule
CD59	966	CD59 molecule (CD59 blood group)
CD5L	922	CD5 molecule like
CD6	923	CD6 molecule
CD63	967	CD63 molecule
CD68	968	CD68 molecule
CD69	969	CD69 molecule
CD7	924	CD7 molecule
CD70	970	CD70 molecule
CD72	971	CD72 molecule
CD74	972	CD74 molecule
CD79A	973	CD79a molecule
CD79B	974	CD79b molecule
CD81	975	CD81 molecule
CD82	3732	CD82 molecule
CD84	8832	CD84 molecule
CD8A	925	CD8a molecule
CD9	928	CD9 molecule
CD93	22918	CD93 molecule
CD99	4267	CD99 molecule (Xg blood group)
CD99L2	83692	CD99 molecule like 2
CDA	978	cytidine deaminase
CDAN1	146059	codanin 1
CDC123	8872	cell division cycle 123
CDC16	8881	cell division cycle 16
CDC20	991	cell division cycle 20
CDC23	8697	cell division cycle 23
CDC26	246184	cell division cycle 26
CDC27	996	cell division cycle 27
CDC34	997	cell division cycle 34, ubiqiutin conjugating enzyme
CDC37	11140	cell division cycle 37, HSP90 cochaperone
CDC37L1	55664	cell division cycle 37 like 1, HSP90 cochaperone
CDC40	51362	cell division cycle 40
CDC42	998	cell division cycle 42
CDC42BPA	8476	CDC42 binding protein kinase alpha
CDC42BPB	9578	CDC42 binding protein kinase beta
CDC42BPG	55561	CDC42 binding protein kinase gamma
CDC42EP1	11135	CDC42 effector protein 1
CDC42EP2	10435	CDC42 effector protein 2
CDC42EP3	10602	CDC42 effector protein 3
CDC42EP4	23580	CDC42 effector protein 4
CDC42EP5	148170	CDC42 effector protein 5
CDC42SE1	56882	CDC42 small effector 1
CDC42SE2	56990	CDC42 small effector 2
CDC45	8318	cell division cycle 45
CDC5L	988	cell division cycle 5 like
CDC7	8317	cell division cycle 7
CDC73	79577	cell division cycle 73
CDCA3	83461	cell division cycle associated 3
CDCA5	113130	cell division cycle associated 5
CDCA7L	55536	cell division cycle associated 7 like
CDCA8	55143	cell division cycle associated 8
CDCP1	64866	CUB domain containing protein 1
CDH11	1009	cadherin 11
CDH13	1012	cadherin 13
CDH3	1013	cadherin 15
CDH17	1015	cadherin 17
CDH2	1000	cadherin 2
CDH5	1003	cadherin 5
CDH6	1004	cadherin 6
CDHR2	54825	cadherin related family member 2
CDHR3	222256	cadherin related family member 3
CDIPT	10423	CDP-diacylglycerol--inositol 3-phosphatidyltransferase
CDK1	983	cyclin dependent kinase 1
CDK11A	728642	cyclin dependent kinase 11A
CDK12	51755	cyclin dependent kinase 12
CDK13	8621	cyclin dependent kinase 13
CDK14	5218	cyclin dependent kinase 14
CDK16	5127	cyclin dependent kinase 16
CDK17	5128	cyclin dependent kinase 17
CDK18	5129	cyclin dependent kinase 18
CDK19	23097	cyclin dependent kinase 19
CDK2	1017	cyclin dependent kinase 2
CDK2AP1	8099	cyclin dependent kinase 2 associated protein 1
CDK4	1019	cyclin dependent kinase 4
CDK5	1020	cyclin dependent kinase 5
CDK5RAP1	51654	CDK5 regulatory subunit associated protein 1
CDK5RAP2	55755	CDK5 regulatory subunit associated protein 2
CDK5RAP3	80279	CDK5 regulatory subunit associated protein 3
CDK6	1021	cyclin dependent kinase 6
CDK7	1022	cyclin dependent kinase 7
CDK9	1025	cyclin dependent kinase 9
CDKAL1	54901	CDK5 regulatory subunit associated protein 1 like 1
CDKN1B	1027	cyclin dependent kinase inhibitor 1B
CDKN2A	1029	cyclin dependent kinase inhibitor 2A
CDKN2AIP	55602	CDKN2A interacting protein
CDKN2AIPNL	91368	CDKN2A interacting protein N-terminal like
CDKN2C	1031	cyclin dependent kinase inhibitor 2C
CDKN2D	1032	cyclin dependent kinase inhibitor 2D
CDR2	1039	cerebellar degeneration related protein 2
CDR2L	30850	cerebellar degeneration related protein 2 like
CDS2	8760	CDP-diacylglycerol synthase 2
CDSN	1041	corneodesmosin
CDV3	55573	CDV3 homolog
CDYL	9425	chromodomain Y like
CEACAM1	634	CEA cell adhesion molecule 1
CEACAM4	1089	CEA cell adhesion molecule 4
CEACAM5	1048	CEA cell adhesion molecule 5
CEACAM6	4680	CEA cell adhesion molecule 6
CEACAM7	1087	CEA cell adhesion molecule 7
CEACAM8	1088	CEA cell adhesion molecule 8
CEBPB	1051	CCAAT enhancer binding protein beta
CEBPD	1052	CCAAT enhancer binding protein delta
CEBPG	1054	CCAAT enhancer binding protein gamma
CEL	1056	carboxyl ester lipase
FAP	1056	carboxyl ester lipase
CELF1	10658	CUGBP Elav-like family member 1
CELF2	10659	CUGBP Elav-like family member 2
CELSR1	9620	cadherin EGF LAG seven-pass G-type receptor 1
CELSR2	1952	cadherin EGF LAG seven-pass G-type receptor 2
CEMIP	57214	cell migration inducing hyaluronidase 1
TMEM2	23670	cell migration inducing hyaluronidase 2
CENPB	1059	centromere protein B
CENPC	1060	centromere protein C
CENPF	1063	centromere protein F
CENPH	64946	centromere protein H
CENPK	64105	centromere protein K
CENPL	91687	centromere protein L
CENPM	79019	centromere protein M
CENPN	55839	centromere protein N
CENPO	79172	centromere protein O
CENPQ	55166	centromere protein Q
APITD1	100526739	CENPS-CORT readthrough
CENPT	80152	centromere protein T
CENPV	201161	centromere protein V
CEP112	201134	centrosomal protein 112
CEP120	153241	centrosomal protein 120
CEP128	145508	centrosomal protein 128
CEP131	22994	centrosomal protein 131
CEP135	9662	centrosomal protein 135
CEP152	22995	centrosomal protein 152
CEP164	22897	centrosomal protein 164
CEP170	9859	centrosomal protein 170
CEP170B	283638	centrosomal protein 170B
CEP192	55125	centrosomal protein 192
FOPNL	123811	centrosomal protein 20
CEP250	11190	centrosomal protein 250
CEP290	80184	centrosomal protein 290
CEP350	9857	centrosomal protein 350
CEP41	95681	centrosomal protein 41
FGFR1OP	11116	centrosomal protein 43
CEP44	80817	centrosomal protein 44
CEP55	55165	centrosomal protein 55
CEP57	9702	centrosomal protein 57
CEP63	80254	centrosomal protein 63
CEP76	79959	centrosomal protein 76
CEP78	84131	centrosomal protein 78
CEP83	51134	centrosomal protein 83
CEP85	64793	centrosomal protein 85
CEP89	84902	centrosomal protein 89
CEP95	90799	centrosomal protein 95
CEP97	79598	centrosomal protein 97
CEPT1	10390	choline/ethanolamine phosphotransferase 1
CERCAM	51148	cerebral endothelial cell adhesion molecule
CERS2	29956	ceramide synthase 2
CERS4	79603	ceramide synthase 4
CERS5	253782	ceramide synthase 6
CERS6	253782	ceramide synthase 6
COL4A3BP	10087	ceramide transporter 1
CES1	1066	carboxylesterase 1
CES2	1066	carboxylesterase 1
CES3	23491	carboxylesterase 3
CETN2	1069	centrin 2
CETN3	1070	centrin 3
CETP	1071	cholesteryl ester transfer protein
C15ORF26	161502	cilia and flagella associated protein 161
CFAP20	29105	cilia and flagella associated protein 20
C1ORF194	127003	cilia and flagella associated protein 276
C21ORF59	56683	cilia and flagella associated protein 298
CFAP36	112942	cilia and flagella associated protein 36
C21ORF2	755	cilia and flagella associated protein 410
C8ORF37	157657	cilia and flagella associated protein 418
CFAP45	25790	cilia and flagella associated protein 45
CFAP52	146845	cilia and flagella associated protein 52
CFAP53	220136	cilia and flagella associated protein 53
CFAP57	149465	cilia and flagella associated protein 57
CFAP58	159686	cilia and flagella associated protein 58
MIA2	387885	cilia and flagella associated protein 73
C9ORF171	389799	cilia and flagella associated protein 77
CFAP97	57587	cilia and flagella associated protein 97
CFB	629	complement factor B
CFDP1	10428	craniofacial development protein 1
CFH	3075	complement factor H
FH	3075	complement factor H
FHL1	3075	complement factor H
CFHR1	3078	complement factor H related 1
CFHR2	3080	complement factor H related 2
CFHR3	10878	complement factor H related 3
CFHR5	81494	complement factor H related 5
CFI	3426	complement factor I
CFL2	1073	cofilin 2
CFLAR	8837	CASP8 and FADD like apoptosis regulator
CFP	5199	complement factor properdin
CFTR	1080	CF transmembrane conductance regulator
MB21D1	115004	cyclic GMP-AMP synthase
CGGBP1	8545	CGG triplet repeat binding protein 1
CGN	57530	cingulin
CGNL1	84952	cingulin like 1
CGREF1	10669	cell growth regulator with EF-hand domain 1
CHAC2	494143	ChaC glutathione specific gamma-glutamylcyclotransferase 2
CHAD	1101	chondroadherin
CHAF1A	10036	chromatin assembly factor 1 subunit A
CHAF1B	8208	chromatin assembly factor 1 subunit B
MPP7	8208	chromatin assembly factor 1 subunit B
CAMP	283489	chromosome alignment maintaining phosphoprotein 1
CHAMP1	283489	chromosome alignment maintaining phosphoprotein 1
CHCHD1	118487	coiled-coil-helix-coiled-coil-helix domain containing 1
CHCHD10	400916	coiled-coil-helix-coiled-coil-helix domain containing 10
CHCHD2	51142	coiled-coil-helix-coiled-coil-helix domain containing 2
CHCHD3	54927	coiled-coil-helix-coiled-coil-helix domain containing 3
CHCHD4	131474	coiled-coil-helix-coiled-coil-helix domain containing 4
CHCHD5	84269	coiled-coil-helix-coiled-coil-helix domain containing 5
CHCHD6	84303	coiled-coil-helix-coiled-coil-helix domain containing 6
CHCHD7	79145	coiled-coil-helix-coiled-coil-helix domain containing 7
CHD1	1105	chromodomain helicase DNA binding protein 1
CHD1L	9557	chromodomain helicase DNA binding protein 1 like
CHD3	1107	chromodomain helicase DNA binding protein 3
CHD4	1108	chromodomain helicase DNA binding protein 4
CHD6	84181	chromodomain helicase DNA binding protein 6
CHD7	55636	chromodomain helicase DNA binding protein 7
CHD8	57680	chromodomain helicase DNA binding protein 8
CHD9	80205	chromodomain helicase DNA binding protein 9
CHDH	55349	choline dehydrogenase
CHEK1	1111	checkpoint kinase 1
CDS1	11200	checkpoint kinase 2
CHEK2	11200	checkpoint kinase 2
CHERP	10523	calcium homeostasis endoplasmic reticulum protein
CHGA	1113	chromogranin A
CHGB	1114	chromogranin B
CHI3L1	1116	chitinase 3 like 1
CHI3L2	1117	chitinase 3 like 2
CHID1	66005	chitinase domain containing 1
CHIT1	1118	chitinase 1
CHKA	1119	choline kinase alpha
CHKB	1120	choline kinase beta
CKB	1120	choline kinase beta
CPT1B	386593	CHKB-CPT1B readthrough (NMD candidate)
CHML	1122	CHM like Rab escort protein
CHMP1A	5119	charged multivesicular body protein 1A
CHMP1B	57132	charged multivesicular body protein 1B
CHMP2A	27243	charged multivesicular body protein 2A
CHMP2B	25978	charged multivesicular body protein 2B
CHMP4B	29082	charged multivesicular body protein 4A
CHMP4A	128866	charged multivesicular body protein 4B
CHMP4C	92421	charged multivesicular body protein 4C
CHMP5	51510	charged multivesicular body protein 5
CHMP6	79643	charged multivesicular body protein 6
CHMP7	91782	charged multivesicular body protein 7
CHORDC1	26973	cysteine and histidine rich domain containing 1
CHP1	26973	cysteine and histidine rich domain containing 1
CHPF	79586	chondroitin polymerizing factor
CHPF2	54480	chondroitin polymerizing factor 2
CHPT1	56994	choline phosphotransferase 1
CHRAC1	54108	chromatin accessibility complex subunit 1
CHRD	8646	chordin
CHRDL1	91851	chordin like 1
CHRDL2	25884	chordin like 2
CHST10	9486	carbohydrate sulfotransferase 10
CHST11	50515	carbohydrate sulfotransferase 11
CHST12	55501	carbohydrate sulfotransferase 12
CHST13	166012	carbohydrate sulfotransferase 13
CHST14	113189	carbohydrate sulfotransferase 14
CHST15	51363	carbohydrate sulfotransferase 15
CHST2	9435	carbohydrate sulfotransferase 2
CHST3	9469	carbohydrate sulfotransferase 3
CHST4	10164	carbohydrate sulfotransferase 4
CHST6	4166	carbohydrate sulfotransferase 6
CHST7	56548	carbohydrate sulfotransferase 7
CHST9	83539	carbohydrate sulfotransferase 9
CHSY1	22856	chondroitin sulfate synthase 1
CHSY3	337876	chondroitin sulfate synthase 3
CHTF18	63922	chromosome transmission fidelity factor 18
CHTF8	54921	chromosome transmission fidelity factor 8
CHTOP	26097	chromatin target of PRMT1
CHUK	1147	component of inhibitor of nuclear factor kappa B kinase complex
CHURC1	91612	churchill domain containing 1
FNTB	100529261	CHURC1-FNTB readthrough
CIAO1	9391	cytosolic iron-sulfur assembly component 1
FAM96A	84191	cytosolic iron-sulfur assembly component 2A
FAM96B	51647	cytosolic iron-sulfur assembly component 2B
NARFL	64428	cytosolic iron-sulfur assembly component 3
CIAPIN1	57019	cytokine induced apoptosis inhibitor 1
CIB1	10519	calcium and integrin binding 1
FAM92A1	137392	CBY1 interacting BAR domain containing 1
FAM92B	339145	CBY1 interacting BAR domain containing 2
CIC	23152	capicua transcriptional repressor
CILP	8483	cartilage intermediate layer protein
CILP2	148113	cartilage intermediate layer protein 2
CINP	51550	cyclin dependent kinase 2 interacting protein
KIAA1524	57650	cellular inhibitor of PP2A
CIRBP	1153	cold inducible RNA binding protein
CISD1	55847	CDGSH iron sulfur domain 1
CISD2	493856	CDGSH iron sulfur domain 2
CISD3	284106	CDGSH iron sulfur domain 3
CIZ1	25792	CDKN1A interacting zinc finger protein 1
CKAP2	26586	cytoskeleton associated protein 2
CKAP4	10970	cytoskeleton associated protein 4
CKAP5	9793	cytoskeleton associated protein 5
CKLF	51192	chemokine like factor
CKM	1158	creatine kinase, M-type
CKMT1A	548596	creatine kinase, mitochondrial 1A
CKMT2	1160	creatine kinase, mitochondrial 2
CKS1B	1163	CDC28 protein kinase regulatory subunit 1B
CKS2	1164	CDC28 protein kinase regulatory subunit 2
CLASP1	23332	cytoplasmic linker associated protein 1
CLASP2	23122	cytoplasmic linker associated protein 2
CLASRP	11129	CLK4 associating serine/arginine rich protein
CLC	1178	Charcot-Leyden crystal galectin
CLCA1	1179	chloride channel accessory 1
CLCA2	9635	chloride channel accessory 2
CLCA4	22802	chloride channel accessory 4
CLCC1	23155	chloride channel CLIC like 1
CLCN1	1180	chloride voltage-gated channel 1
CLCN3	1182	chloride voltage-gated channel 3
CLCN4	1183	chloride voltage-gated channel 4
CLCN5	1184	chloride voltage-gated channel 5
CLCN6	1185	chloride voltage-gated channel 6
CLCN7	1186	chloride voltage-gated channel 7
CLDN1	9076	claudin 1
CLDN10	9071	claudin 10
CLDN12	9069	claudin 12
CLDN18	51208	claudin 18
CLDN2	9075	claudin 2
CLDN23	137075	claudin 23
CLDN3	1365	claudin 3
CLDN4	1364	claudin 4
CLDN5	7122	claudin 5
CLDN6	9074	claudin 6
CLDN7	1366	claudin 7
CLDND1	56650	claudin domain containing 1
CLEC10A	10462	C-type lectin domain containing 10A
CLEC11A	6320	C-type lectin domain containing 11A
CLEC12A	160364	C-type lectin domain family 12 member A
CLEC14A	161198	C-type lectin domain containing 14A
CLEC16A	23274	C-type lectin domain containing 16A
CLEC18B	497190	C-type lectin domain family 18 member B
CLEC1A	51267	C-type lectin domain family 1 member A
CLEC2B	51266	C-type lectin domain family 1 member B
CLEC3B	7123	C-type lectin domain family 3 member B
CLEC4A	50856	C-type lectin domain family 4 member A
CLEC4E	26253	C-type lectin domain family 4 member E
CLEC4M	10332	C-type lectin domain family 4 member M
CLEC5A	23601	C-type lectin domain containing 5A
CLEC7A	64581	C-type lectin domain containing 7A
CLIC1	1192	chloride intracellular channel 1
CLIC2	1193	chloride intracellular channel 2
CLIC3	9022	chloride intracellular channel 3
CLIC4	25932	chloride intracellular channel 4
CLIC5	53405	chloride intracellular channel 5
CLIC6	54102	chloride intracellular channel 6
CLINT1	9685	clathrin interactor 1
CLIP1	6249	CAP-Gly domain containing linker protein 1
CLIP2	7461	CAP-Gly domain containing linker protein 2
CLK3	1198	CDC like kinase 3
CLK4	57396	CDC like kinase 4
CLMN	79789	calmin
CLMP	79827	CXADR like membrane protein
CLN3	1201	CLN3 lysosomal/endosomal transmembrane protein, battenin
CLN5	1203	CLN5 intracellular trafficking protein
CLN6	54982	CLN6 transmembrane ER protein
CLN8	2055	CLN8 transmembrane ER and ERGIC protein
CLNS1A	1207	chloride nucleotide-sensitive channel 1A
CLOCK	9575	clock circadian regulator
CLPB	81570	caseinolytic mitochondrial matrix peptidase chaperone subunit B
CLPP	8192	caseinolytic mitochondrial matrix peptidase proteolytic subunit
CLPTM1	1209	CLPTM1 regulator of GABA type A receptor forward trafficking
CLPTM1L	81037	CLPTM1 like
CLPX	10845	caseinolytic mitochondrial matrix peptidase chaperone subunit X
CLSTN1	22883	calsyntenin 1
PIK3CD	22883	calsyntenin 1
CLSTN3	9746	calsyntenin 3
CLTA	1211	clathrin light chain A
CLTB	1212	clathrin light chain B
CLTC	1213	clathrin heavy chain
CLTCL1	8218	clathrin heavy chain like 1
CLU	1191	clusterin
TRPM2	1191	clusterin
CLUAP1	23059	clusterin associated protein 1
CLUH	23277	clustered mitochondria homolog
CLYBL	171425	citramalyl-CoA lyase
CMA1	1215	chymase 1
CMAS	55907	cytidine monophosphate N-acetylneuraminic acid synthetase
CMBL	134147	carboxymethylenebutenolidase homolog
CMC2	56942	C-X9-C motif containing 2
CMC4	100272147	C-X9-C motif containing 4
CMIP	80790	c-Maf inducing protein
CMKLR1	1240	chemerin chemokine-like receptor 1
CMPK1	51727	cytidine/uridine monophosphate kinase 1
CMPK2	129607	cytidine/uridine monophosphate kinase 2
CMSS1	84319	cms1 ribosomal small subunit homolog
CMTM5	116173	CKLF like MARVEL transmembrane domain containing 5
CMTM6	54918	CKLF like MARVEL transmembrane domain containing 6
CMTM7	112616	CKLF like MARVEL transmembrane domain containing 7
CMTM8	152189	CKLF like MARVEL transmembrane domain containing 8
CMTR1	23070	cap methyltransferase 1
CMTR2	55783	cap methyltransferase 2
CNBP	7555	CCHC-type zinc finger nucleic acid binding protein
CNDP1	84735	carnosine dipeptidase 1
CNDP2	55748	carnosine dipeptidase 2
CNEP1R1	255919	CTD nuclear envelope phosphatase 1 regulatory subunit 1
CNFN	84518	cornifelin
GAR1	1258	cyclic nucleotide gated channel subunit beta 1
CNIH1	10175	cornichon family AMPA receptor auxiliary protein 1
CNIH3	149111	cornichon family AMPA receptor auxiliary protein 3
CNIH4	29097	cornichon family AMPA receptor auxiliary protein 4
CNKSR1	10256	connector enhancer of kinase suppressor of Ras 1
CNKSR3	154043	CNKSR family member 3
MAGI1	154043	CNKSR family member 3
LECT1	11061	chondromodulin
CNN1	1264	calponin 1
CNN2	1265	calponin 2
CNN3	1266	calponin 3
CNNM2	54805	cyclin and CBS domain divalent metal cation transport mediator 2
CNNM3	26505	cyclin and CBS domain divalent metal cation transport mediator 3
CNNM4	26504	cyclin and CBS domain divalent metal cation transport mediator 4
CNOT1	23019	CCR4-NOT transcription complex subunit 1
CNOT10	25904	CCR4-NOT transcription complex subunit 10
CNOT11	55571	CCR4-NOT transcription complex subunit 11
CNOT2	4848	CCR4-NOT transcription complex subunit 2
CNOT3	4849	CCR4-NOT transcription complex subunit 3
CNOT4	4850	CCR4-NOT transcription complex subunit 4
CNOT6L	246175	CCR4-NOT transcription complex subunit 6 like
CNOT7	29883	CCR4-NOT transcription complex subunit 7
CNOT8	9337	CCR4-NOT transcription complex subunit 8
RQCD1	9125	CCR4-NOT transcription complex subunit 9
CNPY2	10330	canopy FGF signaling regulator 2
CNPY3	10695	canopy FGF signaling regulator 3
CNPY4	245812	canopy FGF signaling regulator 4
CNRIP1	25927	cannabinoid receptor interacting protein 1
CRIP1	25927	cannabinoid receptor interacting protein 1
CNST	163882	consortin, connexin sorting protein
CNTFR	1271	ciliary neurotrophic factor receptor
CNTN1	1272	contactin 1
F3	1272	contactin 1
CNTN4	152330	contactin 4
CNTNAP1	8506	contactin associated protein 1
CNTNAP2	26047	contactin associated protein 2
CNTRL	11064	centriolin
CNTROB	116840	centrobin, centriole duplication and spindle assembly protein
COA1	55744	cytochrome c oxidase assembly factor 1
COA3	28958	cytochrome c oxidase assembly factor 3
COA4	51287	cytochrome c oxidase assembly factor 4 homolog
COA5	493753	cytochrome c oxidase assembly factor 5
COA6	388753	cytochrome c oxidase assembly factor 6
COA7	65260	cytochrome c oxidase assembly factor 7
COASY	80347	Coenzyme A synthase
PPAT	80347	Coenzyme A synthase
COBL	23242	cordon-bleu WH2 repeat protein
COBLL1	22837	cordon-bleu WH2 repeat protein like 1
COCH	1690	cochlin
COG1	9382	component of oligomeric golgi complex 1
COG2	22796	component of oligomeric golgi complex 2
COG3	83548	component of oligomeric golgi complex 3
COG4	25839	component of oligomeric golgi complex 4
COG5	10466	component of oligomeric golgi complex 5
COG6	57511	component of oligomeric golgi complex 6
COG7	91949	component of oligomeric golgi complex 7
COG8	84342	component of oligomeric golgi complex 8
COIL	8161	coilin
COL10A1	1300	collagen type X alpha 1 chain
COL11A1	1301	collagen type XI alpha 1 chain
COL12A1	1303	collagen type XII alpha 1 chain
COL14A1	7373	collagen type XIV alpha 1 chain
COL15A1	1306	collagen type XV alpha 1 chain
COL16A1	1307	collagen type XVI alpha 1 chain
COL17A1	1308	collagen type XVII alpha 1 chain
COL18A1	80781	collagen type XVIII alpha 1 chain
COL1A1	1277	collagen type I alpha 1 chain
COL1A2	1278	collagen type I alpha 2 chain
COL21A1	81578	collagen type XXI alpha 1 chain
COL22A1	169044	collagen type XXII alpha 1 chain
COL26A1	136227	collagen type XXVI alpha 1 chain
COL28A1	340267	collagen type XXVIII alpha 1 chain
COL2A1	1280	collagen type II alpha 1 chain
COL3A1	1281	collagen type III alpha 1 chain
COL4A1	1282	collagen type IV alpha 1 chain
COL4A2	1284	collagen type IV alpha 2 chain
COL4A3	1285	collagen type IV alpha 3 chain
COL4A4	1286	collagen type IV alpha 4 chain
COL4A5	1287	collagen type IV alpha 5 chain
COL4A6	1288	collagen type IV alpha 6 chain
COL5A1	1289	collagen type V alpha 1 chain
COL5A2	1290	collagen type V alpha 2 chain
COL5A3	50509	collagen type V alpha 3 chain
COL6A1	1291	collagen type VI alpha 1 chain
COL6A2	1292	collagen type VI alpha 2 chain
COL6A3	1293	collagen type VI alpha 3 chain
COL6A5	256076	collagen type VI alpha 5 chain
COL6A6	131873	collagen type VI alpha 6 chain
COL7A1	1294	collagen type VII alpha 1 chain
COL8A1	1295	collagen type VIII alpha 1 chain
COL8A2	1296	collagen type VIII alpha 2 chain
COL9A1	1297	collagen type IX alpha 1 chain
COL9A2	1298	collagen type IX alpha 2 chain
COL9A3	1299	collagen type IX alpha 3 chain
COLEC11	78989	collectin subfamily member 11
COLEC12	81035	collectin subfamily member 12
COLGALT1	79709	collagen beta(1-O)galactosyltransferase 1
COMMD1	150684	copper metabolism domain containing 1
COMMD10	51397	COMM domain containing 10
COMMD2	51122	COMM domain containing 2
COMMD3	23412	COMM domain containing 3
COMMD4	54939	COMM domain containing 4
COMMD5	28991	COMM domain containing 5
COMMD6	170622	COMM domain containing 6
COMMD7	149951	COMM domain containing 7
COMMD8	54951	COMM domain containing 8
COMMD9	29099	COMM domain containing 9
COMP	1311	cartilage oligomeric matrix protein
COMT	1312	catechol-O-methyltransferase
COMTD1	118881	catechol-O-methyltransferase domain containing 1
RFWD2	64326	COP1 E3 ubiquitin ligase
COPA	1314	COPI coat complex subunit alpha
COPB1	1315	COPI coat complex subunit beta 1
COPB2	9276	COPI coat complex subunit beta 2
COPE	11316	COPI coat complex subunit epsilon
COPG1	22820	COPI coat complex subunit gamma 1
COPG2	26958	COPI coat complex subunit gamma 2
[truncated: 9,044 more rows]
