# Supplementary material for: Quantitative analysis of fucosylated glycoproteins by immobilized lectin-affinity fluorescent labeling
Source: Royal Society of Chemistry journal article supplement (doi:10.1039/d3ra00072a), 2023-01-01
Supplement: d3ra00072a3.xlsx [file d3ra00072a3.xlsx]

## Sheet: Sheet1
Table S2. List of lectins and their affinity specificity for fucose linkages.
Lectin	Abbreviation	Specificity
Angilla angilla agglutinin	AAA	Fucose α(1,2/4)
Aleuria aurantia Lectin	AAL	Fucose α(1,2/3/4/6)
Aspergillus fumigatus lectin	AFL	Fucose α(1,2/3/4)
Aspergillus niger lectin	ANL	Fucose α(1,6)
Arthrobotrys oligospora lectin	AofleA	Fucose α(1,2/3/4/6)
Aspergillus oryzae lectin	AOL	Fucose α(1,2/3/4/6)
Bryothamnion triquetrum lectin	BTL	Fucose α(1,6)
Coprinopsis cinerea lectin 2	CCL2	Fucose α(1,3)
Coprinopsis cinerea galectin 2	CGL2	Fucose α(1,2)
Hypnea japonica lectin	HJL	Fucose α(1,6)
Lens culinaris Agglutinin	LCA	Fucose α(1,6)
Lotus tetragonolobus Lectin	LTL	Fucoseα-1,3GlcNAc(core fucose)
Pholiota squarrosa lectin	PhoSL	Fucose α(1,6)
Pisum sativum Agglutinin	PSA	Fucose α(1,6)
Rhizopus stolonifer lectin	RSL	Fucose α(1,6)
Ulex europaeus Agglutinin I	UEA-I	Fucose α(1,2)
